# Supplementary material for: Palladium-catalyzed asymmetric hydrophosphorylation of alkynes: facile access to P-stereogenic phosphinates
Source: Royal Society of Chemistry journal article supplement (doi:10.1039/d0sc01049a), 2020-01-01

# **Palladium-Catalyzed Asymmetric Hydrophosphorylation of Alkynes:**

## **Facile Access to P-Stereogenic Phosphinates**

Zhiping Yang,<sup>ab</sup> Xiaodong Gu,<sup>b</sup> Li-biao Han<sup>c</sup> and Jun (Joelle) Wang<sup>\*b</sup>

<sup>a</sup>Harbin Institute of Technology, Harbin 150080, China

<sup>b</sup>Shenzhen Grubbs Institute and Department of Chemistry, Southern University of Science and Technology, Shenzhen 518055, China.

<sup>c</sup>National Institute of Advanced Industrial Science and Technology (AIST), Tsukuba, Ibaraki 305-8565, Japan

E-mail: wang.j@sustech.edu.cn

### **Table of Contents**

|                                                             |      |
|-------------------------------------------------------------|------|
| 1. General information.....                                 | S1   |
| 2. Screening of the reaction conditions.....                | S3   |
| 3. Typical procedure for hydrophosphination of alkynes..... | S3   |
| 4. Gram-scale alkenylphosphinates synthesis.....            | S3   |
| 5. Synthetic transformation of the products .....           | S4   |
| 6. Deuterium labelling experiment.....                      | S5   |
| 7. Analytic data for the products.....                      | S9   |
| 8. NMR spectrum.....                                        | S25  |
| 9. HPLC spectrum.....                                       | S70  |
| 10. X-ray crystal structure of <b>4</b> .....               | S100 |

---

## 1. General information

NMR Spectra were recorded on a Bruker DPX-500 (400) spectrometer at 500 MHz or 400 MHz for  $^1\text{H}$  NMR, 200MHz or 160MHz for  $^{31}\text{P}$  NMR, 376 MHz for  $^{19}\text{F}$  NMR and 100 MHz or 125 MHz for  $^{13}\text{C}$  NMR in  $\text{CDCl}_3$  with tetramethylsilane (TMS) or the residual deuterated solvent peaks as internal standard. Chemical shifts ( $\delta$ ) are reported in ppm, and coupling constants ( $J$ ) are in Hertz (Hz). Flash column chromatograph was carried out using 200-300 mesh silica gel at medium pressure. High resolution mass spectra (HRMS) were recorded on a LC-TOF spectrometer. ESI-HRMS data were acquired using a Thermo LTQ Orbitrap XL Instrument equipped with an ESI source. Optical rotation was obtained on a Rudolph Research Analytical (Atopol I). HPLC analysis was performed on Agilent 1260 series. Unless otherwise noted, all reagents were purchased from commercial suppliers and used without purification. All air- and moisture-sensitive manipulations were carried out with standard Schlenk techniques under nitrogen or in a glove box under argon. Anhydrous toluene and THF (Tetrahydrofuran) were distilled from sodium benzophenone prior to use. Anhydrous DCE and 1, 4-dioxane was distilled from calcium hydride and stored under argon.

## 2. Screening of the reaction conditions

## 1) Table S1. Screening of acids

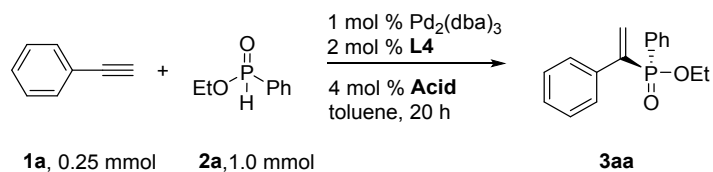

| entry           | Acid       | T/°C | <b>3aa</b> (yield %, ee %) |
|-----------------|------------|------|----------------------------|
| 1               | <b>A1</b>  | 60   | 70, 83                     |
| 2               | <b>A2</b>  | 60   | 44, 76                     |
| 3               | <b>A3</b>  | 60   | 44, 84                     |
| 4               | <b>A4</b>  | 60   | 65, 77                     |
| 5 <sup>b</sup>  | <b>A5</b>  | 70   | 50, 57                     |
| 6 <sup>b</sup>  | <b>A6</b>  | 70   | 56, 56                     |
| 7 <sup>b</sup>  | <b>A7</b>  | 70   | 50, 64                     |
| 8 <sup>b</sup>  | <b>A8</b>  | 70   | 55, 72                     |
| 9 <sup>b</sup>  | <b>A9</b>  | 70   | 92, 77                     |
| 10 <sup>b</sup> | <b>A10</b> | 70   | 76, 84                     |
| 11 <sup>b</sup> | <b>A10</b> | 60   | 44, 83                     |
| 12 <sup>b</sup> | <b>A11</b> | 70   | 57, 45                     |
| 13 <sup>b</sup> | <b>A12</b> | 70   | 20, 81                     |
| 14 <sup>b</sup> | <b>A13</b> | 70   | 54, 80                     |

<sup>a</sup>Condition: 1 mol % Pd<sub>2</sub>(dba)<sub>3</sub>, 2 mol % **L4**, and 4 mol % **Acid** in toluene were stirred for 10 min in argon atmosphere. 0.25 mmol alkyne and 1 mmol ethyl phenylphosphinate were added. The mixture was stirred under argon atmosphere for 20 h. <sup>b</sup> 24 h.

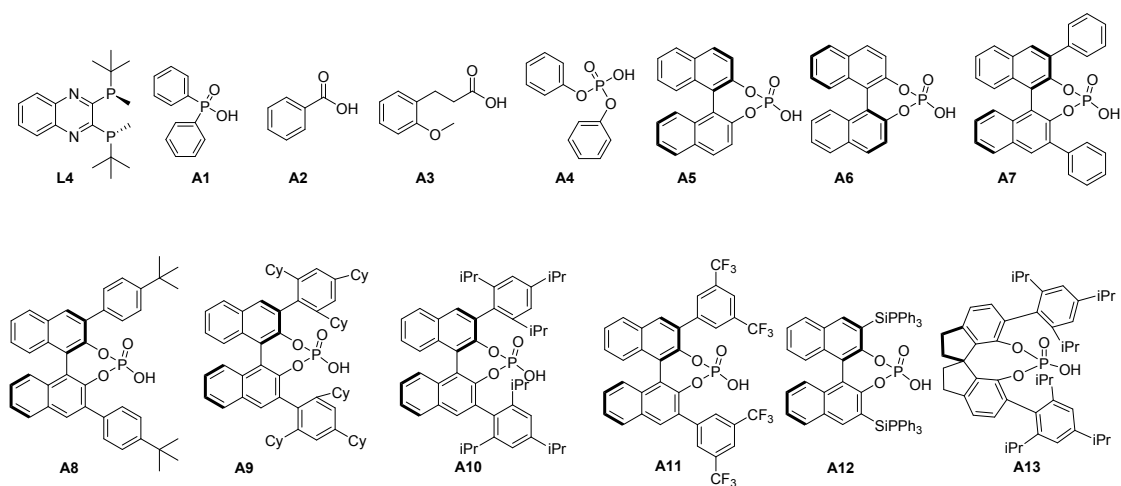

## 2) Table S2. Screening of the ratio of 1a/2a

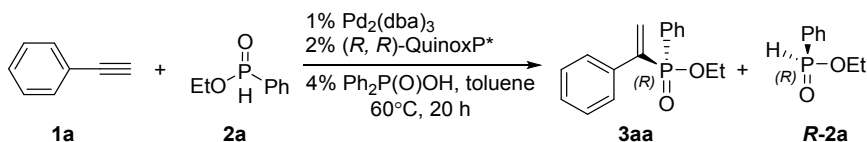

| entry | Alkyne/P-H | T/°C | <b>R-2a</b> (yield %, ee%) | <b>3aa</b> (yield %, ee%) | <b>S</b> |
|-------|------------|------|----------------------------|---------------------------|----------|
| 1     | 1/1        | 60   | 40, 61                     | 50, 55                    | 6        |
| 2     | 3/1        | 60   | 16, 53                     | 51, 59                    | 6        |
| 3     | 1/1        | 50   | 72, 16                     | 18, 74                    | 8        |
| 4     | 1/1        | 40   | 63, 7                      | 9, 80                     | 10       |
| 5     | 1/3        | 60   | -                          | 59, 78                    | -        |
| 6     | 1/4        | 60   | -                          | 70, 83                    | -        |
| 7     | 1/6        | 60   | -                          | 34, 85                    | -        |

<sup>a</sup>Condition: 1 mol % Pd<sub>2</sub>(dba)<sub>3</sub>, 2 mol % (R, R)-QuinoxP, and 4 mol % diphenylphosphinic acid in 1mL toluene were stirred for 10 min in argon atmosphere. Alkynes and ethyl phenylphosphinates were added, and the mixture was stirred at 60 °C for 20h.

### 3. Typical procedure for hydrophosphination of alkynes

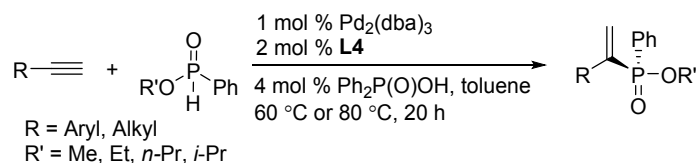

An oven-dried Schlenk tube containing a Teflon-coated stir bar was charged with 1 mol % Pd<sub>2</sub>(dba)<sub>3</sub> (2.3 mg), 2 mol % (R, R)-QuinoxP\* (1.7 mg), 4 mol % diphenylphosphinic acid (2.2 mg) in 1 mL toluene under argon atmosphere and stirred at room temperature for 10 min. Then, 0.25 mmol alkynes and 1 mmol H-phosphinate were added and the mixture was stirred at 60 °C or 80 °C for 20 h. After removal of the solvent, the residues were passed through a short silica chromatography (EA / PE = 1:3) to afford the desired product.

### 4. Gram-scale alkenylphosphinate synthesis

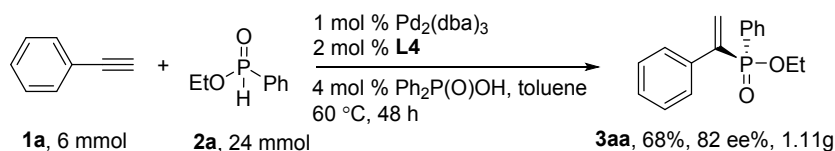

An oven-dried Schlenk tube containing a Teflon-coated stir bar was charged with 1 mol % Pd<sub>2</sub>(dba)<sub>3</sub> (54.9 mg), 2 mol % (R, R)-QuinoxP\* (40.0 mg), 4 mol % diphenylphosphinic acid (52.3 mg) in 24 mL toluene under argon atmosphere and stirred at room temperature for 10 min. Then, 6.0 mmol alkynes



(616 mg) and 24 mmol ethyl phenylphosphinate (4.08 g) were added and the mixture was stirred at 60 °C for 48 h. After removal of the solvent, the residues were passed through a short silica chromatography (EA / PE = 1:3) to afford the desired product **3aa** (1.11 g, 68% yield). The enantioselective excess of the product was determined to be 82% ee by chiral HPLC.

## 5. Synthetic transformation of the products

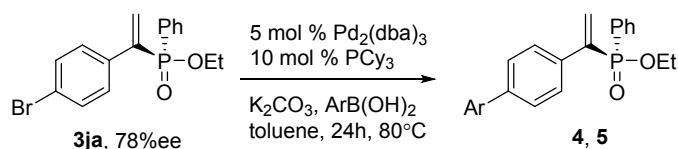

An oven-dried Schlenk tube containing a Teflon-coated stir bar was charged with 5 mol %  $\text{Pd}_2(\text{dba})_3$  (4.6 mg), 10 mol %  $\text{PCy}_3$  (2.8 mg), 2 eq  $\text{K}_2\text{CO}_3$  (0.2 mmol) in 1 mL toluene under argon atmosphere and stirred at room temperature for 10 min. Then, 0.1 mmol **3ja** (35.0 mg) and 0.2 mmol  $\text{ArB}(\text{OH})_2$  were added and the mixture was stirred at 80 °C for 20 h. After removal of the solvent, the residues were passed through a short silica chromatography (EA / PE = 1:3) to afford the desired product **4** (98%, 77% ee) and **5** (75%, 77% ee).

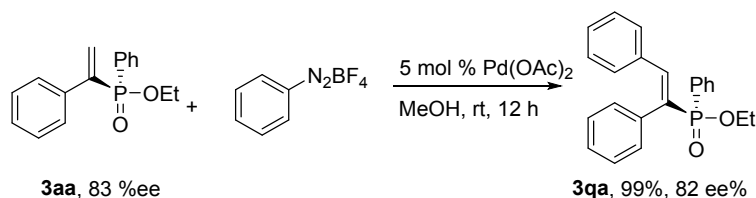

An oven-dried Schlenk tube containing a Teflon-coated stir bar was charged with 5 mol %  $\text{Pd}(\text{OAc})_2$  (1.1 mg) in 1 mL  $\text{CH}_3\text{OH}$  under argon atmosphere. Then, 0.1 mmol **3aa** (27.2 mg) and 0.12 mmol  $\text{PhN}_2\text{BF}_4$  (23 mg) were added and the mixture was stirred at rt for 12 h. After removal of the solvent, the residues were passed through a short silica chromatography (EA / PE = 1:3) to afford the desired product **3qa** (34.7 mg, 99% yield, 82% ee).

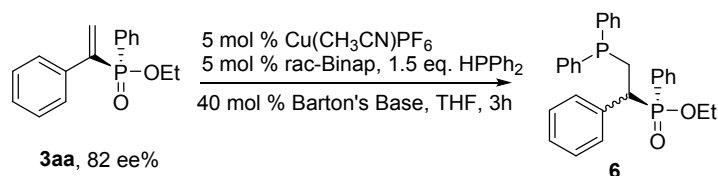

An oven-dried Schlenk tube containing a Teflon-coated stir bar was charged with  $[\text{Cu}(\text{CH}_3\text{CN})_4]\text{PF}_6$

(1.8 mg) and rac-Binap (3.1 mg) in a glove box under argon atmosphere. Anhydrous THF (1.0 mL, 0.10 M) was added. The mixture was stirred at room temperature for 15 minutes. Then **3aa** (27.2 mg) and HPPH<sub>2</sub> (28.0 mg) were added sequentially. Then the Schlenk tube was taken out of the glove box. After the mixture was cooled to 0 °C, Barton's Base (8 μL) was added. The resulting reaction mixture was stirred at 0 °C for 3 hours. After solvent was removed under reduced pressure, the residue was purified by silica gel column chromatography (EA / PE = 1:3) to give the desired product **6** (42.0 mg, 92% yield, major 79% ee, minor 79% ee).

## 6. Deuterium labelling experiment

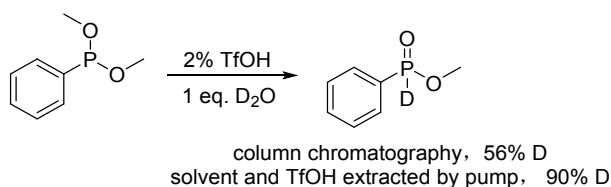

To an oven-dried vial fitted with a stirrer bar was added dimethyl phenylphosphonite (1.70 g, 10 mmol), 1 equiv. H<sub>2</sub>O (180 uL), trifluoromethanesulfonic acid (18 uL, 2 mol%) under argon atmosphere. The tube was then sealed, slightly shaken at room temperature, in 5 minutes. Solvent and trifluoromethanesulfonic acid were extracted by pump. Colorless oil. <sup>1</sup>H NMR (400 MHz, CDCl<sub>3</sub>): δ 7.82-7.71 (m, 2H), 7.63-7.55 (m, 2H), 7.55-7.46 (m, 2H), 3.82-3.73 (m, 3H). <sup>13</sup>C NMR (100 MHz, CDCl<sub>3</sub>): δ 133.2 (t, *J* = 2.8), 130.9 (t, *J* = 11.8), 128.7 (t, *J* = 13.9), 52.0 (d, *J* = 6.5 Hz). <sup>31</sup>P NMR (160 MHz, CDCl<sub>3</sub>): δ 26.6 (t, *J* = 85.9).

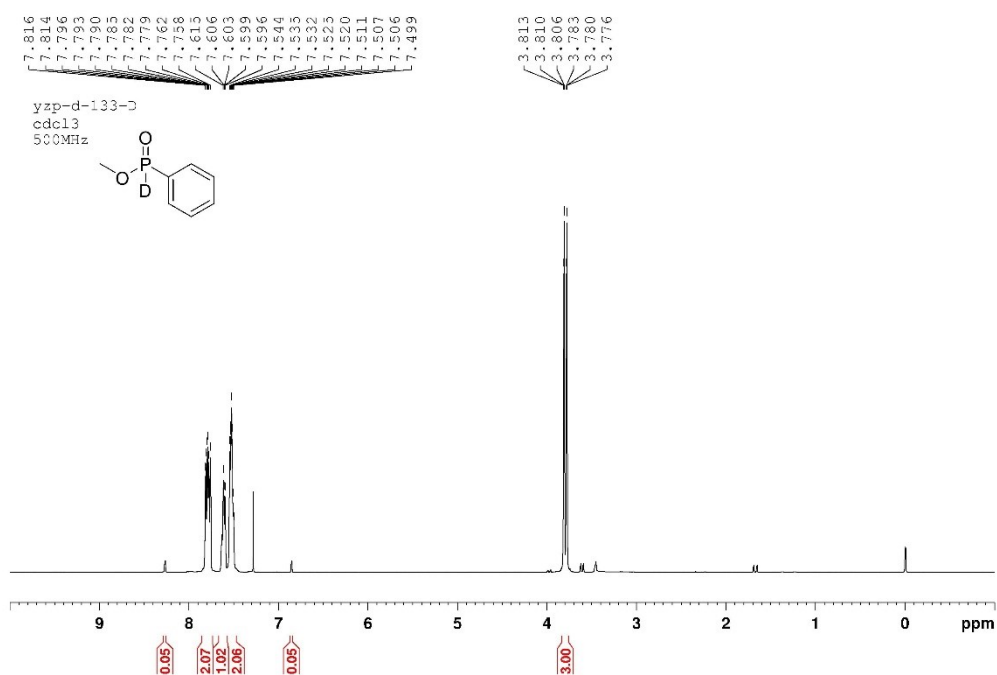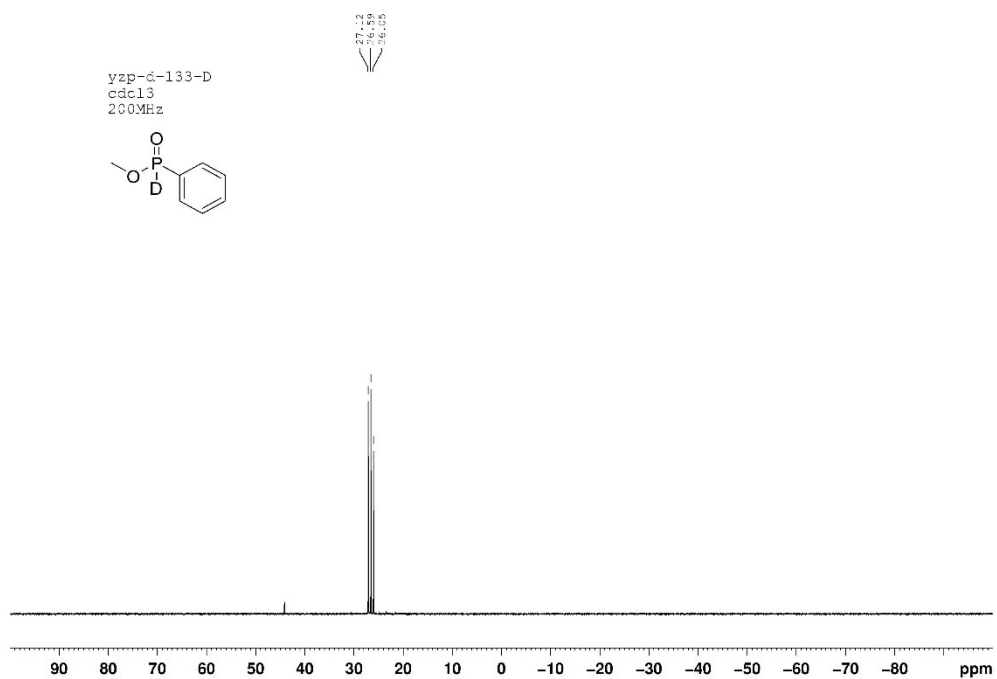

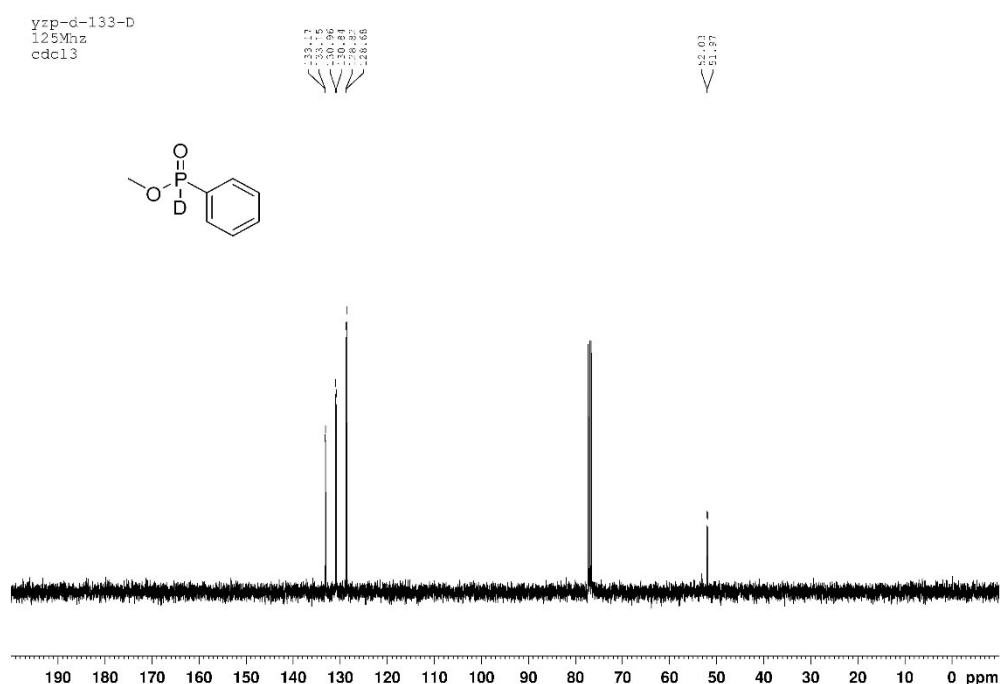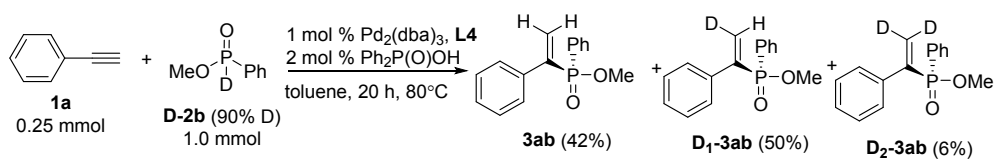

General procedure was used with phenylacetylene (25.5 mg, 0.25 mmol, 1 equiv) and D-P(O)(OMe)Ph (156 mg, 1 mmol, 4 equiv) at 80 °C for 20 h to afford desired product **3ab** as colorless oil (44.0 mg, 73% yield). <sup>1</sup>H NMR (500 MHz, CDCl<sub>3</sub>) δ 7.76 – 7.66 (m, 2H), 7.53 – 7.46 (m, 1H), 7.45 – 7.34 (m, 4H), 7.31 – 7.25 (m, 3H), 6.26 (dd, *J* = 20.1, 1.4 Hz, 0.43H), 6.13 (dd, *J* = 41.0, 1.4 Hz, 0.43H), 6.11 (d, *J* = 40.9 Hz, 0.5H), 3.74 (d, *J* = 11.1 Hz, 3H). <sup>31</sup>P NMR (200 MHz, CDCl<sub>3</sub>) δ 32.7. <sup>13</sup>C NMR (125 MHz, CDCl<sub>3</sub>) δ 142.6 (dd, *J* = 125.1, 14.0 Hz), 137.0 (dd, *J* = 11.6, 4.0 Hz), 132.3 (d, *J*<sub>CP</sub> = 2.8 Hz), 131.9 (d, *J*<sub>CP</sub> = 10.1 Hz), 131.7 (d, *J*<sub>CP</sub> = 8.6 Hz), 129.7 (d, *J*<sub>CP</sub> = 135.3 Hz), 128.4 (d, *J*<sub>CP</sub> = 13.2 Hz), 128.3, 128.1, 127.8 (d, *J*<sub>CP</sub> = 4.7 Hz), 51.5 (d, *J*<sub>CP</sub> = 6.2 Hz).

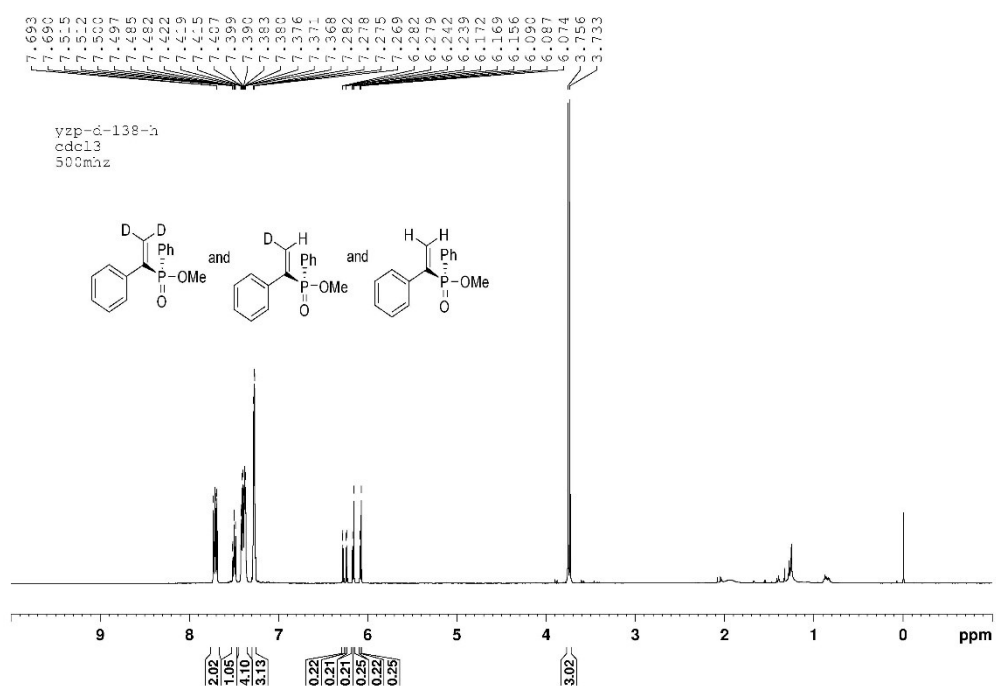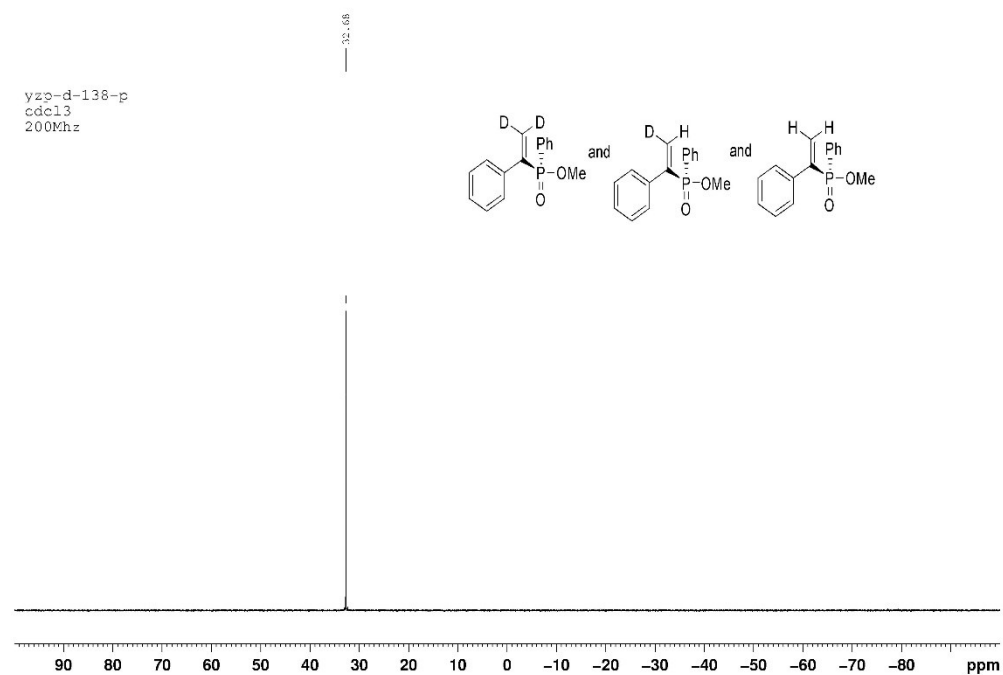

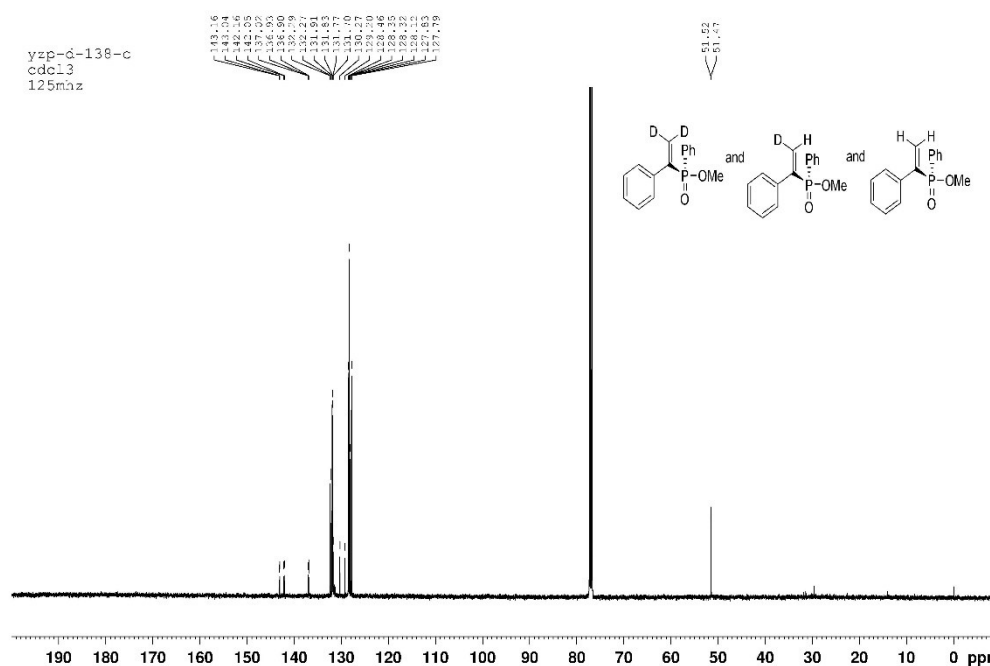

## 7. Analytic data for the products

### Ethyl phenyl(1-phenylvinyl)phosphinate (**3aa**)

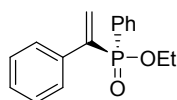

General procedure was used with phenylacetylene (25.5 mg, 0.25 mmol, 1 equiv) and ethyl phenylphosphinates (170 mg, 1 mmol, 4 equiv) at 60 °C for 20 h to afford **3aa** as colorless oil (47.6 mg, 70% yield, 83% ee).  $[\alpha]_D^{20} = 3.4$  (c 1.0,  $\text{CHCl}_3$ ).  $^1\text{H}$  NMR (500 MHz,  $\text{CDCl}_3$ )  $\delta$  7.78 – 7.67 (m, 2H), 7.54 – 7.46 (m, 1H), 7.44 – 7.36 (m, 4H), 7.31 – 7.26 (m, 3H), 6.27 (dd,  $J = 20.0, 1.5$  Hz, 1H), 6.13 (dd,  $J = 40.7, 1.5$  Hz, 1H), 4.20 – 4.04 (m, 2H), 1.34 (t,  $J = 7.1$  Hz, 3H).  $^{31}\text{P}$  NMR (200 MHz,  $\text{CDCl}_3$ )  $\delta$  30.8.  $^{13}\text{C}$  NMR (125 MHz,  $\text{CDCl}_3$ )  $\delta$  143.0 (d,  $J_{\text{CP}} = 124.7$  Hz), 137.0 (d,  $J_{\text{CP}} = 11.8$  Hz), 132.1 (d,  $J_{\text{CP}} = 2.7$  Hz), 131.7 (d,  $J_{\text{CP}} = 10.0$  Hz), 131.4 (d,  $J_{\text{CP}} = 8.3$  Hz), 130.4 (d,  $J_{\text{CP}} = 135.3$  Hz), 128.3 (d,  $J_{\text{CP}} = 18.2$  Hz), 128.2 (d,  $J_{\text{CP}} = 5.3$  Hz), 128.0, 127.8 (d,  $J_{\text{CP}} = 5.1$  Hz), 61.1 (d,  $J_{\text{CP}} = 6.0$  Hz), 16.4 (d,  $J_{\text{CP}} = 6.5$  Hz). The enantiomeric excess was determined by Daicel Chiralcel OD-H (0.46 cm x 25 cm), Hexanes / IPA = 98 / 2, 1.0 mL/min,  $\lambda = 254$  nm,  $t$  (major) = 17.0 min,  $t$  (minor) = 18.5 min. HRMS (ESI-ion trap)  $m/z$ :  $[\text{M}+\text{H}]^+$  calcd for  $\text{C}_{16}\text{H}_{18}\text{O}_2\text{P}$ , 273.1039; found 273.1036.

### Ethyl phenyl(1-(*p*-tolyl)vinyl)phosphinate (**3ba**)

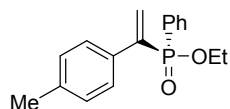

General procedure was used with 4-ethynyltoluene (29.0 mg, 0.25 mmol, 1 equiv) and ethyl phenylphosphinate (170 mg, 1 mmol, 4 equiv) at 60 °C for 20 h to afford **3ba** as colorless oil (50.0 mg, 70% yield, 82% ee).  $[\alpha]^{20}_D = 1.9$  (c 1.0, CHCl<sub>3</sub>). <sup>1</sup>H NMR (500 MHz, CDCl<sub>3</sub>) δ 7.76 – 7.66 (m, 2H), 7.53 – 7.44 (m, 1H), 7.43 – 7.34 (m, 2H), 7.32 – 7.26 (m, 2H), 7.12 – 7.04 (m, 2H), 6.23 (dd, *J* = 19.9, 1.5 Hz, 1H), 6.10 (dd, *J* = 40.9, 1.5 Hz, 1H), 4.18 – 4.01 (m, 2H), 2.30 (s, 3H), 1.32 (t, *J* = 7.1 Hz, 3H). <sup>31</sup>P NMR (200 MHz, CDCl<sub>3</sub>) δ 31.0. <sup>13</sup>C NMR (125 MHz, CDCl<sub>3</sub>) δ 142.7 (d, *J*<sub>CP</sub> = 124.5 Hz), 137.9, 134.1 (d, *J*<sub>CP</sub> = 11.8 Hz), 132.1 (d, *J*<sub>CP</sub> = 2.8 Hz), 131.8 (d, *J*<sub>CP</sub> = 9.9 Hz), 130.8 (d, *J*<sub>CP</sub> = 8.7 Hz), 130.6 (d, *J*<sub>CP</sub> = 134.6 Hz), 129.0, 128.3 (d, *J*<sub>CP</sub> = 12.8 Hz), 127.6 (d, *J*<sub>CP</sub> = 4.9 Hz), 61.1 (d, *J*<sub>CP</sub> = 5.8 Hz), 21.1, 16.4 (d, *J*<sub>CP</sub> = 6.6 Hz). The enantiomeric excess was determined by Daicel Chiralcel OD-H (0.46 cm x 25 cm), Hexanes / IPA = 98 / 2, 1.0 mL/min, λ = 254 nm, t (major) = 15.5 min, t (minor) = 17.1 min. HRMS (ESI-ion trap) *m/z*: [M+H]<sup>+</sup> calcd for C<sub>17</sub>H<sub>20</sub>OP, 287.1195 ; found 287.1194.

### Ethyl phenyl(1-(*m*-tolyl)vinyl)phosphinate (**3ca**)

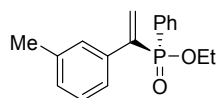

General procedure was used with 3-ethynyltoluene (29.0 mg, 0.25 mmol, 1 equiv) and ethyl phenylphosphinate (170 mg, 1 mmol, 4 equiv) 60 °C for 20 h to afford **3ca** as colorless oil (50.0 mg, 70% yield, 81% ee).  $[\alpha]^{20}_D = 3.7$  (c 1.0, CHCl<sub>3</sub>). <sup>1</sup>H NMR (500 MHz, CDCl<sub>3</sub>) δ 7.76 – 7.68 (m, 2H), 7.52 – 7.45 (m, 1H), 7.44 – 7.36 (m, 2H), 7.22 – 7.10 (m, 3H), 7.09 – 7.04 (m, 1H), 6.22 (dd, *J* = 20, 1.5 Hz, 1H), 6.09 (dd, *J* = 40.9, 1.5 Hz, 1H), 4.19 – 3.97 (m, 2H), 2.29 (s, 3H), 1.32 (t, *J* = 7.0 Hz, 3H). <sup>31</sup>P NMR (200 MHz, CDCl<sub>3</sub>) δ 30.9. <sup>13</sup>C NMR (125 MHz, CDCl<sub>3</sub>) δ 143.1 (d, *J*<sub>CP</sub> = 124.9 Hz), 137.8, 137.0 (d, *J*<sub>CP</sub> = 11.7 Hz), 132.1 (d, *J*<sub>CP</sub> = 2.7 Hz), 131.8 (d, *J*<sub>CP</sub> = 9.7 Hz), 131.2 (d, *J*<sub>CP</sub> = 8.4 Hz), 130.5 (d, *J*<sub>CP</sub> = 134.3 Hz), 128.8, 128.5 (d, *J*<sub>CP</sub> = 5.2 Hz), 128.3 (d, *J*<sub>CP</sub> = 15.6 Hz), 128.1, 124.9 (d, *J*<sub>CP</sub> = 4.6 Hz), 61.1 (d, *J*<sub>CP</sub> = 5.9 Hz), 21.35, 16.4 (d, *J*<sub>CP</sub> = 6.4 Hz). The enantiomeric excess was determined by Daicel Chiralcel AD-H (0.46 cm x 25 cm), Hexanes / IPA = 98 / 2, 1.0 mL/min, λ = 254 nm, t (minor) = 19.3 min, t (major) = 23.5 min. HRMS (ESI-ion trap) *m/z*: [M+H]<sup>+</sup> calcd for C<sub>17</sub>H<sub>20</sub>OP, 287.1195; found 287.1194.

### Ethyl phenyl(1-(*o*-tolyl)vinyl)phosphinate (**3da**)

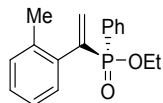

General procedure was used with 2-ethynyltoluene (29.0 mg, 0.25 mmol, 1 equiv) and ethyl phenylphosphinate (170 mg, 1 mmol, 4 equiv) at 60 °C for 20 h to afford **3da** as colorless oil (65.0 mg, 91% yield, 30% ee).  $[\alpha]_D^{20} = 5.0$  (c 1.0, CHCl<sub>3</sub>). <sup>1</sup>H NMR (500 MHz, CDCl<sub>3</sub>) δ 7.61 – 7.51 (m, 2H), 7.53–7.47 (m, 1H), 7.40 – 7.29 (m, 2H), 7.2 – 7.14 (m, 1H), 7.14 – 7.05 (m, 2H), 7.04 – 6.95 (m, 1H), 6.41 (dd, *J* = 20.5, 1.9 Hz, 1H), 5.82 (dd, *J* = 42.2, 1.9 Hz, 1H), 4.18 – 4.07 (m, 1H), 4.04 – 3.91 (m, 1H), 1.97 (s, 3H), 1.32 (t, *J* = 7.01 Hz, 3H). <sup>31</sup>P NMR (200 MHz, CDCl<sub>3</sub>) δ 29.6. <sup>13</sup>C NMR (125 MHz, CDCl<sub>3</sub>) δ 143.3 (d, *J*<sub>CP</sub> = 125.4 Hz), 136.4 (d, *J*<sub>CP</sub> = 9.4 Hz), 136.3 (d, *J*<sub>CP</sub> = 4.6 Hz), 132.3 (d, *J*<sub>CP</sub> = 8.6 Hz), 132.1, 132.0, 130.0, 129.8 (d, *J*<sub>CP</sub> = 132.4 Hz), 129.3 (d, *J*<sub>CP</sub> = 3.2 Hz), 128.1 (d, *J*<sub>CP</sub> = 12.6 Hz), 127.7 (d, *J*<sub>CP</sub> = 2.1 Hz), 125.0, 61.0 (d, *J*<sub>CP</sub> = 6.0 Hz), 19.6, 16.3 (d, *J*<sub>CP</sub> = 6.7 Hz). The enantiomeric excess was determined by Daicel Chiralcel OD-H (0.46 cm x 25 cm), Hexanes / IPA = 98 / 2, 1.0 mL/min, λ = 254 nm, t (major) = 12.4 min, t (minor) = 13.2 min. HRMS (ESI-ion trap) *m/z*: [M+H]<sup>+</sup> calcd for C<sub>17</sub>H<sub>20</sub>OP, 287.1195; found 287.1194.

### Ethyl (1-(4-ethylphenyl)vinyl)(phenyl)phosphinate (**3ea**)

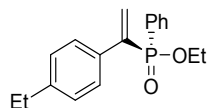

General procedure was used with 4-ethylphenylacetylene (32.5 mg, 0.25 mmol, 1 equiv) and ethyl phenylphosphinate (170 mg, 1 mmol, 4 equiv) at 60 °C for 20 h to afford **3ea** as colorless oil (54.0 mg, 72% yield, 83% ee).  $[\alpha]_D^{20} = 2.3$  (c 1.0, CHCl<sub>3</sub>). <sup>1</sup>H NMR (500 MHz, CDCl<sub>3</sub>) δ 7.80 – 7.63 (m, 2H), 7.47 (td, *J* = 7.5, 1.3 Hz, 1H), 7.40 (td, *J* = 7.8, 3.5 Hz, 2H), 7.32 (m, 2H), 7.09 (m, 2H), 6.22 (dd, *J* = 19.9, 1.5 Hz, 1H), 6.10 (dd, *J* = 40.9, 1.5 Hz, 1H), 4.17 – 3.97 (m, 2H), 2.59 (q, *J* = 7.6 Hz, 2H), 1.31 (t, *J* = 7.1 Hz, 3H), 1.19 (t, *J* = 7.6 Hz, 3H). <sup>31</sup>P NMR (200 MHz, CDCl<sub>3</sub>) δ 31.1. <sup>13</sup>C NMR (125 MHz, CDCl<sub>3</sub>) δ 144.2, 142.6 (d, *J*<sub>CP</sub> = 124.7 Hz), 134.2 (d, *J*<sub>CP</sub> = 11.8 Hz), 132.0 (d, *J*<sub>CP</sub> = 2.8 Hz), 131.7 (d, *J*<sub>CP</sub> = 10.2 Hz), 130.9 (d, *J*<sub>CP</sub> = 8.6 Hz), 130.5 (d, *J*<sub>CP</sub> = 135.2 Hz), 128.0 (d, *J*<sub>CP</sub> = 80.0 Hz), 127.7, 127.6 (d, *J*<sub>CP</sub> = 71.8 Hz), 61.0 (d, *J*<sub>CP</sub> = 6.4 Hz), 28.4, 16.3 (d, *J*<sub>CP</sub> = 6.4 Hz), 15.3. The enantiomeric excess was determined by Daicel Chiralcel OD-H (0.46 cm x 25 cm), Hexanes / IPA = 98



/ 2, 1.0 mL/min,  $\lambda$  = 254 nm, t (major) = 13.4 min, t (minor) = 14.2 min. HRMS (ESI-ion trap)  $m/z$ :  $[M+H]^+$  calcd for  $C_{18}H_{22}O_2P$ , 301.1352; found 301.1353.

### Ethyl (1-(4-(*tert*-butyl)phenyl)vinyl)(phenyl)phosphinate (**3fa**)

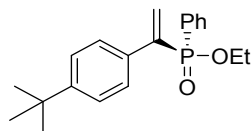

General procedure was used with 4-(*tert*-butyl)phenylacetylene (39.5 mg, 0.25 mmol, 1 equiv) and ethyl phenylphosphinate (170 mg, 1 mmol, 4 equiv) at 60 °C for 20 h to afford **3fa** as colorless oil (68.9 mg, 84% yield, 81% ee).  $[\alpha]_D^{20}$  = 0.9 (c 1.0,  $CHCl_3$ ).  $^1H$  NMR (400 MHz,  $CDCl_3$ )  $\delta$  7.80 – 7.70 (m, 2H), 7.57 – 7.47 (m, 1H), 7.40 (td,  $J$  = 7.4, 3.4 Hz, 2H), 7.38 – 7.33 (m, 2H), 7.33 – 7.26 (m, 2H), 6.22 (d,  $J$  = 20.0 Hz, 1H), 6.13 (d,  $J$  = 40.9 Hz, 1H), 4.16 – 4.03 (m, 2H), 1.32 (t,  $J$  = 7.0 Hz, 3H), 1.27 (d,  $J$  = 10.3 Hz, 9H).  $^{31}P$  NMR (160 MHz,  $CDCl_3$ )  $\delta$  31.1.  $^{13}C$  NMR (100 MHz,  $CDCl_3$ )  $\delta$  151.1, 142.8 (d,  $J_{CP}$  = 124.6 Hz), 134.0 (d,  $J_{CP}$  = 11.7 Hz), 132.0 (d,  $J_{CP}$  = 2.7 Hz), 131.8, 131.7, 130.9 (d,  $J_{CP}$  = 135.0 Hz), 130.8 (d,  $J_{CP}$  = 8.4 Hz), 128.3 (d,  $J_{CP}$  = 13.1 Hz), 127.5 (d,  $J_{CP}$  = 5.0 Hz), 125.2, 61.1 (d,  $J_{CP}$  = 6.2 Hz), 34.5, 31.2, 16.4 (d,  $J_{CP}$  = 6.4 Hz). The enantiomeric excess was determined by Daicel Chiralcel OD-H (0.46 cm x 25 cm), Hexanes / IPA = 98 / 2, 1.0 mL/min,  $\lambda$  = 254 nm, t (minor) = 11.2 min, t (major) = 12.1 min. HRMS (ESI-ion trap)  $m/z$ :  $[M+H]^+$  calcd for  $C_{20}H_{26}O_2P$ , 329.1665; found 329.1665.

### Ethyl (1-(4-pentylphenyl)vinyl)(phenyl)phosphinate (**3ga**)

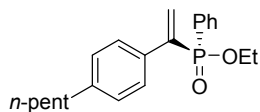

General procedure was used with 1-ethynyl-4-pentylbenzene (43.0 mg, 0.25 mmol, 1 equiv) and ethyl phenylphosphinate (170 mg, 1 mmol, 4 equiv) at 60 °C for 20 h to afford **3ga** as colorless oil (46.1 mg, 54% yield, 82% ee).  $[\alpha]_D^{20}$  = 1.8 (c 1.0,  $CHCl_3$ ).  $^1H$  NMR (500 MHz,  $CDCl_3$ )  $\delta$  7.81 – 7.66 (m, 2H), 7.44 – 7.51 (m, 1H), 7.41 (td,  $J$  = 7.6, 3.5 Hz, 2H), 7.27 – 7.33 (m, 2H), 7.04 – 7.12 (m, 2H), 6.25 (dd,  $J$  = 20.0, 1.4 Hz, 1H), 6.13 (dd,  $J$  = 40.9, 1.4 Hz, 1H), 4.21 – 4.00 (m, 2H), 2.65 – 2.49 (m, 2H), 1.59 (m, 2H), 1.32 (m, 7H), 0.89 (t,  $J$  = 7.0 Hz, 3H).  $^{31}P$  NMR (200 MHz,  $CDCl_3$ )  $\delta$  31.1.  $^{13}C$  NMR (125 MHz,  $CDCl_3$ )  $\delta$  142.9, 142.7 (d,  $J_{CP}$  = 124.6 Hz), 134.2 (d,  $J_{CP}$  = 11.7 Hz), 132.0 (d,  $J_{CP}$  = 2.7 Hz),

131.7 (d,  $J_{CP}$  = 10.1 Hz), 130.8 (d,  $J_{CP}$  = 8.3 Hz), 130.6 (d,  $J_{CP}$  = 134.8 Hz), 128.3, 128.2 (d,  $J_{CP}$  = 13.0 Hz), 127.6 (d,  $J_{CP}$  = 5.2 Hz), 61.1 (d,  $J_{CP}$  = 5.9 Hz), 35.5, 31.4, 30.9, 22.4, 16.4 (d,  $J_{CP}$  = 6.7 Hz), 14.0. The enantiomeric excess was determined by Daicel Chiralcel OD-H (0.46 cm x 25 cm), Hexanes / IPA = 95 / 5, 1.0 mL/min,  $\lambda$  = 254 nm,  $t$  (major) = 8.3 min,  $t$  (minor) = 8.8 min. HRMS (ESI-ion trap)  $m/z$ :  $[M+H]^+$  calcd for  $C_{21}H_{28}O_2P$ , 343.1821; found 343.1822.

### Ethyl (1-(4-fluorophenyl)vinyl)(phenyl)phosphinate (**3ha**)

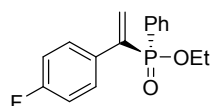

General procedure was used with 4-fluorophenylacetylene (30.0 mg, 0.25 mmol, 1 equiv) and ethyl phenylphosphinate (170 mg, 1 mmol, 4 equiv) at 80 °C for 20 h to afford **3ha** as colorless oil (55.1 mg, 76% yield, 77% ee).  $[\alpha]^{20}_D$  = -0.5 (c 1.0,  $CHCl_3$ ).  $^1H$  NMR (500 MHz,  $CDCl_3$ )  $\delta$  7.81 – 7.57 (m, 2H), 7.57 – 7.44 (m, 1H), 7.44 – 7.30 (m, 4H), 6.95 (t,  $J$  = 8.6 Hz, 2H), 6.21 (d,  $J$  = 19.8 Hz, 1H), 6.06 (d,  $J$  = 40.6 Hz, 1H), 4.19 – 3.94 (m, 2H), 1.37 – 1.24 (t,  $J$  = 7.0 Hz, 3H).  $^{31}P$  NMR (200 MHz,  $CDCl_3$ )  $\delta$  30.6.  $^{13}C$  NMR (125 MHz,  $CDCl_3$ )  $\delta$  162.6 (d,  $J$  = 248.1 Hz), 142.1 (d,  $J$  = 125.0 Hz), 133.0 (dd,  $J$  = 2.8, 11.8 Hz), 132.2 (d,  $J$  = 2.6 Hz), 131.8 (d,  $J$  = 10.2 Hz), 131.1 (d,  $J$  = 8.6 Hz), 130.9, 129.6 (dd,  $J$  = 5.3, 8.1 Hz), 128.4 (d,  $J$  = 12.9 Hz), 115.2 (d,  $J$  = 21.4 Hz), 61.2 (d,  $J$  = 6.0 Hz), 16.4 (d,  $J$  = 6.6 Hz).  $^{19}F$  NMR (376 MHz,  $CDCl_3$ )  $\delta$  -113.8. The enantiomeric excess was determined by Daicel Chiralcel AD-H (0.46 cm x 25 cm), Hexanes / IPA = 95 / 5, 1.0 mL/min,  $\lambda$  = 254 nm,  $t$  (minor) = 17.4 min,  $t$  (major) = 21.1 min. HRMS (ESI-ion trap)  $m/z$ :  $[M+H]^+$  calcd for  $C_{16}H_{17}FO_2P$ , 291.0945; found 291.0945.

### Ethyl (1-(4-chlorophenyl)vinyl)(phenyl)phosphinate (**3ia**)

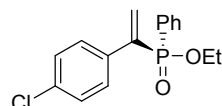

General procedure was used with 4-chlorophenylacetylene (34.1 mg, 0.25 mmol, 1 equiv) and ethyl phenylphosphinate (170 mg, 1 mmol, 4 equiv) at 80 °C for 20 h to afford **3ia** as yellow oil (54.3 mg, 71% yield, 83% ee).  $[\alpha]^{20}_D$  = -3.0 (c 1,  $CHCl_3$ ).  $^1H$  NMR (500 MHz,  $CDCl_3$ )  $\delta$  7.75 – 7.64 (m, 2H), 7.52 – 7.47 (m, 1H), 7.44 – 7.37 (m, 2H), 7.36 – 7.30 (m, 2H), 7.26 – 7.21 (m, 2H), 6.23 (dd,  $J$  = 19.8, 1.3 Hz, 1H), 6.08 (dd,  $J$  = 40.4, 1.3 Hz, 1H), 4.22 – 3.96 (m, 2H), 1.32 (t,  $J$  = 7.1 Hz, 3H).  $^{31}P$  NMR

(200 MHz, CDCl<sub>3</sub>)  $\delta$  30.4. <sup>13</sup>C NMR (125 MHz, CDCl<sub>3</sub>)  $\delta$  142.2 (d,  $J_{CP}$  = 126.0 Hz), 135.5 (d,  $J_{CP}$  = 12.0 Hz), 134.2, 132.3 (d,  $J_{CP}$  = 2.6 Hz), 131.8 (d,  $J_{CP}$  = 10.0 Hz), 131.5 (d,  $J_{CP}$  = 8.2 Hz), 130.1 (d,  $J_{CP}$  = 129.4 Hz), 128.8 (d,  $J_{CP}$  = 84.5 Hz), 128.7 (d,  $J_{CP}$  = 102.4 Hz), 128.5, 61.2 (d,  $J_{CP}$  = 5.9 Hz), 16.4 (d,  $J_{CP}$  = 6.5 Hz). The enantiomeric excess was determined by Daicel Chiralcel AD-H (0.46 cm x 25 cm), Hexanes / IPA = 95 / 5, 1.0 mL/min,  $\lambda$  = 254 nm, t (minor) = 19.7 min, t (major) = 25.9 min. HRMS (ESI-ion trap)  $m/z$ : [M+H]<sup>+</sup> calcd for C<sub>16</sub>H<sub>17</sub>ClO<sub>2</sub>P, 307.0649; found 307.0649.

### Ethyl (1-(4-bromophenyl)vinyl)(phenyl)phosphinate (3ja)

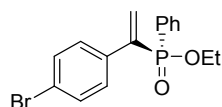

General procedure was used with 4-bromophenylacetylene (45.2 mg, 0.25 mmol, 1 equiv) and ethyl phenylphosphinate (170 mg, 1 mmol, 4 equiv) at 80 °C for 20 h to afford **3ja** as yellow oil (69 mg, 79% yield, 79% ee). [ $\alpha$ ]<sub>D</sub><sup>20</sup> = -3.7 (c 1, CHCl<sub>3</sub>). <sup>1</sup>H NMR (500 MHz, CDCl<sub>3</sub>)  $\delta$  7.72 (dd,  $J$  = 12.1, 7.6 Hz, 2H), 7.54 – 7.48 (m, 1H), 7.46 – 7.35 (m, 4H), 7.33 – 7.22 (m, 2H), 6.25 (d,  $J$  = 19.8 Hz, 1H), 6.10 (d,  $J$  = 40.3 Hz, 1H), 4.22 – 3.99 (m, 2H), 1.34 (t,  $J$  = 7.1 Hz, 3H). <sup>31</sup>P NMR (200 MHz, CDCl<sub>3</sub>)  $\delta$  30.2. <sup>13</sup>C NMR (125 MHz, CDCl<sub>3</sub>)  $\delta$  142.2 (d,  $J_{CP}$  = 126.5 Hz), 136.0 (d,  $J_{CP}$  = 11.7 Hz), 132.3 (d,  $J_{CP}$  = 2.7 Hz), 131.8 (d,  $J_{CP}$  = 9.9 Hz), 131.5, 131.4, 130.1 (d,  $J_{CP}$  = 135.2 Hz), 129.5 (d,  $J_{CP}$  = 4.9 Hz), 128.4 (d,  $J_{CP}$  = 13.0 Hz), 122.4, 61.3 (d,  $J_{CP}$  = 6.0 Hz), 16.4 (d,  $J_{CP}$  = 6.4 Hz). The enantiomeric excess was determined by Daicel Chiralcel AD-H (0.46 cm x 25 cm), Hexanes / IPA = 95 / 5, 1.0 mL/min,  $\lambda$  = 254 nm, t (minor) = 22.0 min, t (major) = 30.0 min. HRMS (ESI-ion trap)  $m/z$ : [M+H]<sup>+</sup> calcd for C<sub>16</sub>H<sub>17</sub>BrO<sub>2</sub>P, 351.0144; found 351.0144.

### Ethyl phenyl(1-(4-(trifluoromethyl)phenyl)vinyl)phosphinate (3ka)

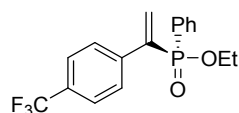

General procedure was used with 4-trifluoromethylphenylacetylene (42.5 mg, 0.25 mmol, 1 equiv) and ethyl phenylphosphinate (170 mg, 1 mmol, 4 equiv) at 80 °C for 20 h to afford **3ka** as yellow oil (35.8 mg, 42% yield, 82% ee). [ $\alpha$ ]<sub>D</sub><sup>20</sup> = -1.2 (c 1.0, CHCl<sub>3</sub>). <sup>1</sup>H NMR (500 MHz, CDCl<sub>3</sub>)  $\delta$  7.77 – 7.65

(m, 2H), 7.58 – 7.46 (m, 5H), 7.45 – 7.36 (m, 2H), 6.27 (dd,  $J = 19.9, 1.2$  Hz, 1H), 6.13 (dd,  $J = 40.1, 1.2$  Hz, 1H), 4.23 – 3.98 (m, 2H), 1.33 (t,  $J = 7.1$  Hz, 3H).  $^{31}\text{P}$  NMR (200 MHz,  $\text{CDCl}_3$ ) 30.1.  $^{13}\text{C}$  NMR (125 MHz,  $\text{CDCl}_3$ )  $\delta$  142.4 (d,  $J_{\text{CP}} = 126.3$  Hz), 140.8 (d,  $J_{\text{CP}} = 11.7$  Hz), 132.5 (d,  $J_{\text{CP}} = 2.2$  Hz), 132.4, 131.8 (d,  $J_{\text{CP}} = 10.4$  Hz), 130.1 (q,  $J_{\text{C-F}} = 32.8$  Hz), 129.9 (d,  $J_{\text{CP}} = 135.5$  Hz), 128.5 (d,  $J_{\text{CP}} = 13.4$  Hz), 128.2 (d,  $J_{\text{CP}} = 4.4$  Hz), 125.3 (q,  $J_{\text{C-F}} = 3.8$  Hz), 124.0 (q,  $J_{\text{C-F}} = 274.6$  Hz), 61.4 (d,  $J_{\text{CP}} = 5.7$  Hz), 16.4 (d,  $J_{\text{CP}} = 6.6$  Hz).  $^{19}\text{F}$  NMR (376 MHz,  $\text{CDCl}_3$ )  $\delta$  -62.7. The enantiomeric excess was determined by Daicel Chiralcel AD-H (0.46 cm x 25 cm), Hexanes / IPA = 95 / 5, 1.0 mL/min,  $\lambda = 254$  nm,  $t$  (minor) = 16.7 min,  $t$  (major) = 20.2 min. HRMS (ESI-ion trap)  $m/z$ :  $[\text{M}+\text{H}]^+$  calcd for  $\text{C}_{17}\text{H}_{17}\text{F}_3\text{O}_2\text{P}$ , 341.0913; found 341.0912.

### Ethyl (1-(4-methoxyphenyl)vinyl)(phenyl)phosphinate (**3la**)

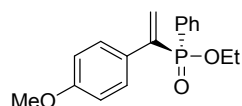

General procedure was used with 4-ethynylanisole (33.0 mg, 0.25 mmol, 1 equiv) and ethyl phenylphosphinate (170 mg, 1 mmol, 4 equiv) at 80 °C for 20 h to afford **3la** as yellow oil (70.9 mg, 94% yield, 63% ee).  $[\alpha]_{\text{D}}^{20} = 0.6$  (c 1.0,  $\text{CHCl}_3$ ).  $^1\text{H}$  NMR (500 MHz,  $\text{CDCl}_3$ )  $\delta$  7.76 – 7.69 (m, 2H), 7.52 – 7.45 (m, 1H), 7.40 (td,  $J = 7.6, 3.5$  Hz, 2H), 7.37 – 7.33 (m, 2H), 6.83 – 6.77 (m, 2H), 6.19 (dd,  $J = 19.9, 1.3$  Hz, 1H), 6.07 (dd,  $J = 41.0, 1.3$  Hz, 1H), 4.16 – 4.04 (m, 2H), 3.77 (s, 3H), 1.33 (t,  $J = 7.0$  Hz, 3H).  $^{31}\text{P}$  NMR (200 MHz,  $\text{CDCl}_3$ )  $\delta$  31.2.  $^{13}\text{C}$  NMR (125 MHz,  $\text{CDCl}_3$ )  $\delta$  159.5, 142.7 (d,  $J_{\text{CP}} = 124.9$  Hz), 132.1 (d,  $J_{\text{CP}} = 2.7$  Hz), 131.8 (d,  $J_{\text{CP}} = 10.0$  Hz), 131.2, 130.2 (d,  $J_{\text{CP}} = 8.6$  Hz), 129.4 (d,  $J_{\text{CP}} = 12.1$  Hz), 128.7 (d,  $J_{\text{CP}} = 98.1$  Hz), 128.6 (d,  $J_{\text{CP}} = 80.2$  Hz), 113.7, 61.1 (d,  $J_{\text{CP}} = 5.9$  Hz), 55.2, 16.4 (d,  $J_{\text{CP}} = 6.8$  Hz). The enantiomeric excess was determined by Daicel Chiralcel AD-H (0.46 cm x 25 cm), Hexanes / IPA = 90 / 10, 1.0 mL/min,  $\lambda = 254$  nm,  $t$  (minor) = 14.1 min,  $t$  (major) = 20.2 min. HRMS (ESI-ion trap)  $m/z$ :  $[\text{M}+\text{H}]^+$  calcd for  $\text{C}_{17}\text{H}_{20}\text{O}_3\text{P}$ , 303.1145; found 303.1144.

### Ethyl (1-(3-methoxyphenyl)vinyl)(phenyl)phosphinate (**3ma**)

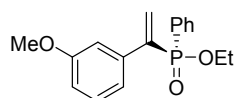

General procedure was used with 3-ethynylanisole (33.0 mg, 0.25 mmol, 1 equiv) and ethyl phenylphosphinate (170 mg, 1 mmol, 4 equiv) at 80 °C for 20 h to afford **3ma** as yellow oil (66.4 mg,

88% yield, 72% ee).  $[\alpha]_D^{20} = 4.0$  (c 1.0,  $\text{CHCl}_3$ ).  $^1\text{H}$  NMR (500 MHz,  $\text{CDCl}_3$ )  $\delta$  7.78 – 7.65 (m, 2H), 7.52 – 7.45 (m, 1H), 7.39 (td,  $J = 7.5, 3.5$  Hz, 2H), 7.17 (t,  $J = 7.9$  Hz, 1H), 6.95 (m, 1H), 6.92 (m, 1H), 6.81 (dd,  $J = 8.3, 2.4$  Hz, 1H), 6.27 (dd,  $J = 19.8, 1.5$  Hz, 1H), 6.12 (dd,  $J = 40.4, 1.5$  Hz, 1H), 4.16 – 4.04 (m, 2H), 3.72 (s, 3H), 1.32 (t,  $J = 7.0$  Hz, 3H).  $^{31}\text{P}$  NMR (200 MHz,  $\text{CDCl}_3$ )  $\delta$  30.5.  $^{13}\text{C}$  NMR (126 MHz,  $\text{CDCl}_3$ )  $\delta$  159.3, 143.0 (d,  $J_{\text{CP}} = 124.9$  Hz), 138.6 (d,  $J_{\text{CP}} = 11.8$  Hz), 132.2 (d,  $J_{\text{CP}} = 2.7$  Hz), 131.8 (d,  $J_{\text{CP}} = 10.0$  Hz), 131.6 (d,  $J_{\text{CP}} = 8.3$  Hz), 130.5 (d,  $J_{\text{CP}} = 135.0$  Hz), 128.8 (d,  $J_{\text{CP}} = 122.7$  Hz), 128.5, 120.4 (d,  $J_{\text{CP}} = 4.6$  Hz), 114.0, 113.3 (d,  $J_{\text{CP}} = 5.5$  Hz), 61.2 (d,  $J_{\text{CP}} = 5.6$  Hz), 55.2, 16.5 (d,  $J_{\text{CP}} = 6.4$  Hz). The enantiomeric excess was determined by Daicel Chiralcel OD-H (0.46 cm x 25 cm), Hexanes / IPA = 95 / 5, 1.0 mL/min,  $\lambda = 254$  nm, t (major) = 10.7 min, t (minor) = 11.5 min. HRMS (ESI-ion trap)  $m/z$ :  $[\text{M}+\text{H}]^+$  calcd for  $\text{C}_{17}\text{H}_{20}\text{O}_3\text{P}$ , 303.1145; found 303.1144.

### Ethyl (1-(3-chlorophenyl)vinyl)(phenyl)phosphinate (3na)

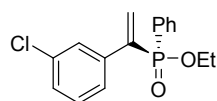

General procedure was used with 3-chlorophenylacetylene (34.1 mg, 0.25 mmol, 1 equiv) and ethyl phenylphosphinate (170 mg, 1 mmol, 4 equiv) at 80 °C for 20 h to afford **3na** as yellow oil (37.8 mg, 50% yield, 78% ee).  $[\alpha]_D^{20} = -3.6$  (c 1.0,  $\text{CHCl}_3$ ).  $^1\text{H}$  NMR (500 MHz,  $\text{CDCl}_3$ )  $\delta$  7.65 – 7.74 (m, 2H), 7.53 – 7.47 (m, 1H), 7.44 – 7.38 (m, 2H), 7.38 – 7.33 (m, 1H), 7.31 – 7.27 (m, 1H), 7.25 – 7.22 (m, 1H), 7.22 – 7.17 (m, 1H), 6.25 (dd,  $J = 19.8, 1.2$  Hz, 1H), 6.09 (dd,  $J = 40.2, 1.2$  Hz, 1H), 4.18 – 4.00 (m, 2H), 1.33 (t,  $J = 7.03$  Hz, 3H).  $^{31}\text{P}$  NMR (200 MHz,  $\text{CDCl}_3$ )  $\delta$  30.2.  $^{13}\text{C}$  NMR (125 MHz,  $\text{CDCl}_3$ )  $\delta$  142.2 (d,  $J_{\text{CP}} = 126.5$  Hz), 138.8 (d,  $J_{\text{CP}} = 12.0$  Hz), 134.1, 132.4 (d,  $J_{\text{CP}} = 2.8$  Hz), 132.0 (d,  $J_{\text{CP}} = 8.2$  Hz), 131.8 (d,  $J_{\text{CP}} = 10.1$  Hz), 130.0 (d,  $J_{\text{CP}} = 135.4$  Hz), 129.5, 128.4 (d,  $J_{\text{CP}} = 12.6$  Hz), 128.2, 127.9 (d,  $J_{\text{CP}} = 5.1$  Hz), 126.1 (d,  $J_{\text{CP}} = 4.5$  Hz), 61.3 (d,  $J_{\text{CP}} = 6.0$  Hz), 16.4 (d,  $J_{\text{CP}} = 6.6$  Hz). The enantiomeric excess was determined by Daicel Chiralcel AD-H (0.46 cm x 25 cm), Hexanes / IPA = 95 / 5, 1.0 mL/min,  $\lambda = 254$  nm, t (minor) = 14.2 min, t (major) = 16.0 min. HRMS (ESI-ion trap)  $m/z$ :  $[\text{M}+\text{H}]^+$  calcd for  $\text{C}_{16}\text{H}_{17}\text{ClO}_2\text{P}$ , 307.0649; found 307.0649.

### Ethyl phenyl(1-(thiophen-2-yl)vinyl)phosphinate (3oa)

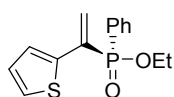

General procedure was used with 2-ethynylthiophene (27 mg, 0.25 mmol, 1 equiv) and ethyl phenylphosphinate (170 mg, 1 mmol, 4 equiv) at 80 °C for 20 h to afford **3oa** as yellow oil (50.7 mg, 73% yield, 84% ee).  $[\alpha]^{20}_{\text{D}} = 5.4$  (c 1.0,  $\text{CHCl}_3$ ).  $^1\text{H}$  NMR (500 MHz,  $\text{CDCl}_3$ )  $\delta$  7.84 – 7.68 (m, 2H), 7.54 – 7.46 (m, 2H), 7.44 – 7.39 (m, 2H), 7.25 – 7.21 (m, 1H), 7.21 – 7.16 (m, 1H), 6.25 (d,  $J = 22.4$  Hz, 1H), 6.19 (s, 1H), 4.18 – 4.07 (m, 2H), 1.35 (t,  $J = 6.9$  Hz, 3H).  $^{31}\text{P}$  NMR (200 MHz,  $\text{CDCl}_3$ )  $\delta$  30.7.  $^{13}\text{C}$  NMR (125 MHz,  $\text{CDCl}_3$ )  $\delta$  137.1 (d,  $J_{\text{CP}} = 81.1$  Hz), 136.6 (d,  $J_{\text{CP}} = 32.4$  Hz), 132.2 (d,  $J_{\text{CP}} = 2.8$  Hz), 131.6 (d,  $J_{\text{CP}} = 10.4$  Hz), 130.6 (d,  $J_{\text{CP}} = 136.2$  Hz), 129.4 (d,  $J_{\text{CP}} = 7.6$  Hz), 128.4 (d,  $J_{\text{CP}} = 12.8$  Hz), 126.5 (d,  $J_{\text{CP}} = 6.6$  Hz), 125.6, 123.9 (d,  $J_{\text{CP}} = 4.6$  Hz), 61.2 (d,  $J_{\text{CP}} = 5.6$  Hz), 16.4 (d,  $J_{\text{CP}} = 6.4$  Hz). The enantiomeric excess was determined by Daicel Chiralcel AD-H (0.46 cm x 25 cm), Hexanes / IPA = 95 / 5, 1.0 mL/min,  $\lambda = 254$  nm, t (minor) = 23.8 min, t (major) = 28.4 min. HRMS (ESI-ion trap)  $m/z$ :  $[\text{M}+\text{H}]^+$  calcd for  $\text{C}_{14}\text{H}_{16}\text{O}_2\text{PS}$ , 279.0603; found 279.0602.

### Ethyl phenyl(1-(pyridin-3-yl)vinyl)phosphinate (**3pa**)

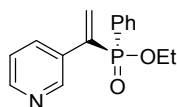

General procedure was used with 3-ethynylpyridine (25.7 mg, 0.25 mmol, 1 equiv) and ethyl phenylphosphinate (170 mg, 1 mmol, 4 equiv) at 80 °C for 20 h to afford **3pa** as yellow oil (30.0 mg, 44% yield, 86% ee).  $[\alpha]^{20}_{\text{D}} = -2.3$  (c 1.0,  $\text{CHCl}_3$ ).  $^1\text{H}$  NMR (500 MHz,  $\text{CDCl}_3$ )  $\delta$  8.53 (d,  $J = 21.0$  Hz, 2H), 7.82 – 7.73 (m, 1H), 7.73 – 7.63 (m, 2H), 7.53 – 7.45 (m, 1H), 7.40 (td,  $J = 7.6, 3.6$  Hz, 2H), 7.21 (dd,  $J = 7.7, 4.8$  Hz, 1H), 6.29 (dd,  $J = 19.8, 1.1$  Hz, 1H), 6.12 (dd,  $J = 40.1, 1.1$  Hz, 1H), 4.20 – 3.95 (m, 2H), 1.35 (t,  $J = 7.6$  Hz, 3H).  $^{31}\text{P}$  NMR (200 MHz,  $\text{CDCl}_3$ )  $\delta$  29.9.  $^{13}\text{C}$  NMR (125 MHz,  $\text{CDCl}_3$ )  $\delta$  149.2, 148.5 (d,  $J_{\text{CP}} = 5.6$  Hz), 140.4 (d,  $J_{\text{CP}} = 126.7$  Hz), 135.3 (d,  $J_{\text{CP}} = 3.8$  Hz), 132.5 (d,  $J_{\text{CP}} = 2.7$  Hz), 132.4 (d,  $J_{\text{CP}} = 7.5$  Hz), 131.8 (d,  $J_{\text{CP}} = 10.0$  Hz), 129.7 (d,  $J_{\text{CP}} = 135.4$  Hz), 128.6 (d,  $J_{\text{CP}} = 12.8$  Hz), 123.0, 61.4 (d,  $J_{\text{CP}} = 6.0$  Hz), 16.4 (d,  $J_{\text{CP}} = 6.4$  Hz). The enantiomeric excess was determined by Daicel Chiralcel AD (0.46 cm x 25 cm), Hexanes / IPA = 90 / 10, 1.0 mL/min,  $\lambda = 254$  nm, t (minor) = 18.9 min, t (major) = 20.0 min. HRMS (ESI-ion trap)  $m/z$ :  $[\text{M}+\text{H}]^+$  calcd for  $\text{C}_{15}\text{H}_{17}\text{NO}_2\text{P}$ , 274.0991; found 274.0990.

### Ethyl (*Z*)-(1,2-diphenylvinyl)(phenyl)phosphinate (**3qa**)

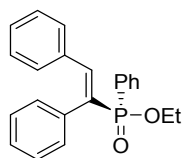

General procedure was used with diphenylacetylene (44.5 mg, 0.25 mmol, 1 equiv) and ethyl phenylphosphinate (170 mg, 1 mmol, 4 equiv) at 80 °C for 20 h to afford **3qa** as yellow oil (60.0 mg, 69% yield, 61% ee).  $[\alpha]_D^{20} = 25.3$  (c 1.0, CHCl<sub>3</sub>). <sup>1</sup>H NMR (500 MHz, CDCl<sub>3</sub>) δ 7.71 (d,  $J = 21.9$  Hz, 1H), 7.53 – 7.64 (m, 2H), 7.46 (t,  $J = 7.1$  Hz, 1H), 7.34 (td,  $J = 7.6, 3.3$  Hz, 2H), 7.29 – 7.22 (m, 3H), 7.19 – 7.14 (m, 1H), 7.07 – 7.14 (m, 2H), 7.08 – 7.01 (m, 2H), 6.98 (m, 2H), 4.22 – 4.04 (m, 2H), 1.34 (t,  $J = 7.0$  Hz, 3H). <sup>31</sup>P NMR (200 MHz, CDCl<sub>3</sub>) δ 30.7. <sup>13</sup>C NMR (125 MHz, CDCl<sub>3</sub>) δ 142.6 (d,  $J_{CP} = 10.0$  Hz), 135.5 (d,  $J_{CP} = 9.1$  Hz), 134.7 (d,  $J_{CP} = 19.0$  Hz), 134.3 (d,  $J_{CP} = 127.1$  Hz), 132.0, 131.9, 131.8 (d,  $J_{CP} = 2.6$  Hz), 130.2, 130.1 (d,  $J_{CP} = 136.6$  Hz), 129.4 (d,  $J_{CP} = 4.5$  Hz), 128.6, 128.4 (d,  $J_{CP} = 112.2$  Hz), 128.1, 127.6 (d,  $J_{CP} = 2.7$  Hz), 60.9 (d,  $J_{CP} = 6.8$  Hz), 16.4 (d,  $J_{CP} = 7.0$  Hz). The enantiomeric excess was determined by Daicel Chiralcel OD-H (0.46 cm x 25 cm), Hexanes / IPA = 98 / 2, 1.0 mL/min,  $\lambda = 254$  nm, t (major) = 12.5 min, t (minor) = 13.7 min. HRMS (ESI-ion trap)  $m/z$ :  $[M+H]^+$  calcd for C<sub>22</sub>H<sub>22</sub>O<sub>2</sub>P, 349.1352; found 349.1352.

### Ethyl phenyl(4-phenylbut-1-en-2-yl)phosphinate (**3ra**)

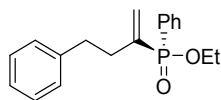

General procedure was used with 4-phenyl-1-butyne (32.5 mg, 0.25 mmol, 1 equiv) and ethyl phenylphosphinate (170 mg, 1 mmol, 4 equiv) at 60 °C for 20 h to afford **3ra** as yellow oil (45.0 mg, 60% yield, 84% ee).  $[\alpha]_D^{20} = -3.6$  (c 1.0, CHCl<sub>3</sub>). <sup>1</sup>H NMR (500 MHz, CDCl<sub>3</sub>) δ 7.82 – 7.70 (m, 2H), 7.57 – 7.51 (m, 1H), 7.47 (td,  $J = 7.5, 3.4$  Hz, 2H), 7.24 (m, 2H), 7.16 (m, 1H), 7.09 (m, 2H), 6.02 (dd,  $J = 21.1, 0.8$  Hz, 1H), 5.78 (dd,  $J = 43.5, 0.8$  Hz, 1H), 4.16 – 3.94 (m, 2H), 2.82 – 2.64 (m, 2H), 2.60 – 2.40 (m, 2H), 1.33 (t,  $J = 7.0$  Hz, 3H). <sup>31</sup>P NMR (200 MHz, CDCl<sub>3</sub>) δ 32.8. <sup>13</sup>C NMR (125 MHz, CDCl<sub>3</sub>) δ 142.2, 141.3, 141.0, 132.2 (d,  $J_{CP} = 2.8$  Hz), 131.8 (d,  $J_{CP} = 10.1$  Hz), 130.3 (d,  $J_{CP} = 131.7$  Hz), 128.7 (d,  $J_{CP} = 9.0$  Hz), 128.5 (d,  $J_{CP} = 12.7$  Hz), 128.3 (d,  $J_{CP} = 4.6$  Hz), 125.9, 60.8 (d,  $J_{CP} = 5.5$  Hz), 34.3 (d,  $J_{CP} = 5.5$  Hz), 33.1 (d,  $J_{CP} = 11.8$  Hz), 16.4 (d,  $J_{CP} = 6.3$  Hz). The enantiomeric excess was determined by Daicel Chiralcel AD-H (0.46 cm x 25 cm), Hexanes / IPA = 98 / 2, 1.0 mL/min,  $\lambda =$

250 nm, t (minor) = 24.6 min, t (major) = 26.4 min. HRMS (ESI-ion trap)  $m/z$ :  $[M+H]^+$  calcd for  $C_{18}H_{22}O_2P$ , 301.1352; found 301.1354.

### Ethyl (1-(cyclohex-1-en-1-yl)vinyl)(phenyl)phosphinate (3sa)

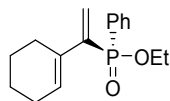

General procedure was used with 1-ethynylcyclohexene (26.5 mg, 0.25 mmol, 1 equiv) and ethyl phenylphosphinate (170 mg, 1 mmol, 4 equiv) at 60 °C for 20 h to afford **3sa** as colorless oil (38.0 mg, 55% yield, 51% ee).  $[\alpha]^{20}_D = -4.8$  (c 1.0,  $CHCl_3$ ).  $^1H$  NMR (500 MHz,  $CDCl_3$ )  $\delta$  7.81 – 7.70 (m, 2H), 7.54 – 7.47 (m, 1H), 7.47 – 7.36 (m, 2H), 6.22 (m, 1H), 5.92 (d,  $J = 8.2$  Hz, 1H), 5.87 (d,  $J = 28.7$  Hz, 1H), 4.16 – 3.95 (m, 2H), 2.12 – 2.08 (m, 2H), 2.08 – 2.01 (m, 2H), 1.67 – 1.55 (m, 2H), 1.55 – 1.45 (m, 2H), 1.33 (t,  $J = 7.1$  Hz, 3H).  $^{31}P$  NMR (200 MHz,  $CDCl_3$ )  $\delta$  31.0.  $^{13}C$  NMR (125 MHz,  $CDCl_3$ )  $\delta$  143.4 (d,  $J_{CP} = 122$  Hz), 132.9 (d,  $J_{CP} = 10.8$  Hz), 131.9 (d,  $J_{CP} = 2.7$  Hz), 131.5 (d,  $J_{CP} = 133.9$  Hz), 131.4 (d,  $J_{CP} = 10.2$  Hz), 130.4 (d,  $J_{CP} = 5.4$  Hz), 128.3 (d,  $J_{CP} = 12.7$  Hz), 126.6 (d,  $J_{CP} = 8.4$  Hz), 60.9 (d,  $J_{CP} = 5.9$  Hz), 26.9 (d,  $J_{CP} = 6.2$  Hz), 25.8, 22.6, 21.6, 16.4 (d,  $J_{CP} = 6.8$  Hz). The enantiomeric excess was determined by Daicel Chiralcel AD-H (0.46 cm x 25 cm), Hexanes / IPA = 95 / 5, 1.0 mL/min,  $\lambda = 254$  nm, t (minor) = 12.2 min, t (major) = 13.3 min. HRMS (ESI-ion trap)  $m/z$ :  $[M+H]^+$  calcd for  $C_{16}H_{22}O_2P$ , 277.1352; found 277.1352.

### Ethyl dec-1-en-5-yn-2-yl(phenyl)phosphinate (3ta)

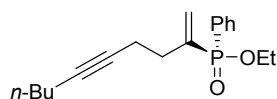

General procedure was used with 1,5-decadiyne (33.5 mg, 0.25 mmol, 1 equiv) and ethyl phenylphosphinate (170 mg, 1 mmol, 4 equiv) at 80 °C for 20 h to afford **3ta** as colorless oil (51.7 mg, 68% yield, 74% ee).  $[\alpha]^{20}_D = 0.4$  (c 1.0,  $CHCl_3$ ).  $^1H$  NMR (500 MHz,  $CDCl_3$ )  $\delta$  7.82 – 7.69 (m, 2H), 7.57 – 7.48 (m, 1H), 7.48 – 7.40 (m, 2H), 6.04 (d,  $J = 20.9$  Hz, 1H), 5.86 (dd,  $J = 43.1, 1.2$  Hz, 1H), 4.21 – 3.87 (m, 2H), 2.43 – 2.31 (m, 2H), 2.31 – 2.24 (m, 2H), 2.13 – 1.99 (m, 2H), 1.43 – 1.28 (m, 7H), 0.86 (t,  $J = 7.2$  Hz, 3H).  $^{31}P$  NMR (200 MHz,  $CDCl_3$ )  $\delta$  32.5.  $^{13}C$  NMR (125 MHz,  $CDCl_3$ )  $\delta$



140.7 (d,  $J_{\text{CP}} = 125.5$  Hz), 132.1 (d,  $J_{\text{CP}} = 2.6$  Hz), 131.7 (d,  $J_{\text{CP}} = 10.0$  Hz), 130.3 (d,  $J_{\text{CP}} = 132.2$  Hz), 129.3 (d,  $J_{\text{CP}} = 8.5$  Hz), 128.4 (d,  $J_{\text{CP}} = 12.8$  Hz), 81.2, 78.5, 60.8 (d,  $J_{\text{CP}} = 6.1$  Hz), 31.1, 31.0, 30.9, 21.8, 18.3, 17.0 (dd,  $J_{\text{CP}} = 163.0, 5.8$  Hz), 13.5. The enantiomeric excess was determined by Daicel Chiralcel OD-H (0.46 cm x 25 cm), Hexanes / IPA = 98 / 2, 1.0 mL/min,  $\lambda = 254$  nm,  $t$  (major) = 9.3,  $t$  (minor) = 10.4 min. HRMS (ESI-ion trap)  $m/z$ :  $[\text{M}+\text{H}]^+$  calcd for  $\text{C}_{18}\text{H}_{26}\text{O}_2\text{P}$ , 305.1665; found 305.1665.

### Methyl phenyl(1-phenylvinyl)phosphinate (**3ab**)

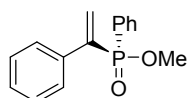

General procedure was used with phenylacetylene (25.5 mg, 0.25 mmol, 1 equiv) and methyl phenylphosphinates (156 mg, 1 mmol, 4 equiv) at 60 °C for 20 h to afford **3ab** as colorless oil (50.0 mg, 78% yield, 71% ee).  $[\alpha]_{\text{D}}^{20} = 4.7$  (c 1.0,  $\text{CHCl}_3$ ).  $^1\text{H}$  NMR (500 MHz,  $\text{CDCl}_3$ )  $\delta$  7.76 – 7.66 (m, 2H), 7.53 – 7.46 (m, 1H), 7.45 – 7.34 (m, 4H), 7.31 – 7.25 (m, 3H), 6.26 (dd,  $J = 20.1, 1.4$  Hz, 1H), 6.13 (dd,  $J = 41.0, 1.4$  Hz, 1H), 3.74 (d,  $J = 11.1$  Hz, 3H).  $^{31}\text{P}$  NMR (200 MHz,  $\text{CDCl}_3$ )  $\delta$  32.7.  $^{13}\text{C}$  NMR (125 MHz,  $\text{CDCl}_3$ )  $\delta$  142.6 (d,  $J_{\text{CP}} = 123.2$  Hz), 137.0 (d,  $J_{\text{CP}} = 11.6$  Hz), 132.3 (d,  $J_{\text{CP}} = 2.7$  Hz), 131.9 (d,  $J_{\text{CP}} = 10.1$  Hz), 131.8 (d,  $J_{\text{CP}} = 8.7$  Hz), 129.7 (d,  $J_{\text{CP}} = 135.1$  Hz), 128.4 (d,  $J_{\text{CP}} = 13.4$  Hz), 128.3, 128.1, 127.8 (d,  $J_{\text{CP}} = 4.7$  Hz), 51.5 (d,  $J_{\text{CP}} = 6.1$  Hz). The enantiomeric excess was determined by Daicel Chiralcel OD-H (0.46 cm x 25 cm), Hexanes / IPA = 98 / 2, 1.0 mL/min,  $\lambda = 254$  nm,  $t$  (major) = 13.3 min,  $t$  (minor) = 14.1 min. HRMS (ESI-ion trap)  $m/z$ :  $[\text{M}+\text{H}]^+$  calcd for  $\text{C}_{15}\text{H}_{16}\text{O}_2\text{P}$ , 259.0882; found 259.0883.

### Propyl phenyl(1-phenylvinyl)phosphinate (**3ac**)

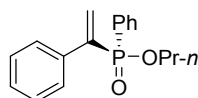

General procedure was used with phenylacetylene (25.5 mg, 0.25 mmol, 1 equiv) and propyl phenylphosphinates (184 mg, 1 mmol, 4 equiv) at 60 °C for 20 h to afford **3ac** as colorless oil (50.8 mg, 71% yield, 80% ee).  $[\alpha]_{\text{D}}^{20} = 3.8$  (c 1.0,  $\text{CHCl}_3$ ).  $^1\text{H}$  NMR (500 MHz,  $\text{CDCl}_3$ )  $\delta$  7.77 – 7.65 (m, 2H), 7.52 – 7.45 (m, 1H), 7.43 – 7.35 (m, 4H), 7.31 – 7.23 (m, 3H), 6.28 (dd,  $J = 20.0, 1.5$  Hz, 1H), 6.12 (dd,  $J = 40.7, 1.5$  Hz, 1H), 4.07 – 3.88 (m, 2H), 1.76 – 1.64 (m, 2H), 0.93 (t,  $J = 7.4$  Hz, 3H).  $^{31}\text{P}$  NMR (200

MHz, CDCl<sub>3</sub>)  $\delta$  30.6. <sup>13</sup>C NMR (125 MHz, CDCl<sub>3</sub>)  $\delta$  143.1 (d,  $J_{CP}$  = 124.9 Hz), 137.1 (d,  $J_{CP}$  = 11.7 Hz), 132.1 (d,  $J_{CP}$  = 2.7 Hz), 131.8 (d,  $J_{CP}$  = 10.0 Hz), 131.4 (d,  $J_{CP}$  = 8.3 Hz), 130.4 (d,  $J_{CP}$  = 134.9 Hz), 128.3 (d,  $J_{CP}$  = 12.8 Hz), 128.2, 128.0, 127.8 (d,  $J_{CP}$  = 5.0 Hz), 66.5 (d,  $J_{CP}$  = 6.1 Hz), 23.8 (d,  $J_{CP}$  = 6.7 Hz), 10.1. The enantiomeric excess was determined by Daicel Chiralcel OD-H (0.46 cm x 25 cm), Hexanes / IPA = 98 / 2, 1.0 mL/min,  $\lambda$  = 254 nm, t (major) = 11.5 min, t (minor) = 14.5 min. HRMS (ESI-ion trap)  $m/z$ : [M+H]<sup>+</sup> calcd for C<sub>17</sub>H<sub>20</sub>O<sub>2</sub>P, 287.1195; found 287.1195.

### Isopropyl phenyl(1-phenylvinyl)phosphinate (3ad)

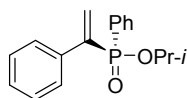

General procedure was used with phenylacetylene (25.5 mg, 0.25 mmol, 1 equiv) and isopropyl phenylphosphinates (184 mg, 1 mmol, 4 equiv) at 60 °C for 20 h to afford **3ad** as colorless oil (22.9 mg, 32% yield, 73% ee). [ $\alpha$ ]<sub>D</sub><sup>20</sup> = 4.0 (c 1.0, CHCl<sub>3</sub>). <sup>1</sup>H NMR (500 MHz, CDCl<sub>3</sub>)  $\delta$  7.76 – 7.69 (m, 2H), 7.51 – 7.45 (m, 1H), 7.43 – 7.35 (m, 4H), 7.31 – 7.17 (m, 3H), 6.24 (dd,  $J$  = 20.0, 1.5 Hz, 1H), 6.10 (dd,  $J$  = 40.7, 1.5 Hz, 1H), 4.78 – 4.57 (m, 1H), 1.32 (d,  $J$  = 6.2 Hz, 3H), 1.27 (d,  $J$  = 6.2 Hz, 3H). <sup>31</sup>P NMR (200 MHz, CDCl<sub>3</sub>)  $\delta$  29.4. <sup>13</sup>C NMR (125 MHz, CDCl<sub>3</sub>)  $\delta$  143.7 (d,  $J_{CP}$  = 124.7 Hz), 137.2 (d,  $J_{CP}$  = 11.9 Hz), 132.0 (d,  $J_{CP}$  = 2.6 Hz), 131.8 (d,  $J_{CP}$  = 10.3 Hz), 131.0 (d,  $J_{CP}$  = 8.2 Hz), 130.8, 128.2, 128.1 (d,  $J_{CP}$  = 40.8 Hz), 127.9, 127.8, 70.4 (d,  $J_{CP}$  = 6.2 Hz), 24.2 (q,  $J_{CP}$  = 2.0 Hz). The enantiomeric excess was determined by Daicel Chiralcel OD-H (0.46 cm x 25 cm), Hexanes / IPA = 98 / 2, 1.0 mL/min,  $\lambda$  = 254 nm, t (major) = 15.8 min, t (minor) = 22.7 min. HRMS (ESI-ion trap)  $m/z$ : [M+H]<sup>+</sup> calcd for C<sub>17</sub>H<sub>20</sub>O<sub>2</sub>P, 287.1195; found 287.1194.

### Ethyl (1-phenylvinyl)(*p*-tolyl)phosphinate (3ae)

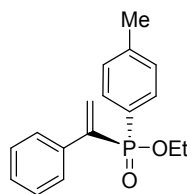

General procedure was used with phenylacetylene (25.5 mg, 0.25 mmol, 1 equiv) and ethyl *p*-tolylphosphinate (184 mg, 1 mmol, 4 equiv) at 80 °C for 20 h to afford **3ae** as colorless oil (33.6 mg, 43% yield, 37% ee). [ $\alpha$ ]<sub>D</sub><sup>20</sup> = 1.0 (c 1.0, CHCl<sub>3</sub>). <sup>1</sup>H NMR (500 MHz, CDCl<sub>3</sub>)  $\delta$  7.64 – 7.56 (m, 2H), 7.43–7.37 (m, 2H), 7.30 – 7.25 (m, 3H), 7.24 – 7.18 (m, 2H), 6.24 (dd,  $J$  = 20.0, 1.6 Hz, 1H), 6.1 (dd,  $J$

= 40.0, 1.6 Hz, 1H), 4.16 – 4.10 (m, 2H), 2.36 (s, 3H), 1.31 (t,  $J = 7.1$  Hz, 3H).  $^{31}\text{P}$  NMR (200 MHz,  $\text{CDCl}_3$ )  $\delta$  31.2.  $^{13}\text{C}$  NMR (125 MHz,  $\text{CDCl}_3$ )  $\delta$  143.3 (d,  $J_{\text{CP}} = 125.0$  Hz), 142.7 (d,  $J_{\text{CP}} = 2.8$  Hz), 137.2 (d,  $J_{\text{CP}} = 11.8$  Hz), 131.8 (d,  $J_{\text{CP}} = 10.0$  Hz), 131.1 (d,  $J_{\text{CP}} = 8.2$  Hz), 129.1 (d,  $J_{\text{CP}} = 13.5$  Hz), 128.2, 128.0, 127.9, 127.8, 61.0 (d,  $J_{\text{CP}} = 6.0$  Hz), 21.6, 16.4 (d,  $J_{\text{CP}} = 6.5$  Hz). The enantiomeric excess was determined by Daicel Chiralcel OD-H (0.46 cm x 25 cm), Hexanes / IPA = 98 / 2, 1.0 mL/min,  $\lambda = 254$  nm,  $t$  (major) = 13.7 min,  $t$  (minor) = 17.4 min. HRMS (ESI-ion trap)  $m/z$ :  $[\text{M}+\text{H}]^+$  calcd for  $\text{C}_{17}\text{H}_{20}\text{OP}$ , 287.1195; found 287.1194.

### Methyl (1-(4-(*tert*-butyl)phenyl)vinyl)(phenyl)phosphinate (**3fb**)

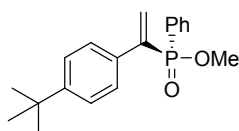

General procedure was used with 4-(*tert*-butyl)phenylacetylene (39.5 mg, 0.25 mmol, 1 equiv) and methyl phenylphosphinates (156 mg, 1 mmol, 4 equiv) at 60 °C for 20 h to afford **3fb** as colorless oil (40.0 mg, 51% yield, 71% ee).  $[\alpha]^{20}_{\text{D}} = 2.9$  (c 1.0,  $\text{CHCl}_3$ ).  $^1\text{H}$  NMR (500 MHz,  $\text{CDCl}_3$ )  $\delta$  7.78 – 7.70 (m, 2H), 7.55 – 7.46 (m, 1H), 7.45 – 7.38 (m, 2H), 7.36 – 7.27 (m, 4H), 6.22 (d,  $J = 1.2$  Hz, 0.5H), 6.18 (d,  $J = 1.0$  Hz, 1H), 6.10 (d,  $J = 1.3$  Hz, 0.5H), 3.74 (d,  $J = 11.1$ , 3H), 1.28 (s, 9H).  $^{31}\text{P}$  NMR (200 MHz,  $\text{CDCl}_3$ )  $\delta$  33.2.  $^{13}\text{C}$  NMR (125 MHz,  $\text{CDCl}_3$ )  $\delta$  151.2, 142.2 (d,  $J_{\text{CP}} = 123.8$  Hz), 133.9 (d,  $J_{\text{CP}} = 12.0$  Hz), 132.2 (d,  $J_{\text{CP}} = 2.8$  Hz), 131.8 (d,  $J_{\text{CP}} = 10.0$  Hz), 131.2 (d,  $J_{\text{CP}} = 8.6$  Hz), 130.0 (d,  $J_{\text{CP}} = 135.2$  Hz), 128.4 (d,  $J_{\text{CP}} = 13.0$  Hz), 127.4 (d,  $J_{\text{CP}} = 5.2$  Hz), 125.3, 51.5 (d,  $J_{\text{CP}} = 6.3$  Hz), 34.5, 31.2. The enantiomeric excess was determined by Daicel Chiralcel OD-H (0.46 cm x 25 cm), Hexanes / IPA = 98 / 2, 1.0 mL/min,  $\lambda = 254$  nm,  $t$  (major) = 13.3 min,  $t$  (minor) = 14.1 min. HRMS (ESI-ion trap)  $m/z$ :  $[\text{M}+\text{H}]^+$  calcd for  $\text{C}_{19}\text{H}_{24}\text{O}_2\text{P}$ , 315.1508; found 315.1509.

### Methyl(phenyl)(1-phenylvinyl)phosphine oxide (**3af**)

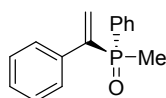

General procedure was used with phenylacetylene (25.5 mg, 0.25 mmol, 1 equiv) and methyl(phenyl)phosphine oxide (140 mg, 1 mmol, 4 equiv) at 60 °C for 20 h to afford **3af** as colorless oil (17.0 mg, 28% yield, 54% ee).  $[\alpha]^{20}_{\text{D}} = -4.1$  (c 1.0,  $\text{CHCl}_3$ ).  $^1\text{H}$  NMR (500 MHz,  $\text{CDCl}_3$ )  $\delta$  7.76 –

7.64 (m, 2H), 7.57 – 7.50 (m, 1H), 7.43-7.50 (m, 2H), 7.32 – 7.24 (m, 5H), 6.12 (dt,  $J = 8.3, 1.1$  Hz, 1H), 6.07 (dd,  $J = 26.9, 1.1$  Hz, 1H), 1.81 (d,  $J = 13.1$  Hz, 3H).  $^{31}\text{P}$  NMR (200 MHz,  $\text{CDCl}_3$ )  $\delta$  30.7.  $^{13}\text{C}$  NMR (125 MHz,  $\text{CDCl}_3$ )  $\delta$  145.8 (d,  $J_{\text{CP}} = 89.1$  Hz), 137.5 (d,  $J_{\text{CP}} = 11.0$  Hz), 132.7 (d,  $J_{\text{CP}} = 100.8$  Hz), 131.8 (d,  $J_{\text{CP}} = 2.7$  Hz), 130.7 (d,  $J_{\text{CP}} = 9.4$  Hz), 129.6 (d,  $J_{\text{CP}} = 8.2$  Hz), 128.5 (d,  $J_{\text{CP}} = 11.6$  Hz), 128.4, 128.1, 127.8 (d,  $J_{\text{CP}} = 4.5$  Hz), 15.2 (d,  $J_{\text{CP}} = 74.4$  Hz). The enantiomeric excess was determined by Daicel Chiralcel OD-H (0.46 cm x 25 cm), Hexanes / IPA = 95 / 5, 1.0 mL/min,  $\lambda = 254$  nm,  $t$  (major) = 23.4 min,  $t$  (minor) = 25.8 min. HRMS (ESI-ion trap)  $m/z$ :  $[\text{M}+\text{H}]^+$  calcd for  $\text{C}_{15}\text{H}_{16}\text{OP}$ , 243.0933; found 243.0933.

#### Ethyl (1-([1,1'-biphenyl]-4-yl)vinyl)(phenyl)phosphinate (4)

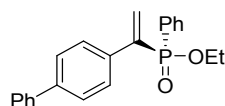

White solid (34.1 mg, 98% yield, 77% ee). Mp 86-87°C.  $[\alpha]_{\text{D}}^{20} = -4.8$  (c 1.0,  $\text{CHCl}_3$ ).  $^1\text{H}$  NMR (500 MHz,  $\text{CDCl}_3$ )  $\delta$  7.81 – 7.71 (m, 2H), 7.59 – 7.55 (m, 2H), 7.54 – 7.47 (m, 5H), 7.46 – 7.39 (m, 4H), 7.37 – 7.31 (m, 1H), 6.28 (d,  $J = 19.9$  Hz, 1H), 6.19 (d,  $J = 40.7$  Hz, 1H), 4.22 – 4.03 (m, 2H), 1.37 (t,  $J = 7.1$  Hz, 3H).  $^{31}\text{P}$  NMR (200 MHz,  $\text{CDCl}_3$ )  $\delta$  30.9.  $^{13}\text{C}$  NMR (125 MHz,  $\text{CDCl}_3$ )  $\delta$  142.6 (d,  $J = 125.2$  Hz), 140.8, 140.4, 136.0 (d,  $J = 11.8$  Hz), 132.2 (d,  $J = 2.8$  Hz), 131.8 (d,  $J = 10.1$  Hz), 131.2 (d,  $J = 7.8$  Hz), 130.5 (d,  $J = 134.8$  Hz), 128.8, 128.4 (d,  $J = 12.8$  Hz), 128.3, 128.2, 127.4, 127.0, 61.2 (d,  $J = 5.9$  Hz), 16.4 (d,  $J = 6.5$  Hz). The enantiomeric excess was determined by Daicel Chiralcel OD-H (0.46 cm x 25 cm), Hexanes / IPA = 98 / 2, 1.0 mL/min,  $\lambda = 254$  nm,  $t$  (minor) = 16.4min,  $t$  (major) = 17.8 min. HRMS (ESI-ion trap)  $m/z$ :  $[\text{M}+\text{H}]^+$  calcd for  $\text{C}_{22}\text{H}_{22}\text{O}_2\text{P}$ , 349.1352; found 349.1347.

#### Ethyl (1-(4-(benzo[d][1,3]dioxol-5-yl)phenyl)vinyl)(phenyl)phosphinate (5)

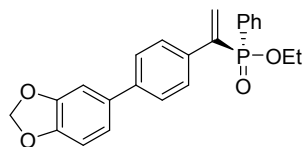

Yellow oil (30.0 mg, 77% yield, 77% ee).  $[\alpha]_{\text{D}}^{20} = 11.0$  (c 1.0,  $\text{CHCl}_3$ ).  $^1\text{H}$  NMR (400 MHz,  $\text{CDCl}_3$ )  $\delta$  7.82 – 7.68 (m, 2H), 7.51 – 7.38 (m, 7H), 7.07 – 6.99 (m, 2H), 6.89 – 6.81 (m, 1H), 6.26 (d,  $J = 20.0$  Hz, 1H), 6.16 (d,  $J = 40.0$  Hz, 1H), 5.97 (s, 2H), 4.23 – 3.97 (m, 2H), 1.34 (t,  $J = 7.0$  Hz, 3H).  $^{31}\text{P}$  NMR (160 MHz,  $\text{CDCl}_3$ )  $\delta$  30.9.  $^{13}\text{C}$  NMR (100 MHz,  $\text{CDCl}_3$ )  $\delta$  147.6 (d,  $J = 93.4$  Hz), 142.5 (d,  $J = 124.4$

Hz), 140.5, 135.6 (d,  $J = 11.8$  Hz), 134.7, 132.2 (d,  $J = 2.7$  Hz), 131.8 (d,  $J = 10.1$  Hz), 131.1 (d,  $J = 8.4$  Hz), 130.4 (d,  $J = 135.4$  Hz), 128.4, 128.3, 128.2 (d,  $J = 5.1$ ), 126.6, 120.5, 108.5, 107.4, 101.1, 61.2 (d,  $J = 6.0$  Hz), 16.4 (d,  $J = 6.5$  Hz). The enantiomeric excess was determined by Daicel Chiralcel AD-H (0.46 cm x 25 cm), Hexanes / IPA = 75 / 25, 1.0 mL/min,  $\lambda = 254$  nm,  $t$  (minor) = 10.9 min,  $t$  (major) = 14.1 min. HRMS (ESI-ion trap)  $m/z$ :  $[M+H]^+$  calcd for  $C_{23}H_{22}O_4P$ , 393.1250; found 393.1245.

### Ethyl (*S*)-(2-(diphenylphosphaneyl)-1-phenylethyl)(phenyl)phosphinate (6)

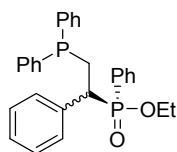

Colorless oil (42.0 mg, 92% yield, dr 3:2, major 79% ee, minor 79% ee).  $^1H$  NMR (500 MHz,  $CDCl_3$ )  $\delta$  7.56 – 7.48 (m, 1.24H), 7.48 – 7.42 (m, 1.25H), 7.41 – 7.34 (m, 5H), 7.30 – 7.14 (m, 10.0H), 7.13 – 7.08 (m, 1.82H), 7.03 – 6.94 (m, 1.19H), 4.22 – 4.05 (m, 0.64H), 3.95 – 3.83 (m, 0.62H), 3.83 – 3.68 (m, 0.81H), 3.15 – 2.89 (m, 1.64H), 2.75 – 2.55 (m, 1.41H), 1.30 (t,  $J = 7.0$  Hz, 1.88H), 1.07 (t,  $J = 7.0$  Hz, 1.2H).  $^{31}P$  NMR (200 MHz,  $CDCl_3$ )  $\delta$  43.1, 42.9, 41.6, 41.4, -20.2, -20.3, -20.7, -20.9.  $^{13}C$  NMR (125 MHz,  $CDCl_3$ )  $\delta$  139.0 (d,  $J = 13.7$  Hz), 136.8 (d,  $J = 15.0$  Hz), 136.3 (d,  $J = 15.3$  Hz), 135.2 (dd,  $J = 7.2, 3.1$  Hz), 134.85 (t,  $J = 3.5$  Hz), 133.8, 133.6, 133.4, 132.3 – 131.9 (m), 131.7 (d,  $J = 18.0$  Hz), 130.1, 129.7 (d,  $J = 5.9$  Hz), 129.6 (d,  $J = 6.0$  Hz), 129.2, 129.1, 128.5 (d,  $J = 7.1$  Hz), 128.42 – 127.87 (m), 127.3 (d,  $J = 2.8$  Hz), 127.1 (d,  $J = 3.2$  Hz), 61.1 (t,  $J = 7.3$  Hz), 44.8 (d,  $J = 15.0$  Hz), 44.5 (d,  $J = 14.5$  Hz), 44.1 (d,  $J = 15.0$  Hz), 43.8 (d,  $J = 14.5$  Hz), 27.9 (d,  $J = 15.6$  Hz), 27.5 (dd,  $J = 15.6, 3.4$  Hz), 16.4 (d,  $J = 6.4$  Hz), 16.2 (d,  $J = 6.2$  Hz). The enantiomeric excess was determined by Daicel Chiralcel IA (0.46 cm x 25 cm), Hexanes / IPA = 98 / 2, 1.0 mL/min,  $\lambda = 210$  nm,  $t_1$  (major) = 22.1 min,  $t_1$  (minor) = 24.5 min,  $t_2$  (major) = 27.6 min,  $t_2$  (minor) = 29.6 min. HRMS (ESI-ion trap)  $m/z$ :  $[M+H]^+$  calcd for  $C_{28}H_{29}O_2P_2$ , 459.1637; found 459.1630.

## 7. NMR spectrum

### Ethyl phenyl(1-phenylvinyl)phosphinate (3aa)

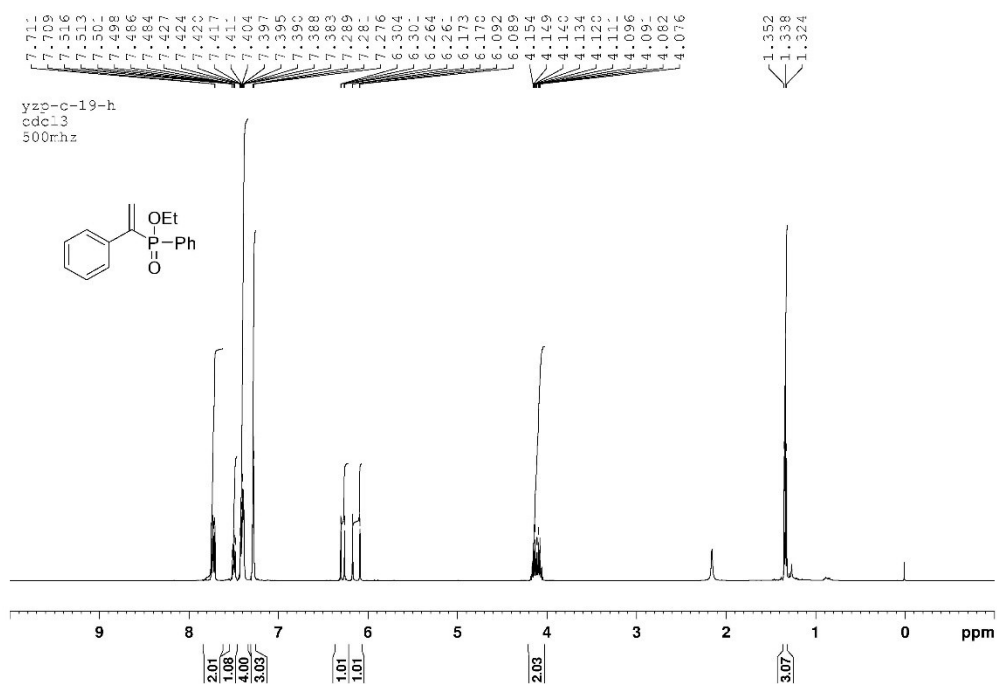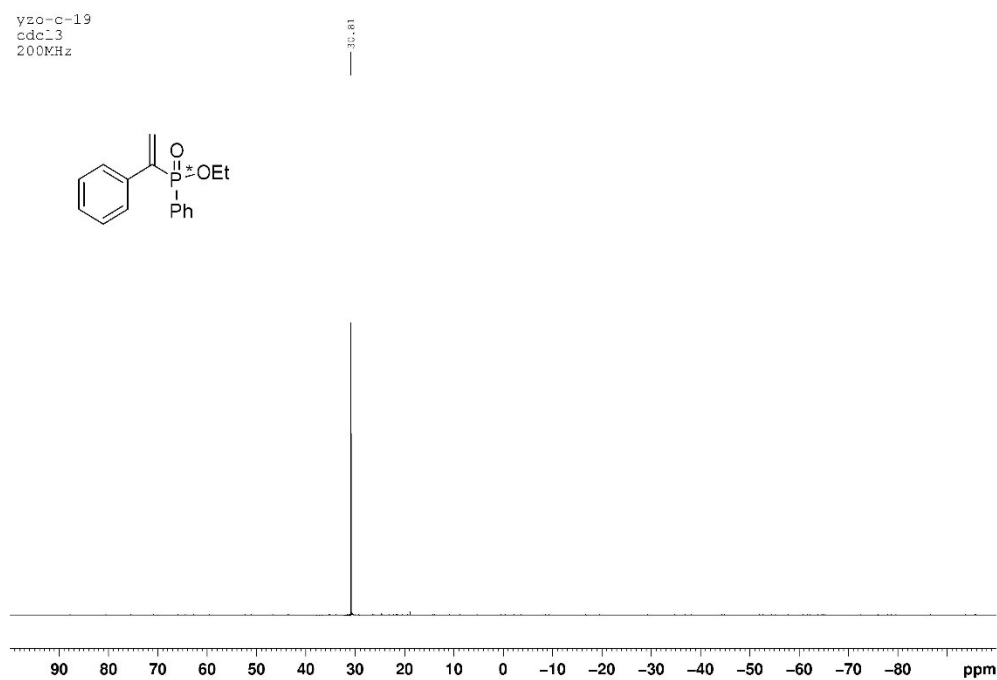



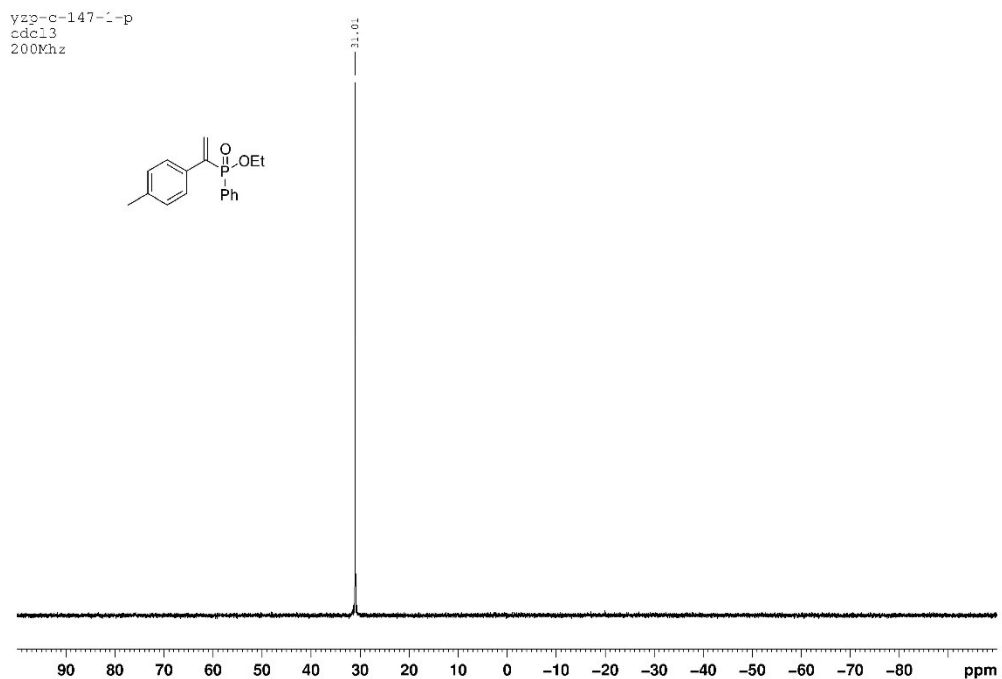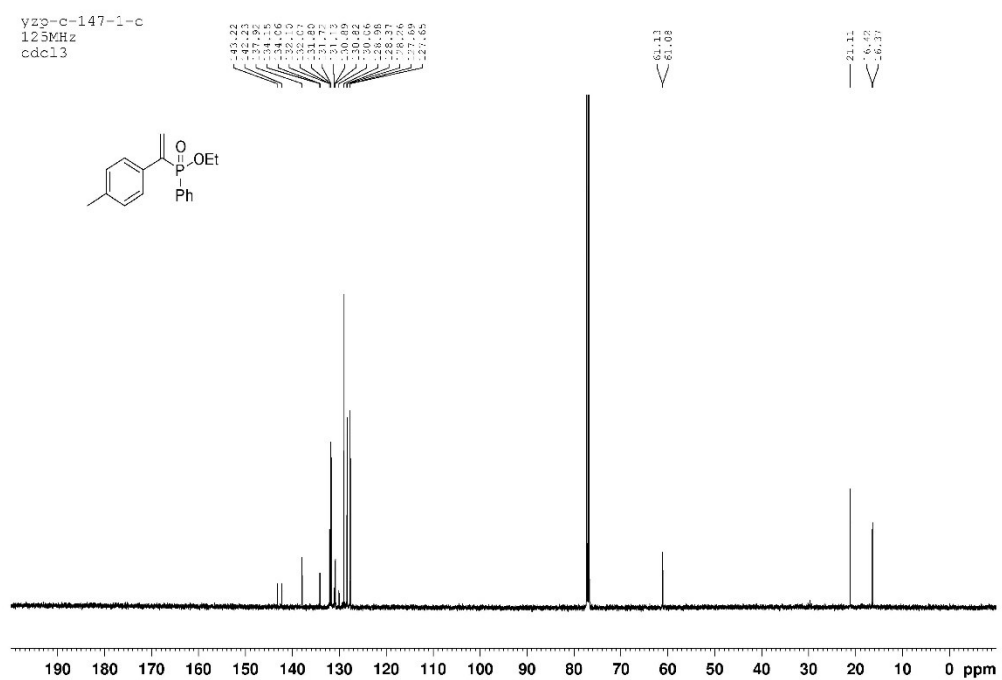

**Ethyl phenyl(1-(*m*-tolyl)vinyl) phosphinate (3ca)**



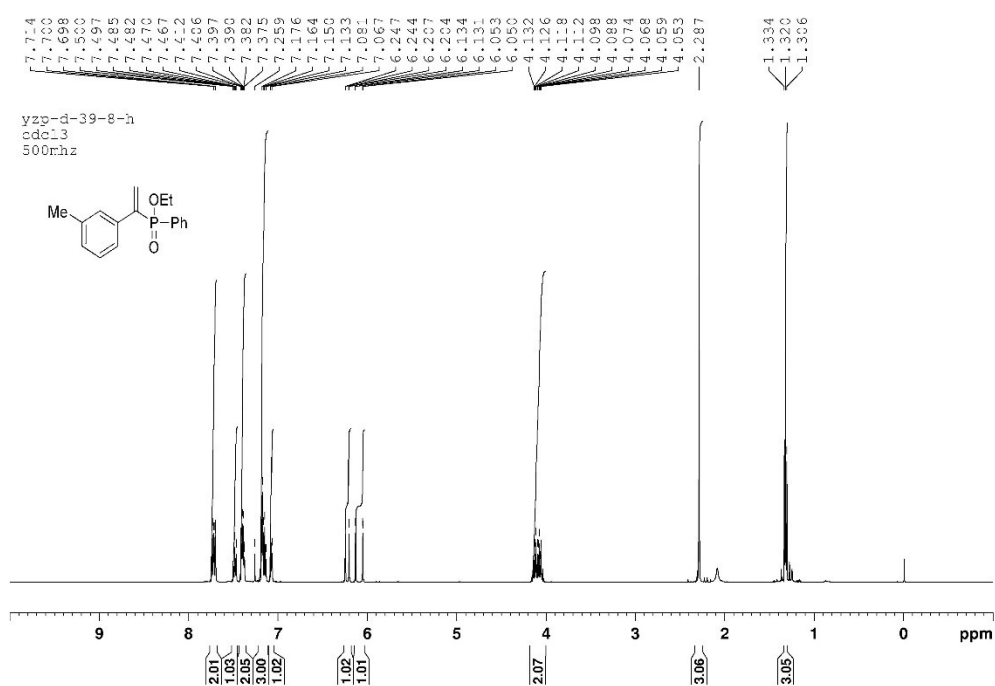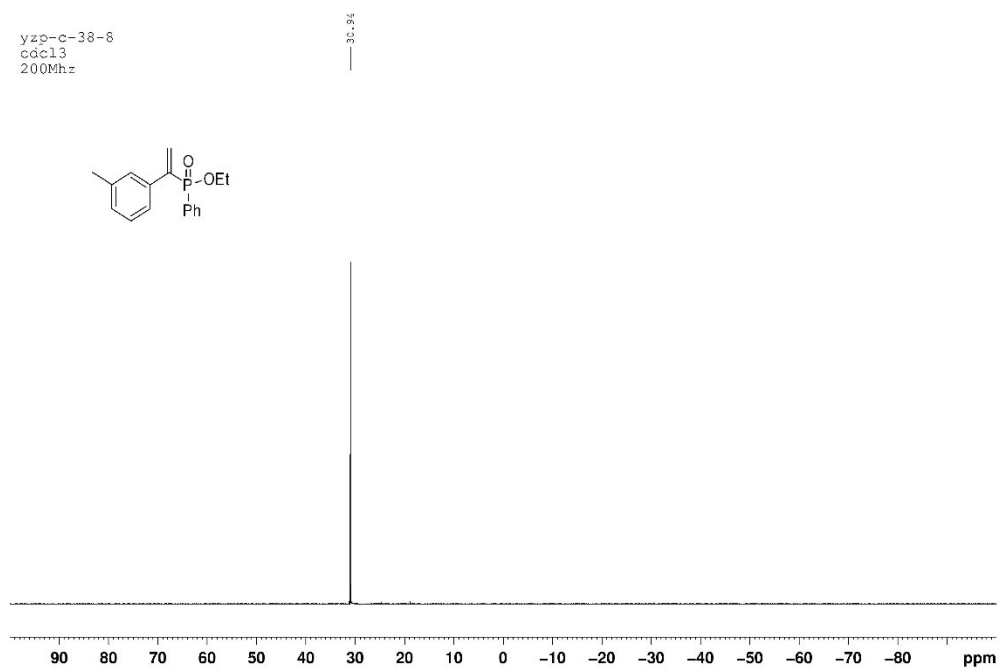



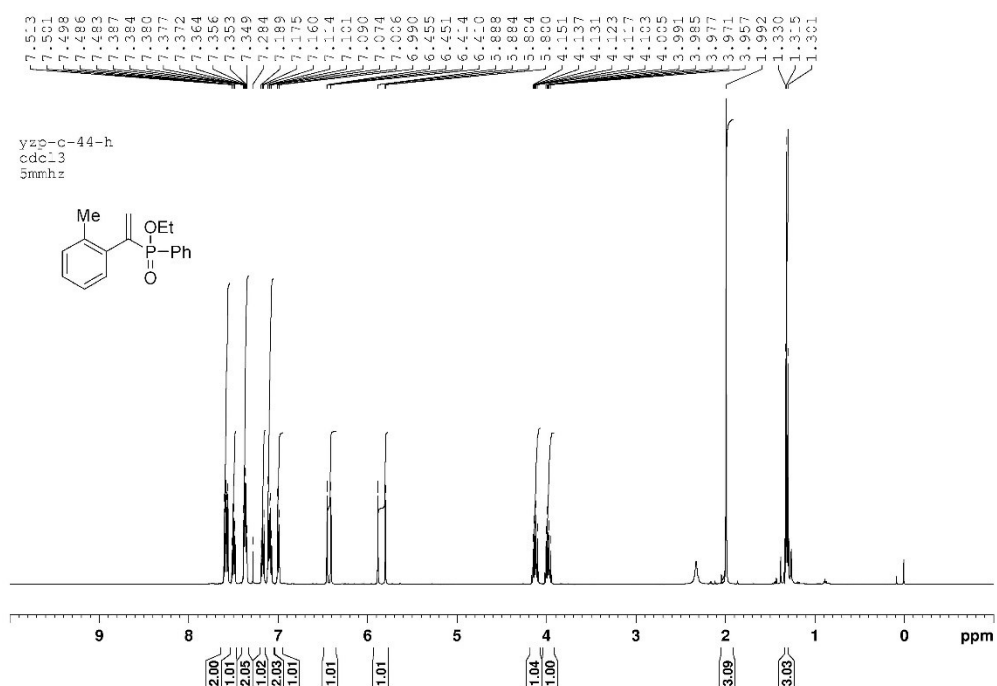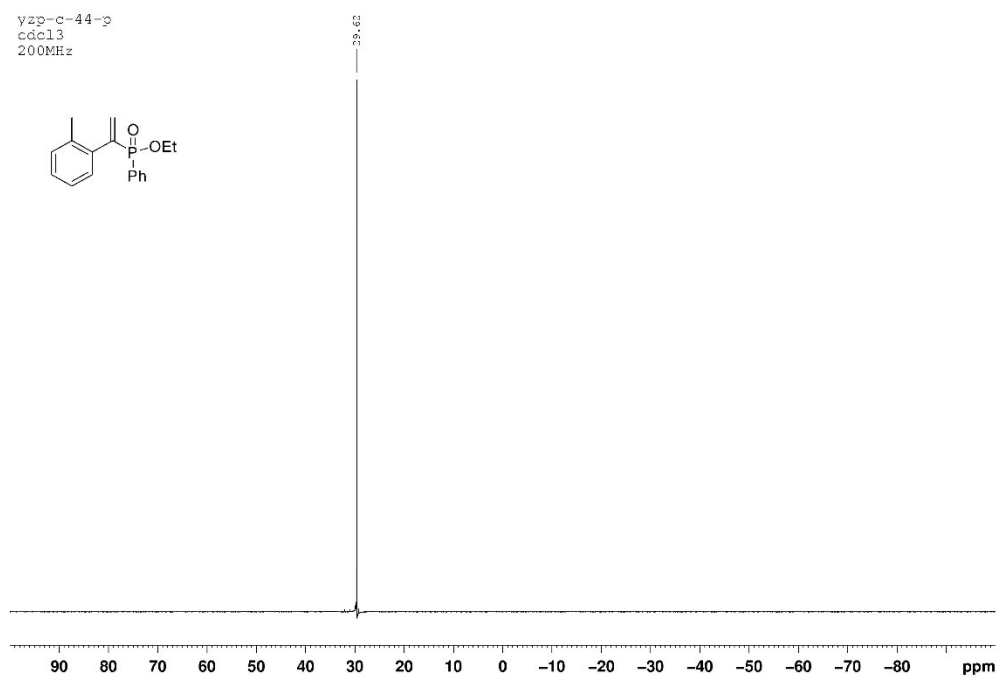

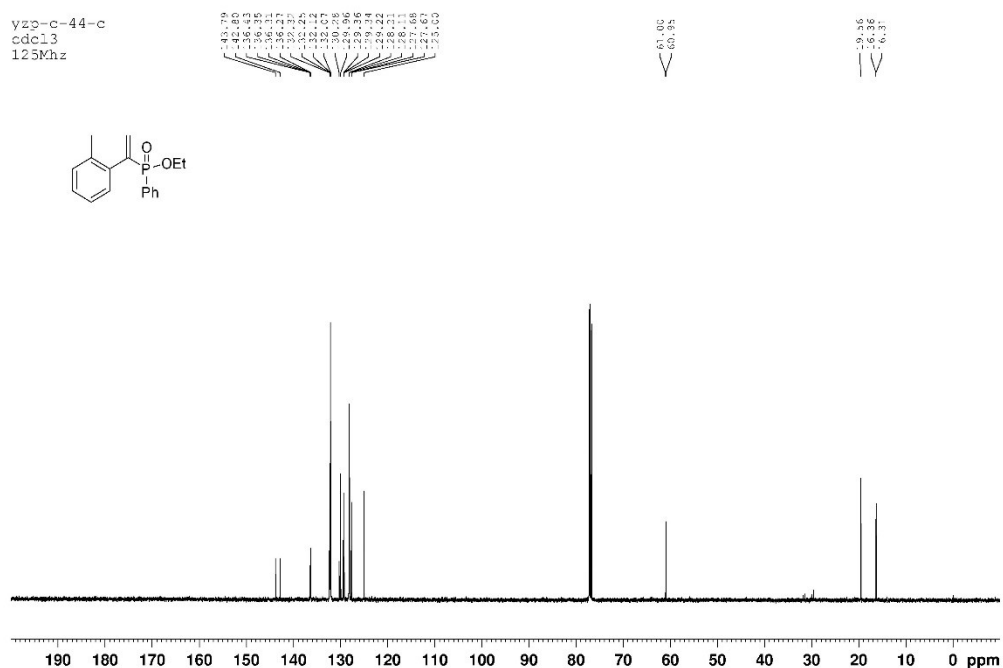

### Ethyl (1-(4-ethylphenyl)vinyl)(phenyl)phosphinate (3ea)

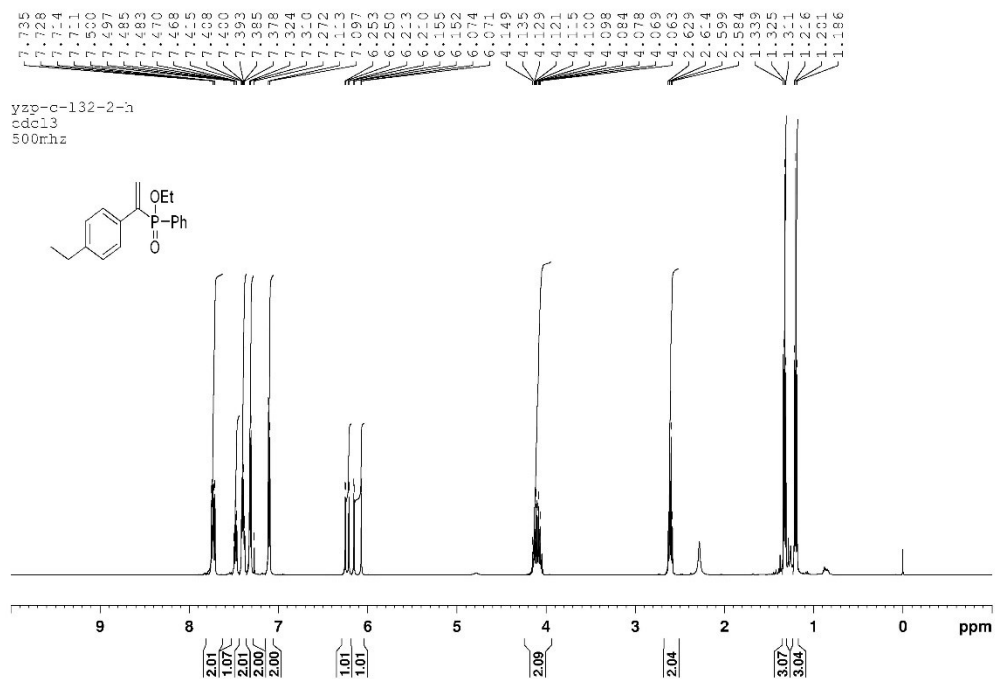

yzp-c-132-2-p  
cdcl3  
200MHz

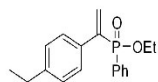

3.13

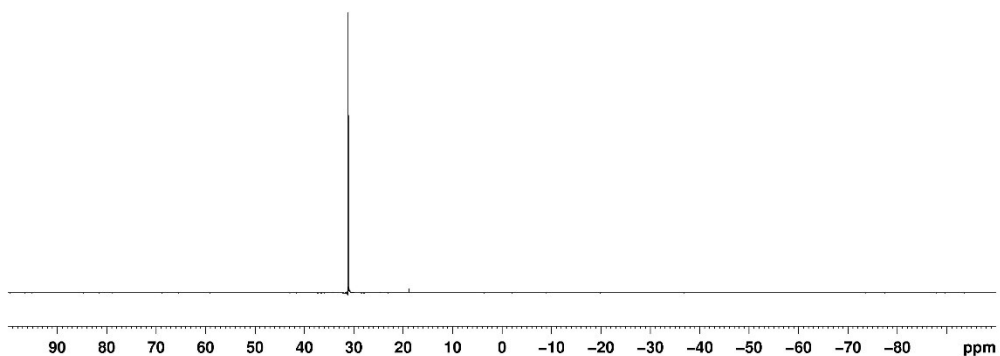

yzp-132-2-c  
cdcl3  
125MHz

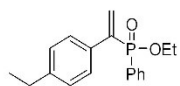

144.18  
143.16  
142.17  
141.18  
139.19  
138.20  
137.21  
136.22  
135.23  
134.24  
133.25  
132.26  
131.27  
130.28  
129.29  
128.30  
127.31  
126.32  
125.33

6.10  
6.05

28.40

16.97  
16.32  
15.67

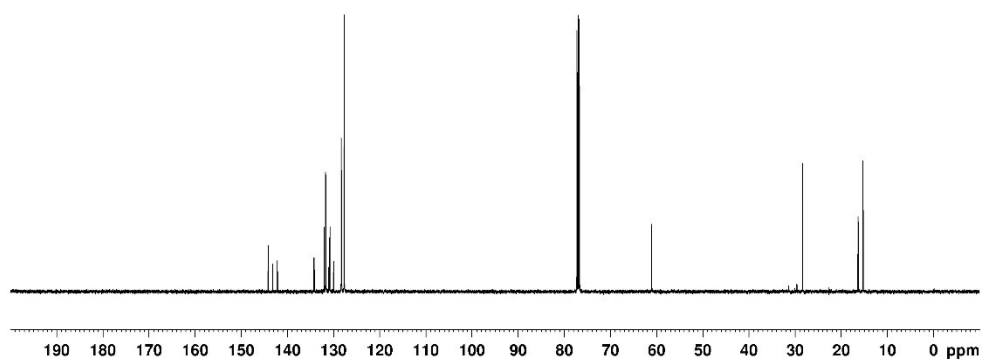

# Ethyl (1-(4-(*tert*-butyl)phenyl)vinyl)(phenyl)phosphinate (3fa)

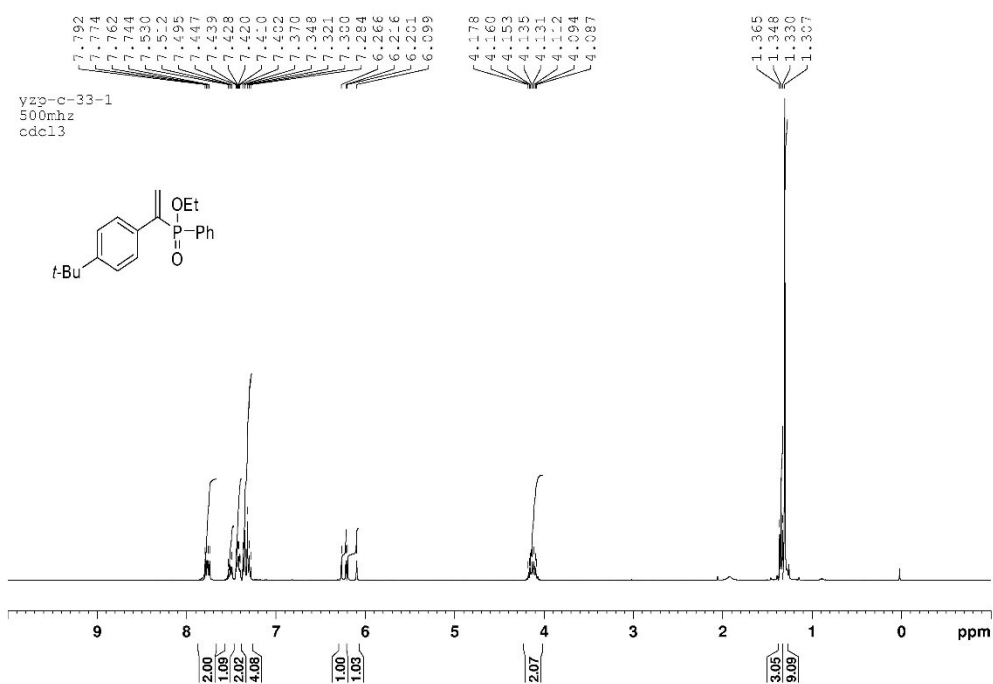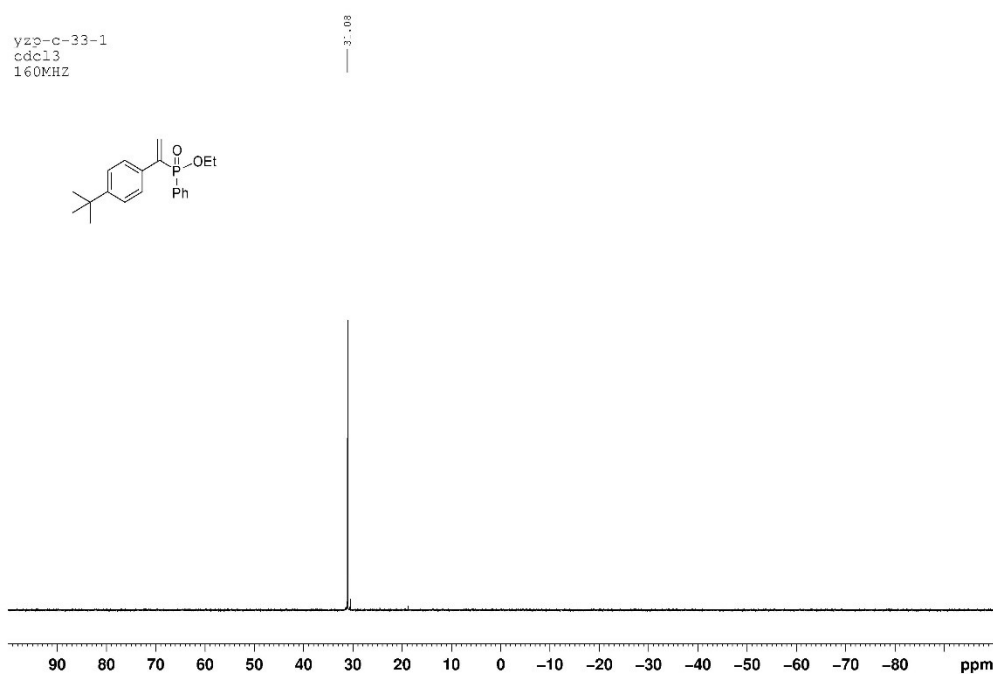

yzp-c-33-1

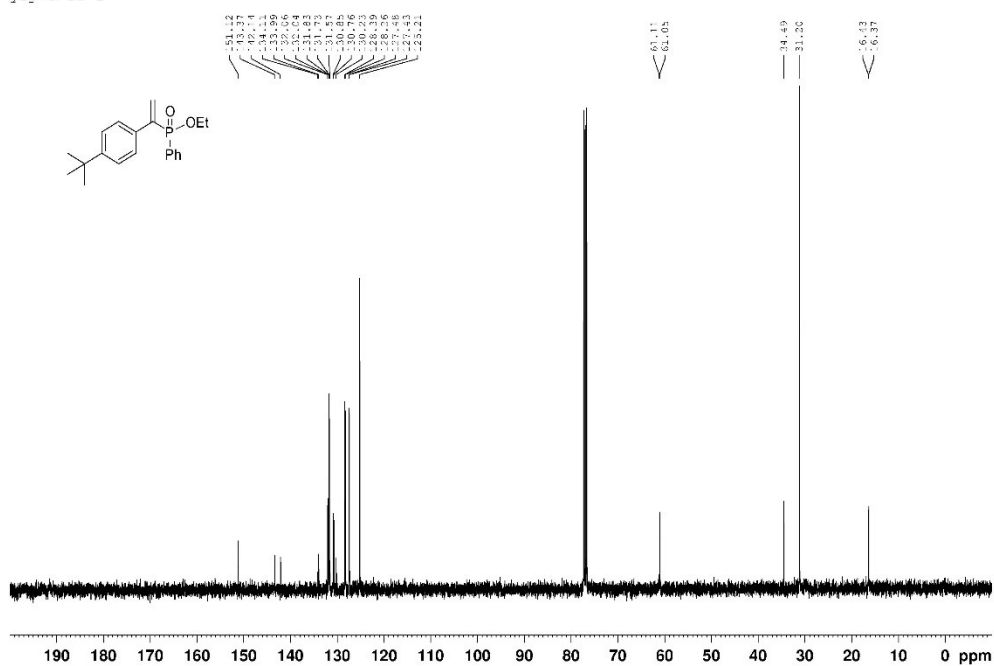

## Ethyl (1-(4-pentylphenyl)vinyl)(phenyl)phosphinate (3ga)

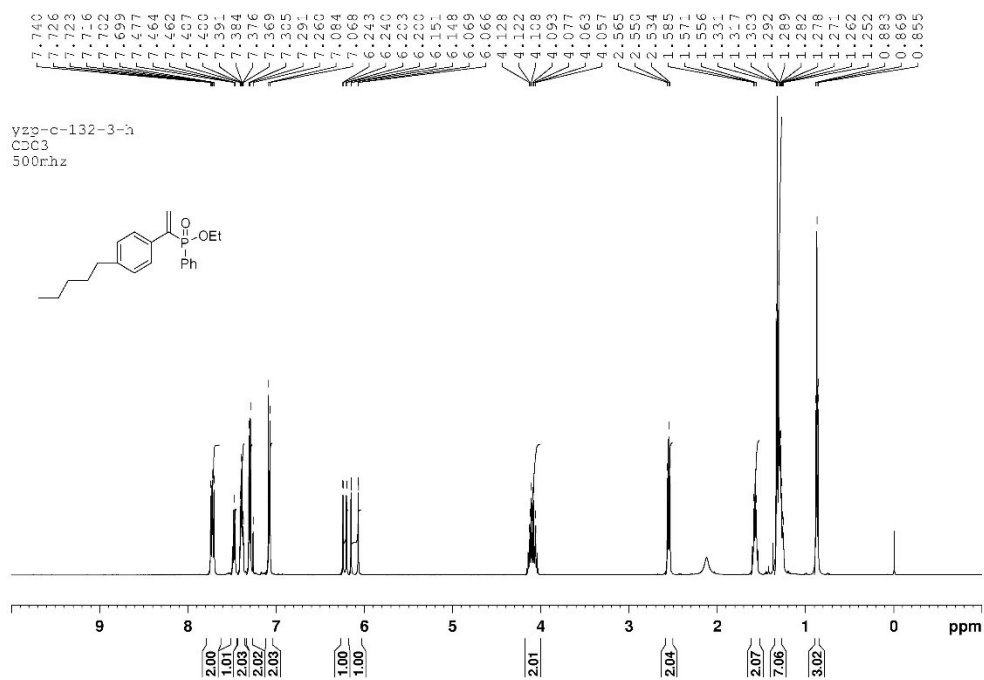

yzp-c-132-3-p  
cdcl3  
200MHz

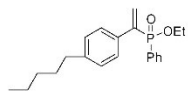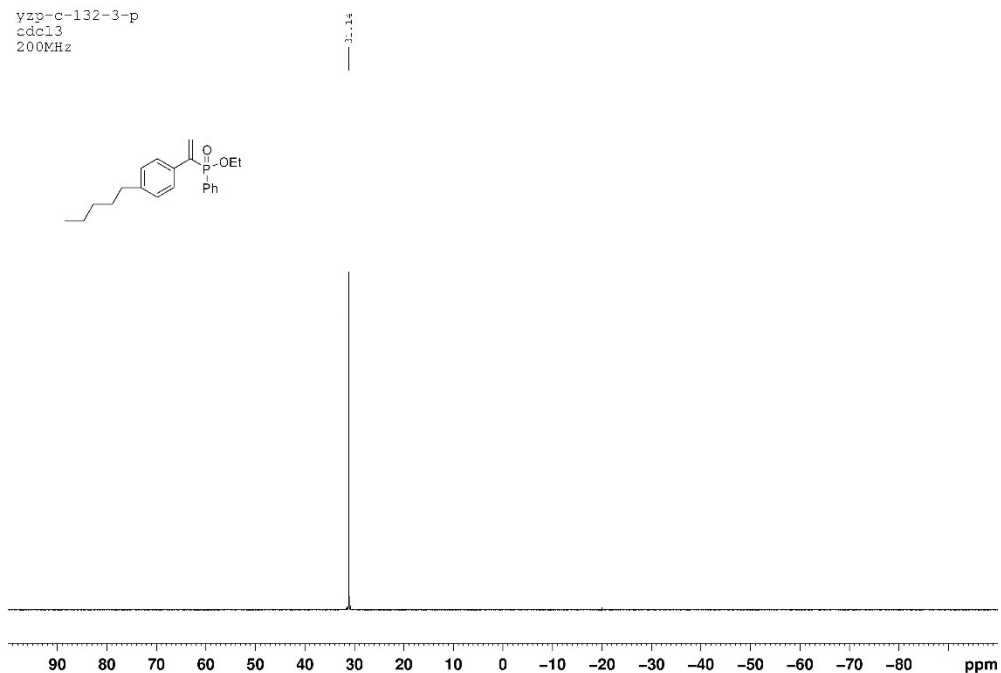

yzp-c-132-3-c  
cdcl3  
125MHz

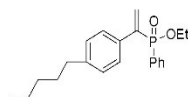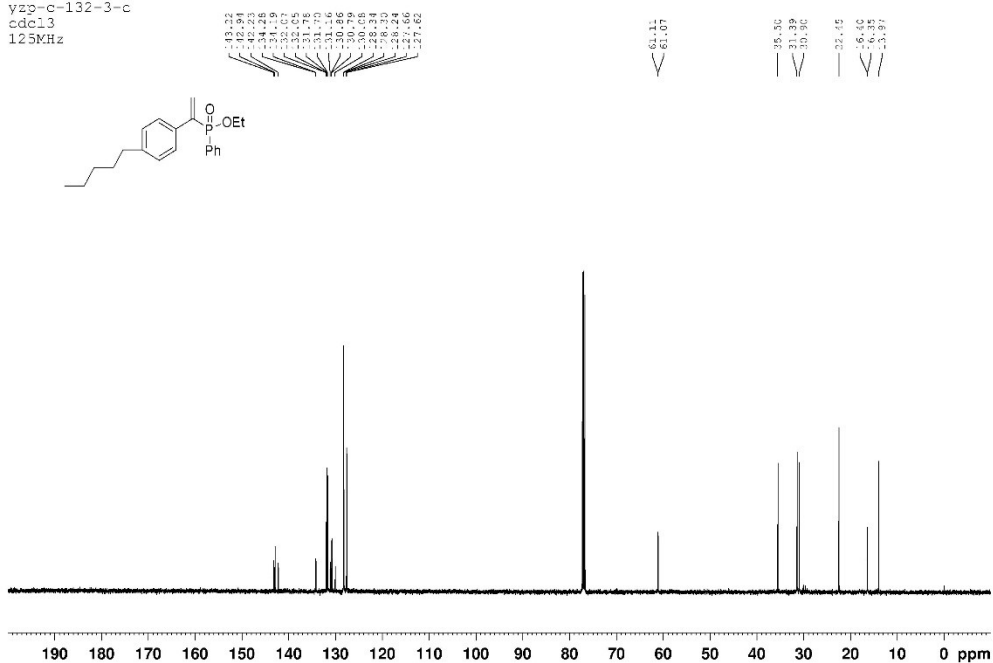



# **Ethyl (1-(4-fluorophenyl)vinyl)(phenyl)phosphinate (3ha)**

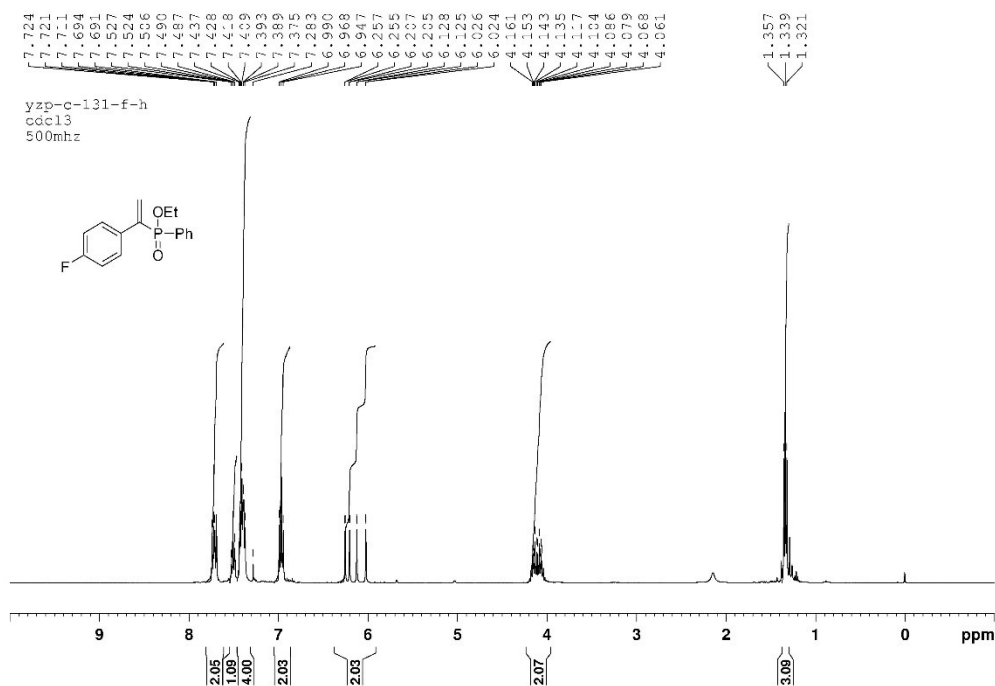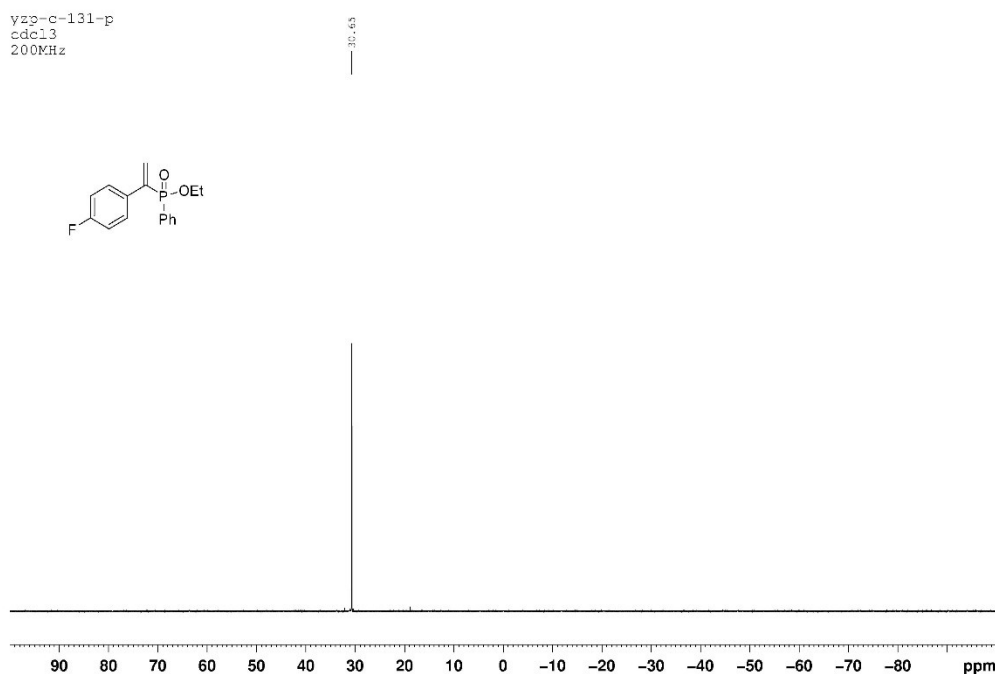

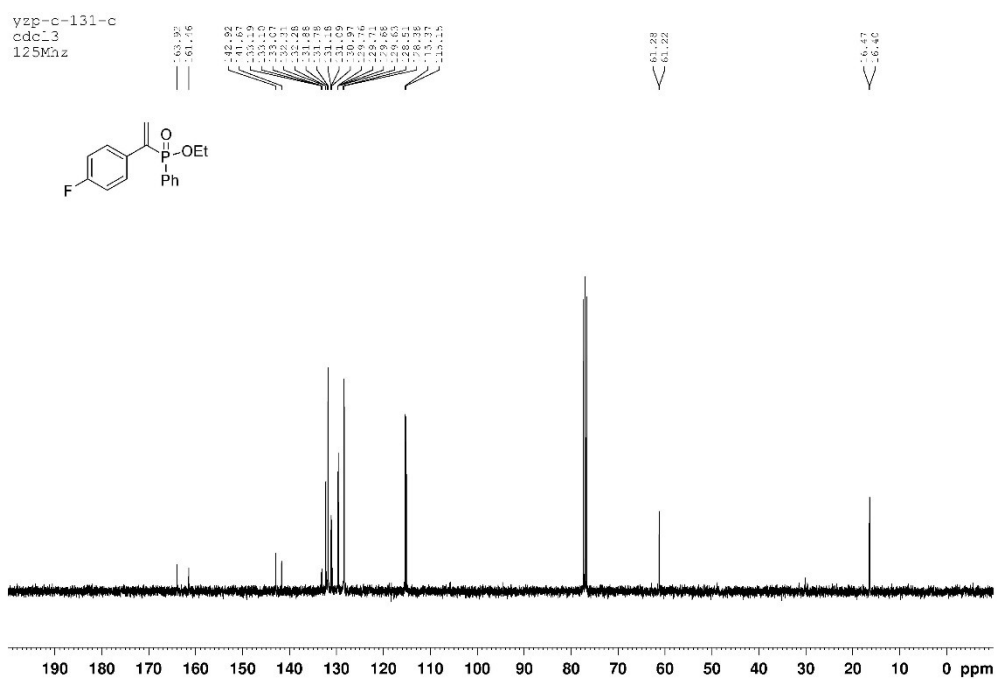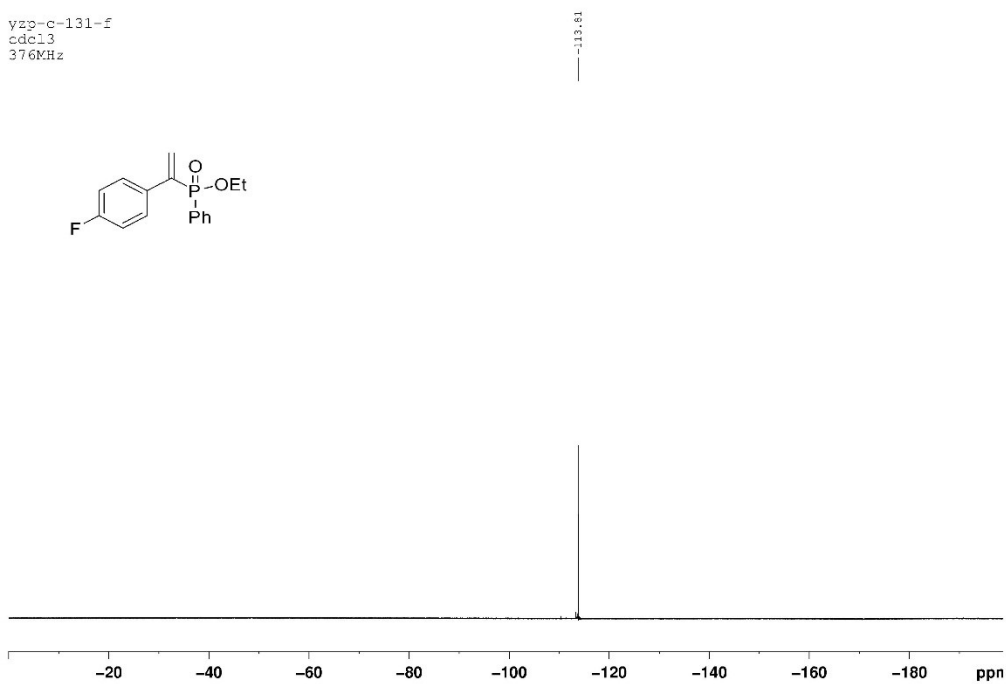

# **Ethyl (1-(4-chlorophenyl)vinyl)(phenyl)phosphinate (3ia)**

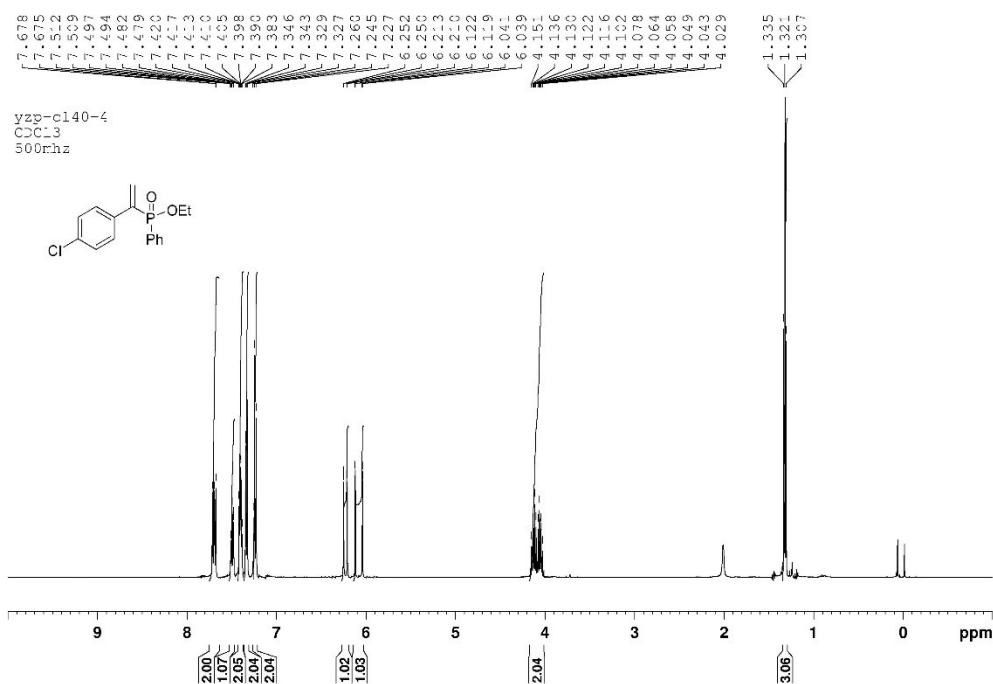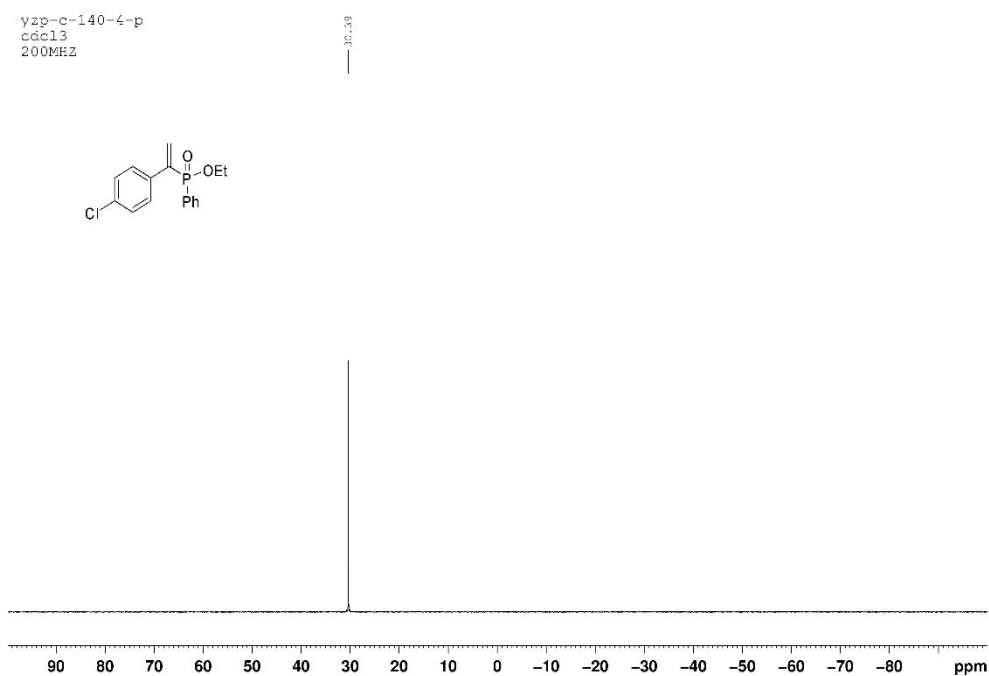

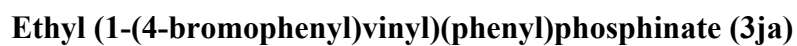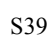

yzp-c-135-2-br-p  
200Mhz  
cdc13

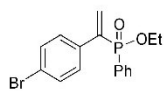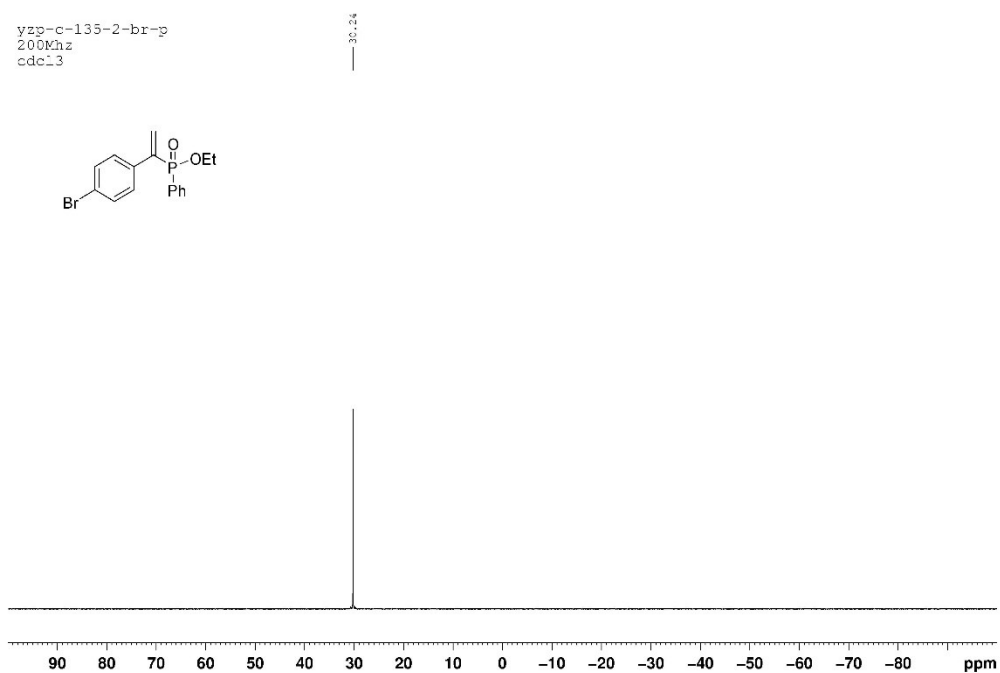

yzp-c-135-2-br  
125Mhz  
cdc13

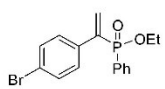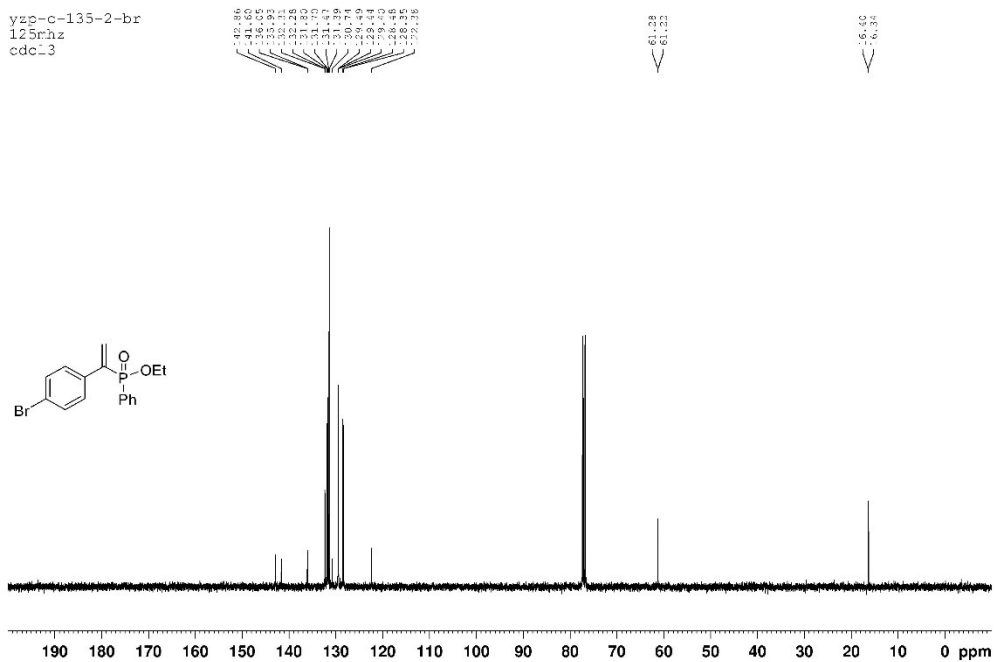

# Ethyl phenyl(1-(4-(trifluoromethyl)phenyl)vinyl)phosphinate (3ka)

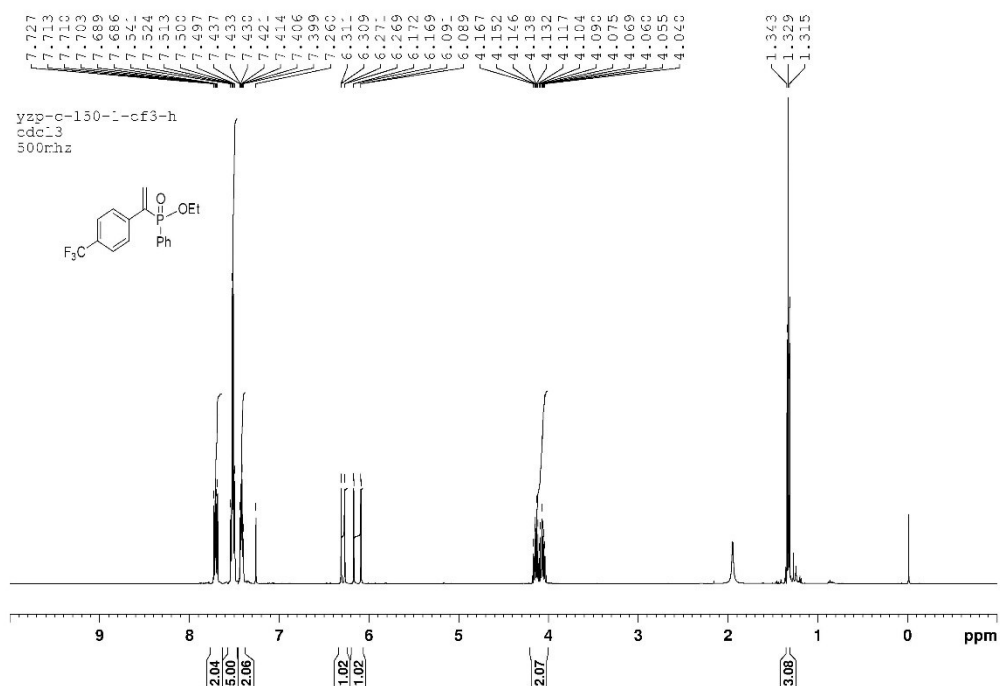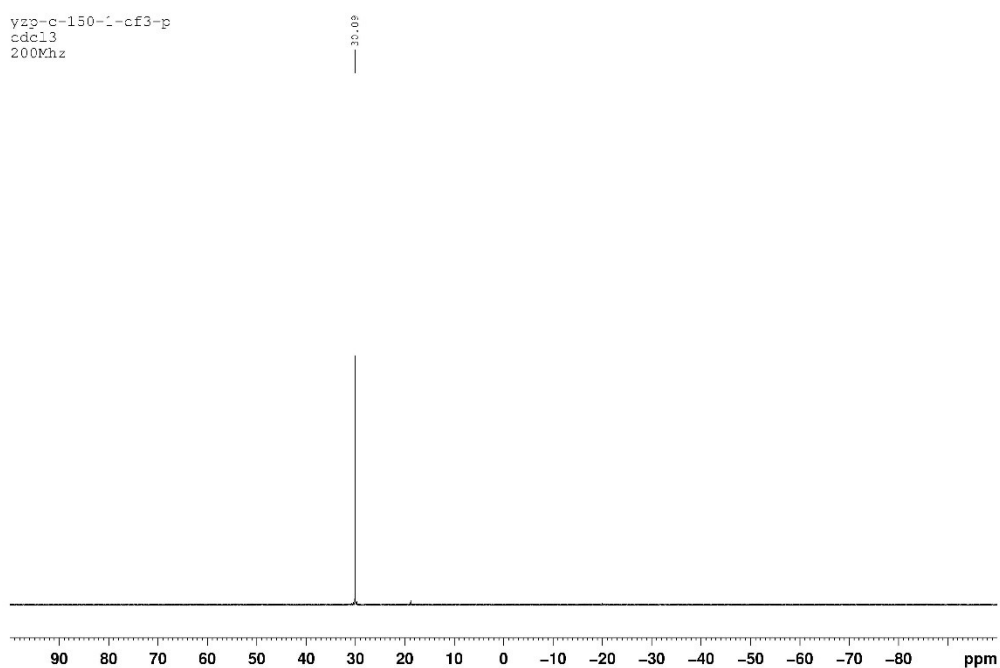



# **Ethyl (1-(4-methoxyphenyl)vinyl)(phenyl)phosphinate (3la)**

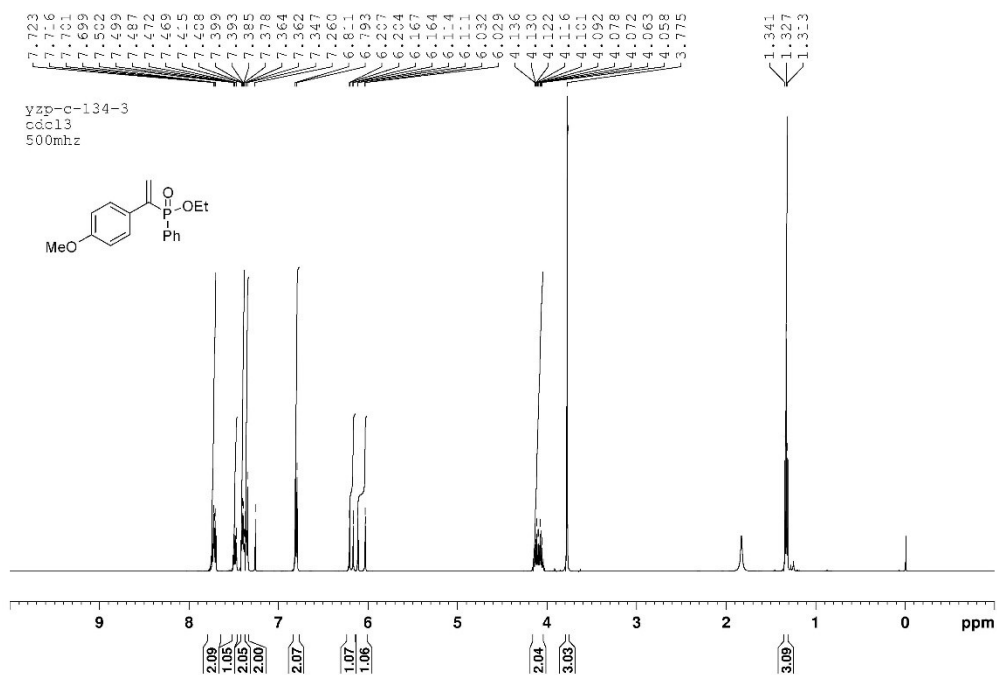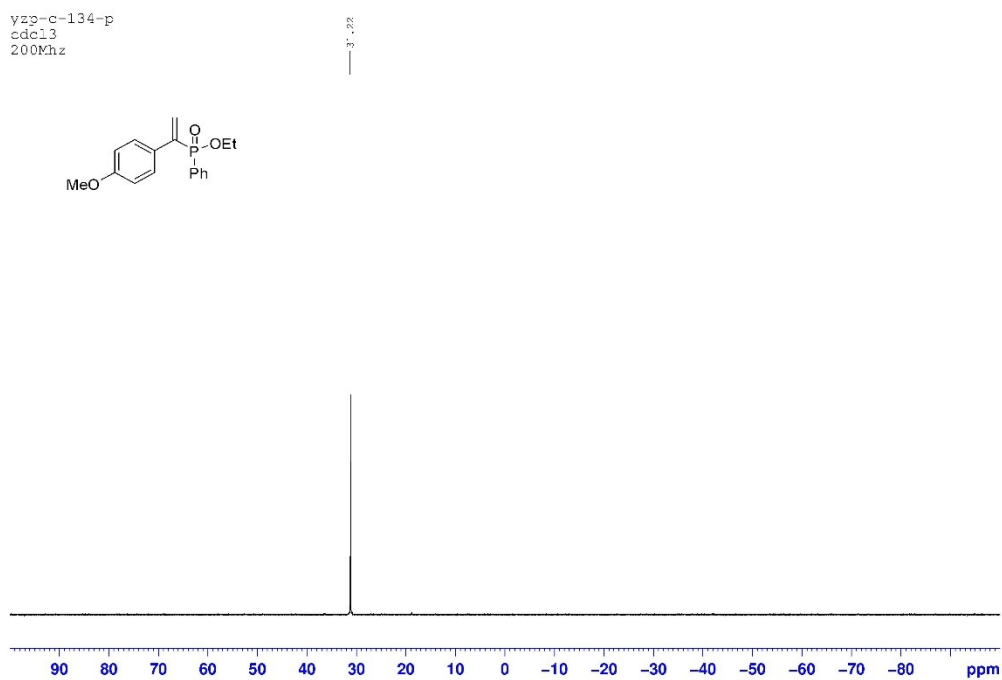





yzp-c-134-4-p  
cdcl3  
200MHz

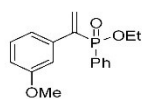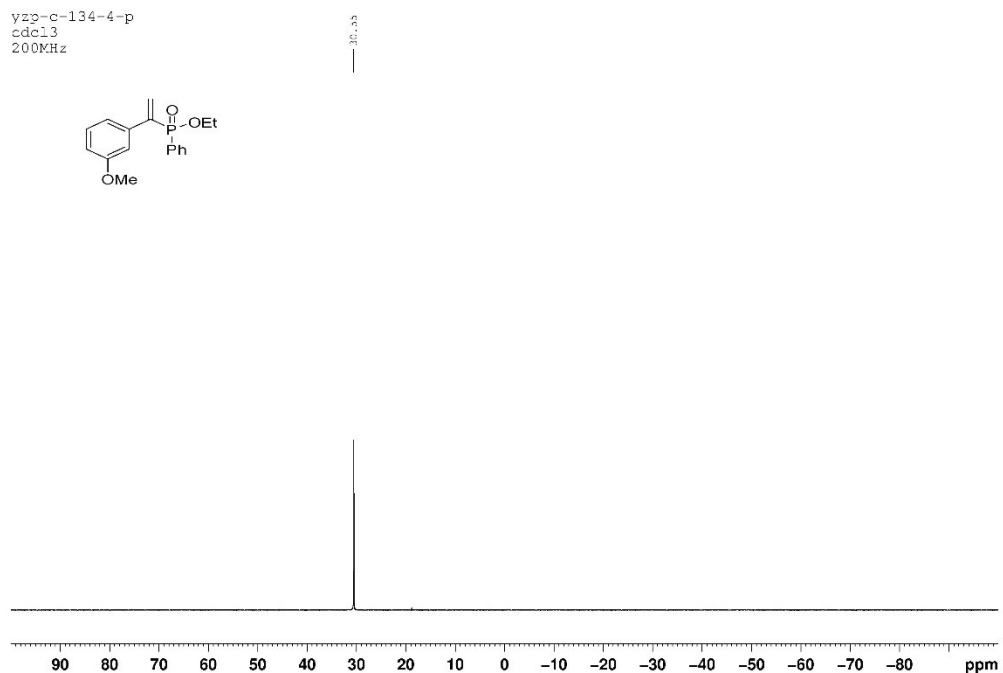

yzp-c-134-4-c  
cdcl3  
125MHz

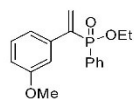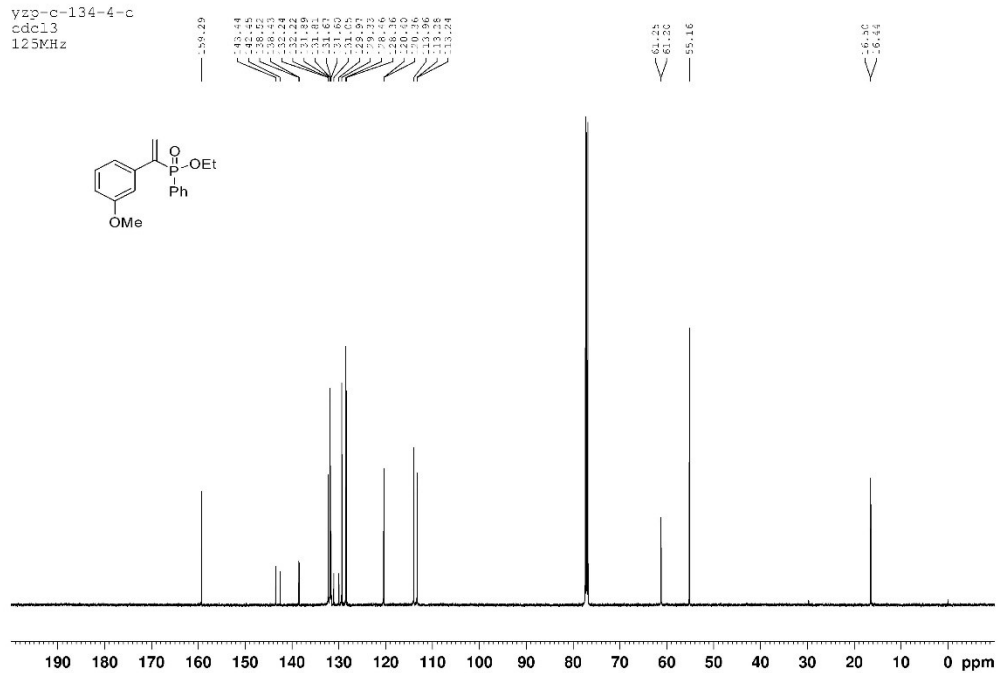

# Ethyl (1-(3-chlorophenyl)vinyl)(phenyl)phosphinate (3na)

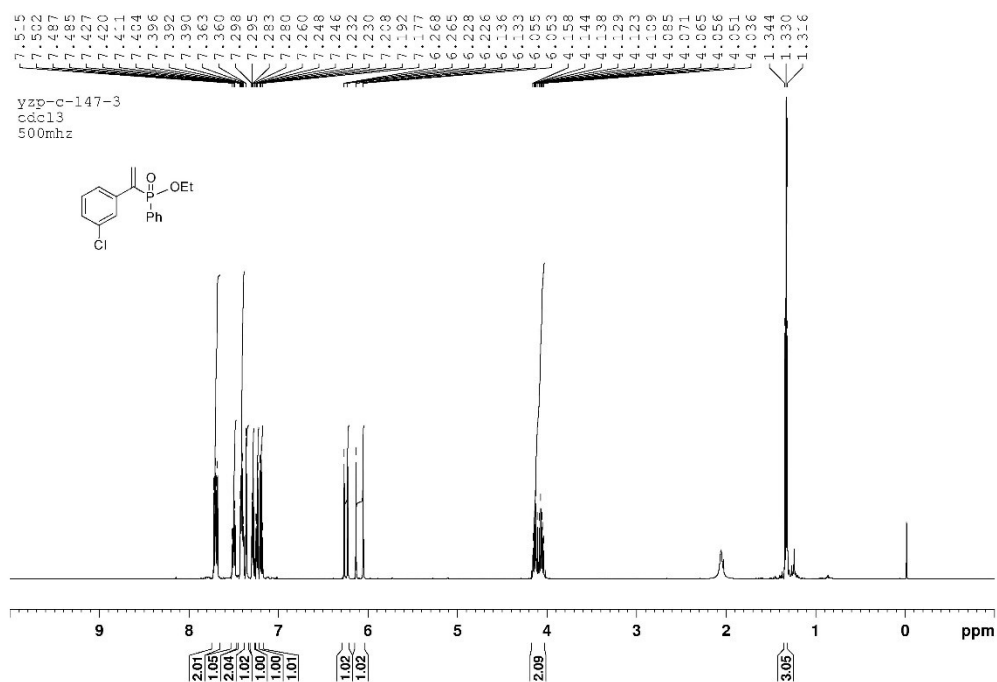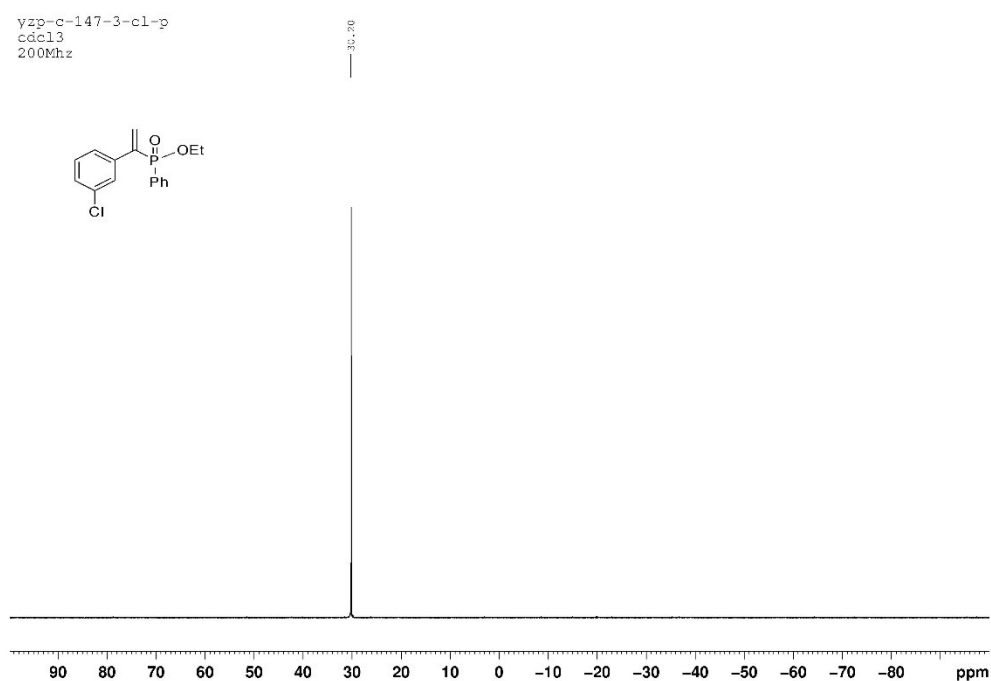

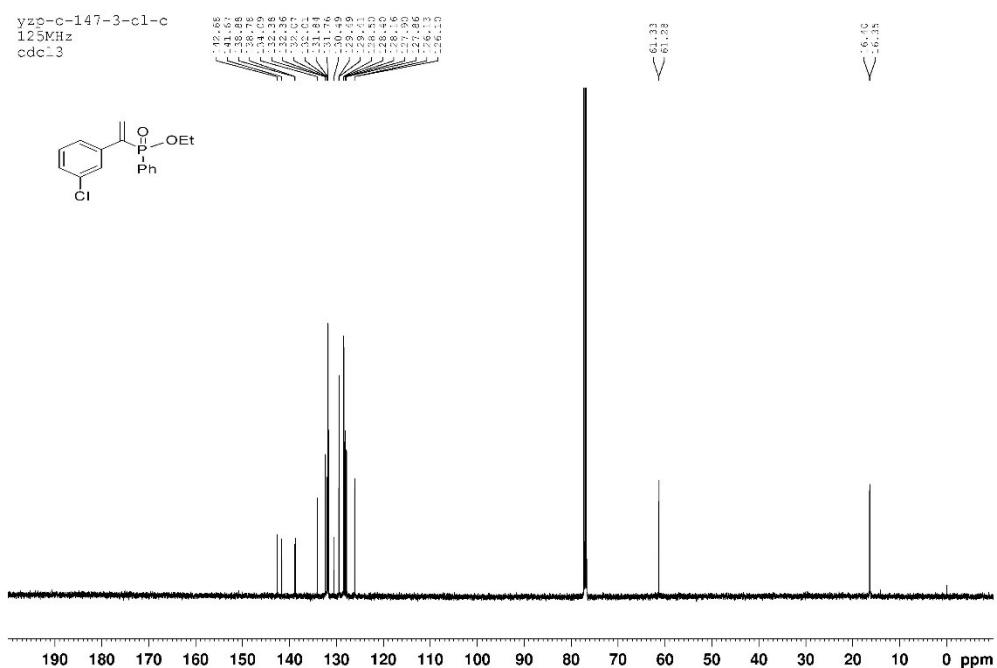

### Ethyl phenyl(1-(thiophen-2-yl)vinyl)phosphinate (30a)

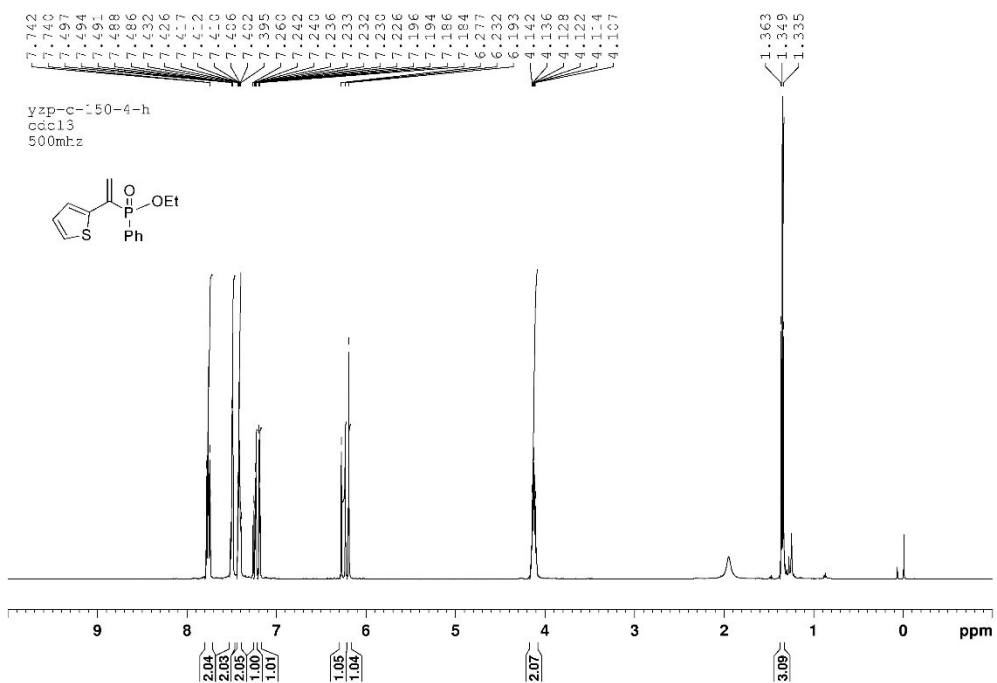

— 30.70

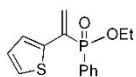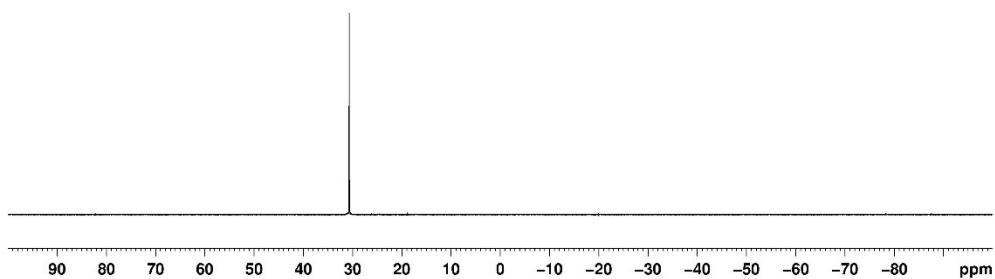

37.43  
36.78  
36.68  
36.42  
32.82  
32.22  
31.58  
31.50  
31.13  
30.05  
29.39  
29.32  
28.48  
28.38  
26.56  
26.40  
25.56  
23.95  
23.91

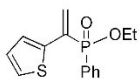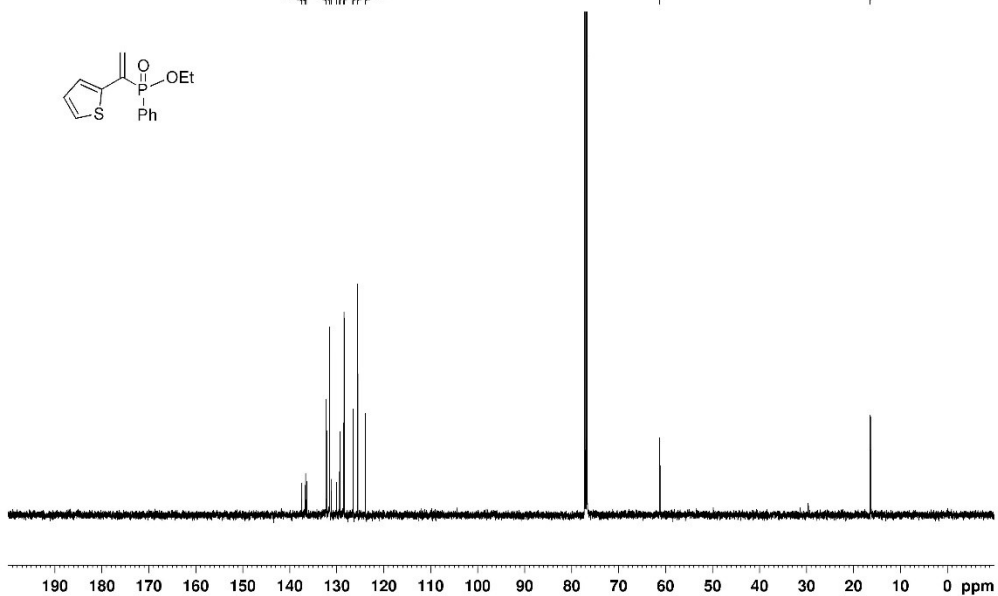

# Ethyl phenyl(1-(pyridin-3-yl)vinyl)phosphinate (3pa)

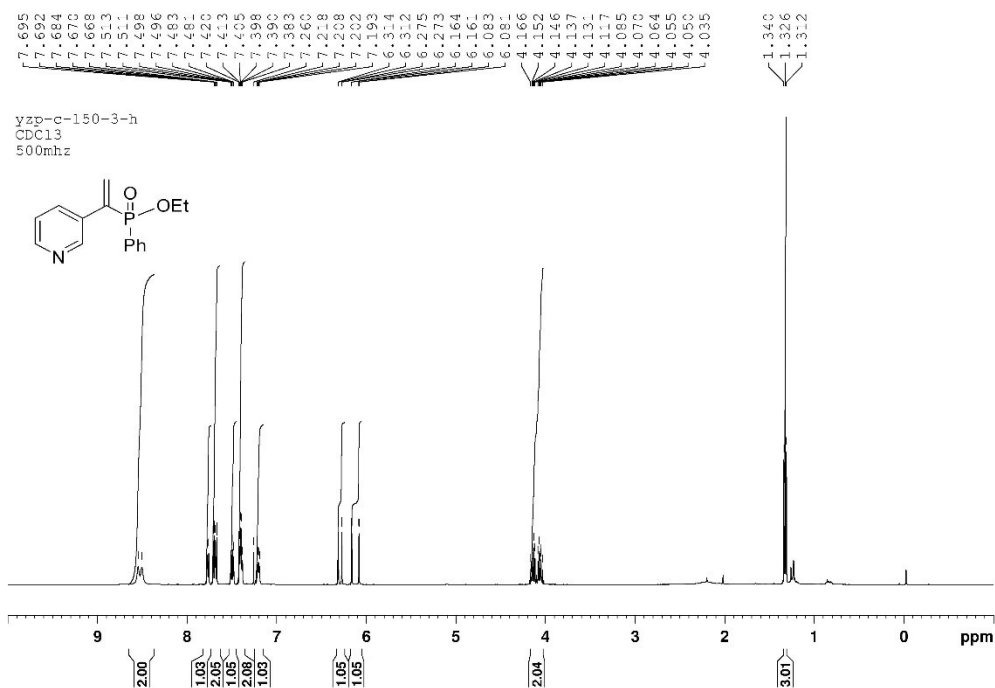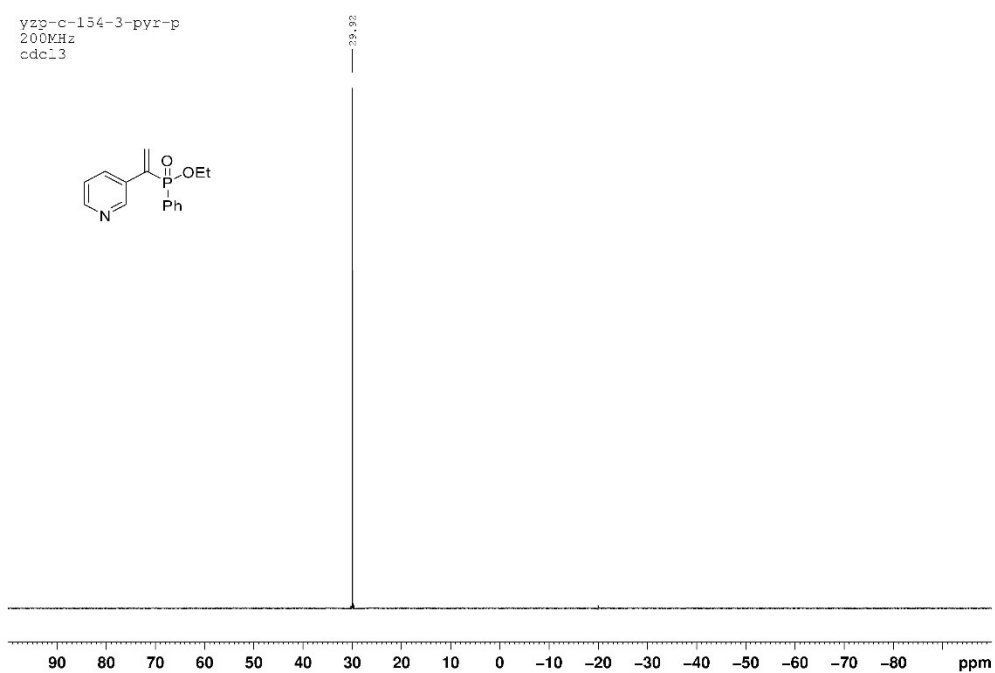

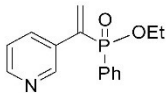

yzp-d-127-h  
CDCl<sub>3</sub>  
500Mhz

CCOP(=O)(c1ccccc1)/C=C/c2ccccc2

7.593  
7.592  
7.584  
7.578  
7.474  
7.466  
7.466  
7.366  
7.355  
7.346  
7.339  
7.339  
7.324  
7.324  
7.274  
7.274  
7.259  
7.259  
7.254  
7.254  
7.232  
7.227  
7.164  
7.159  
7.149  
7.126  
7.111  
7.097  
7.048  
7.033  
7.033  
6.991  
6.975  
4.117  
4.116  
4.115  
4.137  
4.136  
4.127  
4.112  
4.098  
4.092

1.356  
1.342  
1.328

103  
207  
108  
208  
305  
105  
207  
205  
200

2.02

3.07

ppm

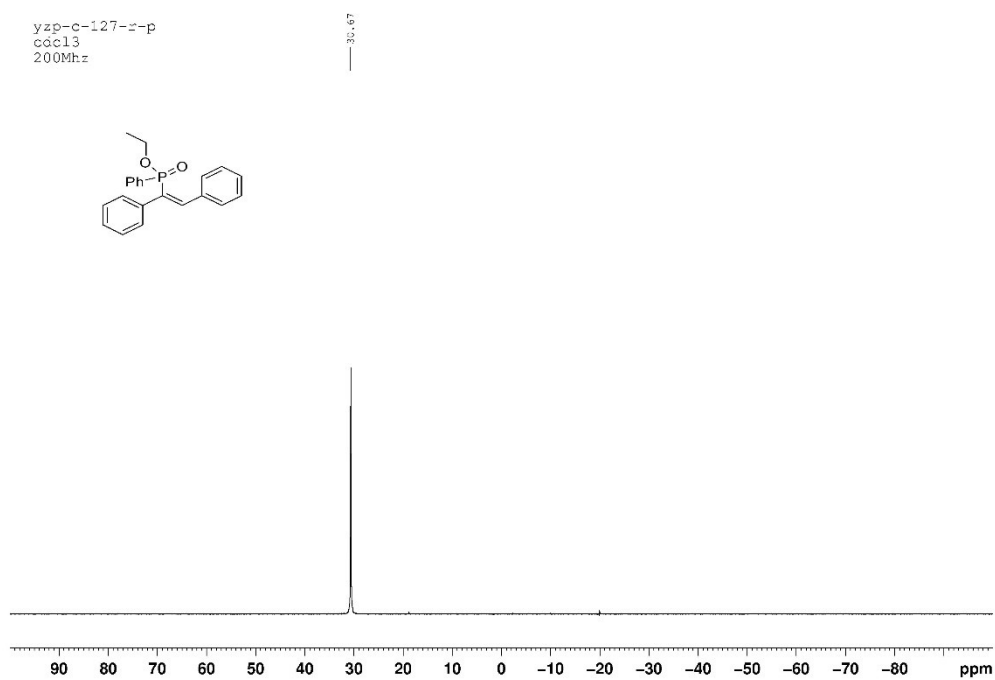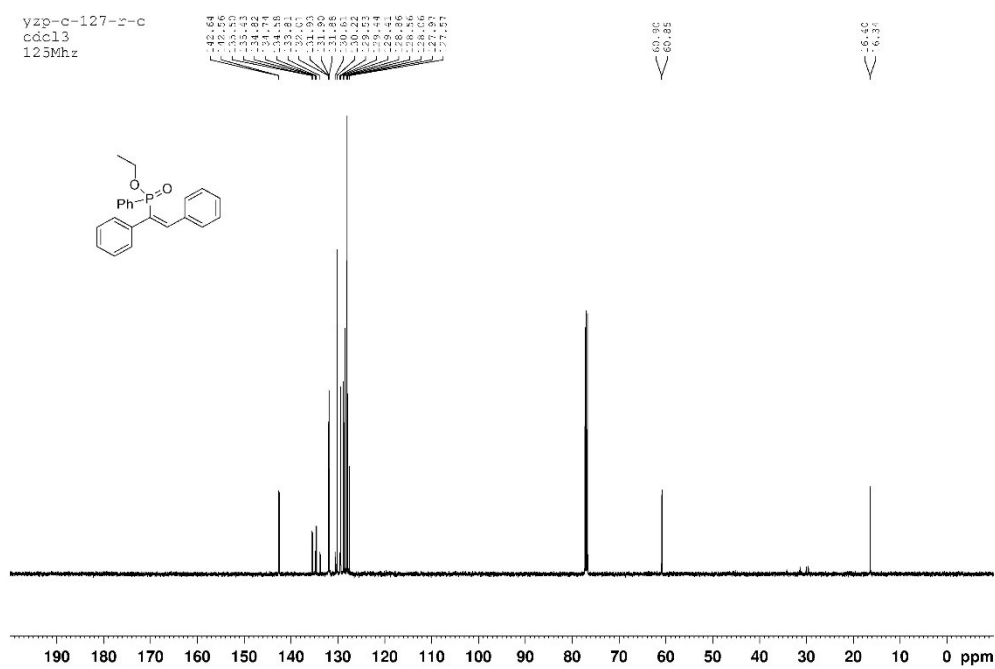



# Ethyl phenyl(4-phenylbut-1-en-2-yl)phosphinate (3ra)

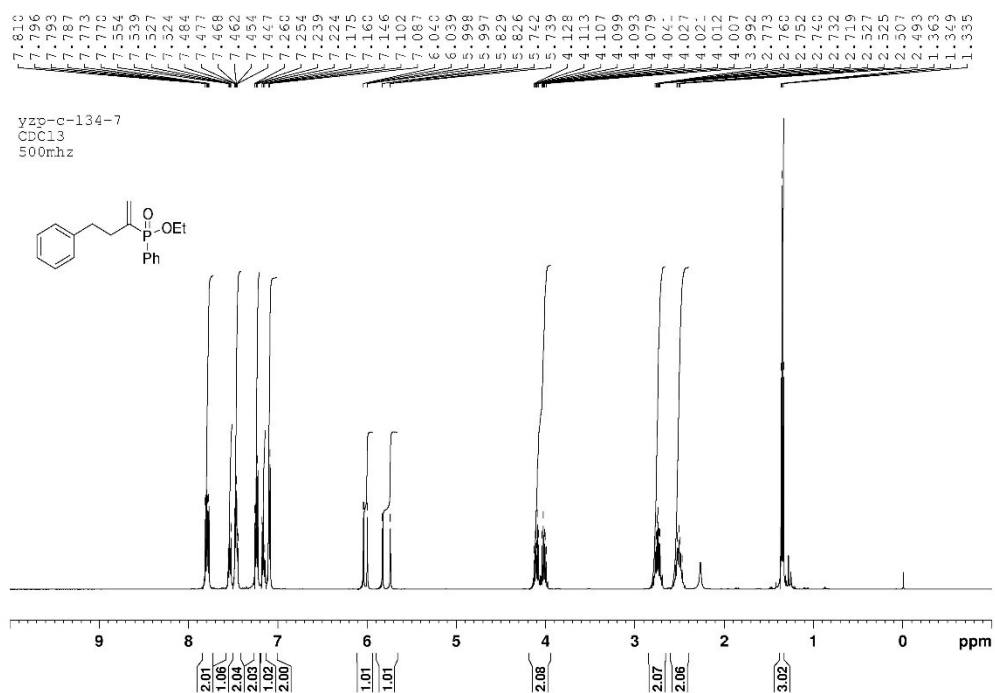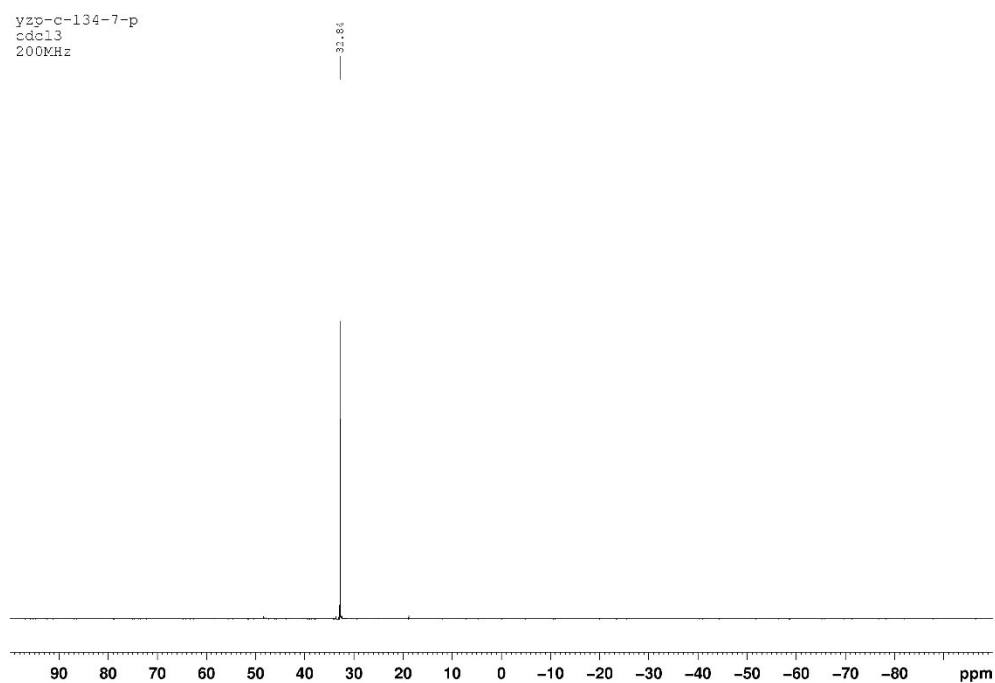

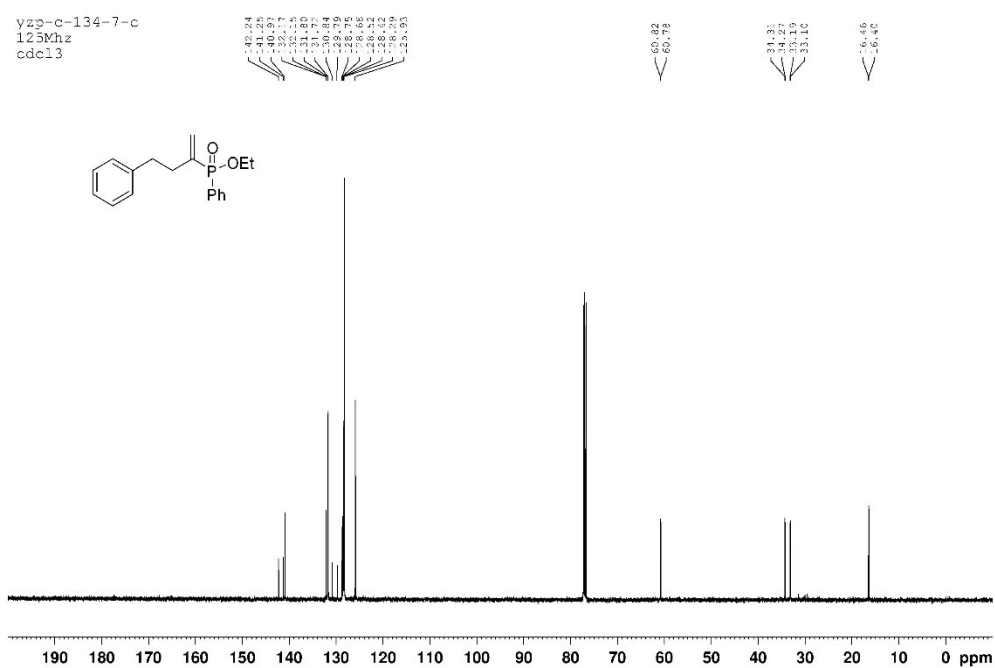

### Ethyl (1-(cyclohex-1-en-1-yl)vinyl)(phenyl)phosphinate (3sa)

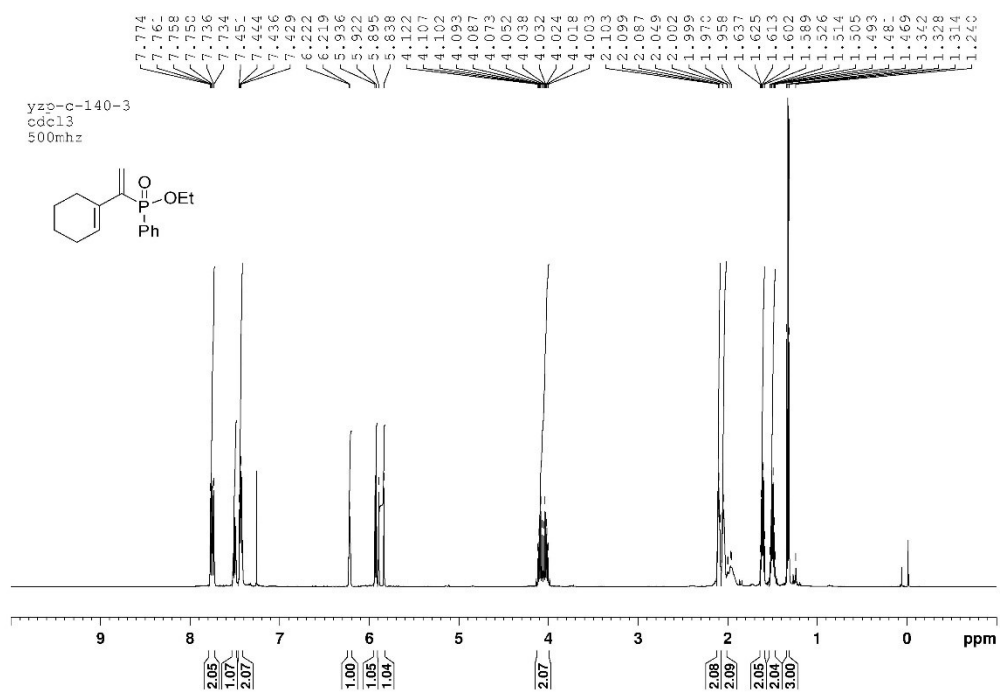

— 32.98

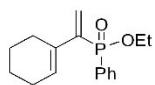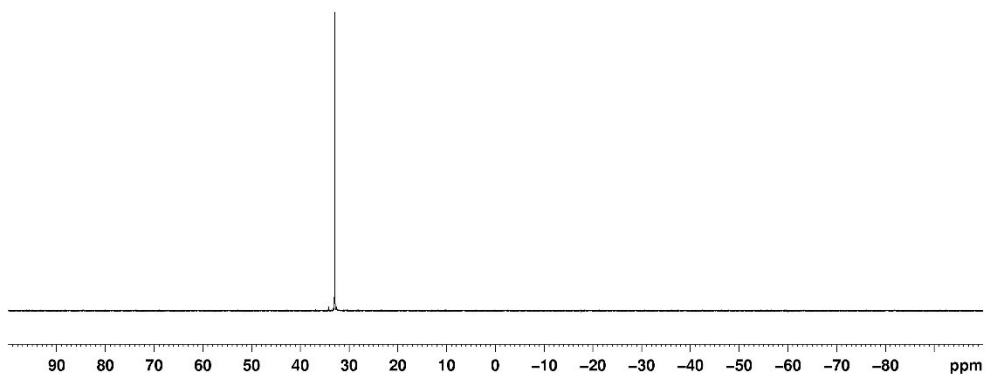

|       |       |
|-------|-------|
| 43.40 | 30.99 |
| 42.43 | 30.37 |
| 32.93 | 28.34 |
| 32.85 | 30.33 |
| 32.06 | 28.23 |
| 31.90 | 26.50 |
| 31.88 | 26.54 |
| 31.52 |       |
| 31.44 |       |

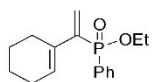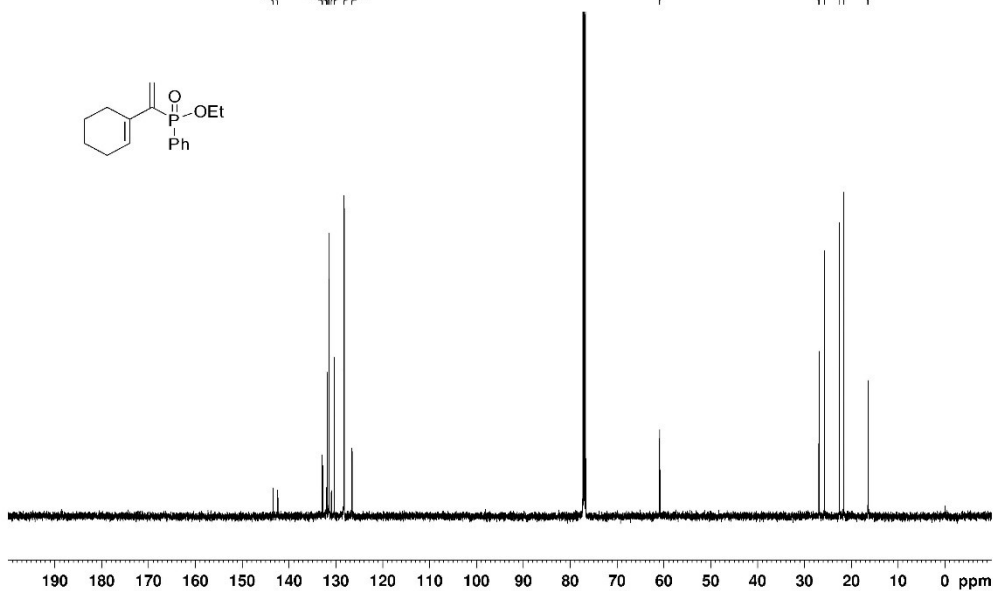

# Ethyl dec-1-en-5-yn-2-yl(phenyl)phosphinate (3ta)

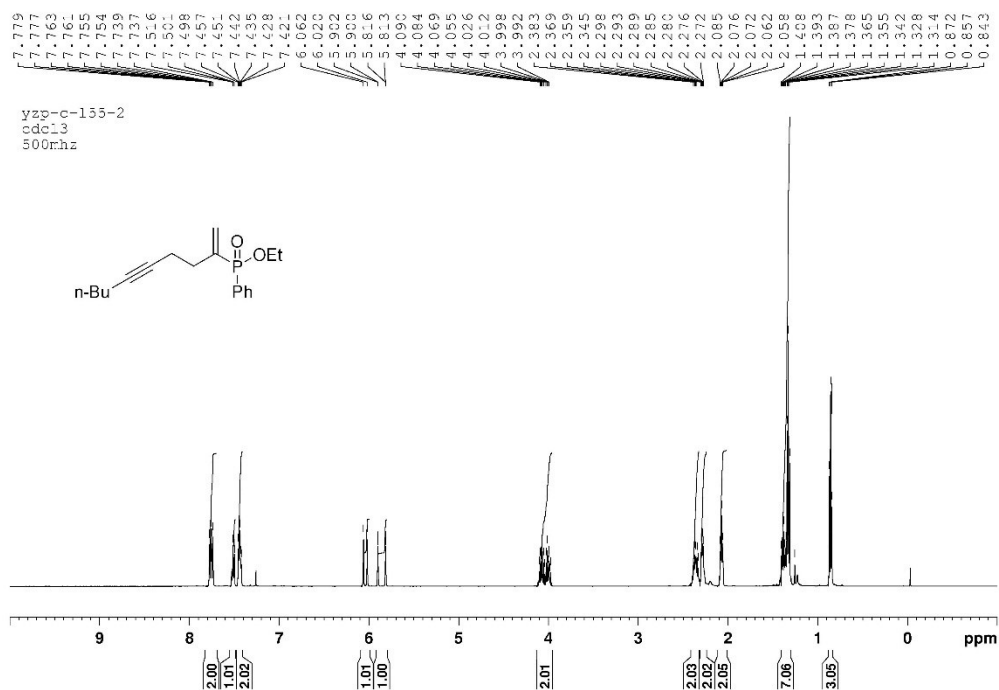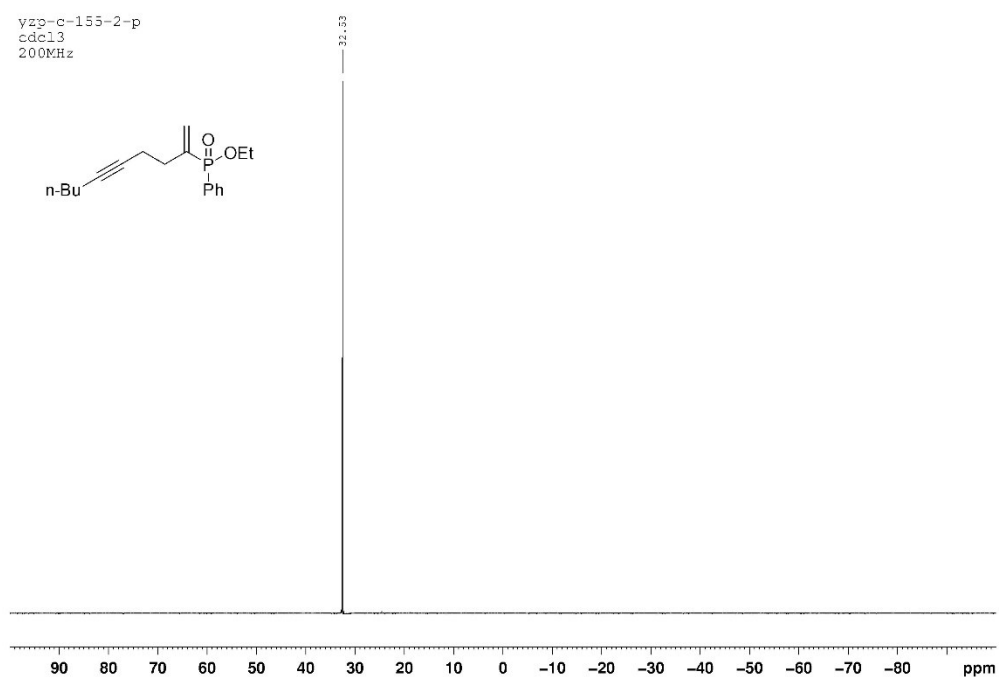

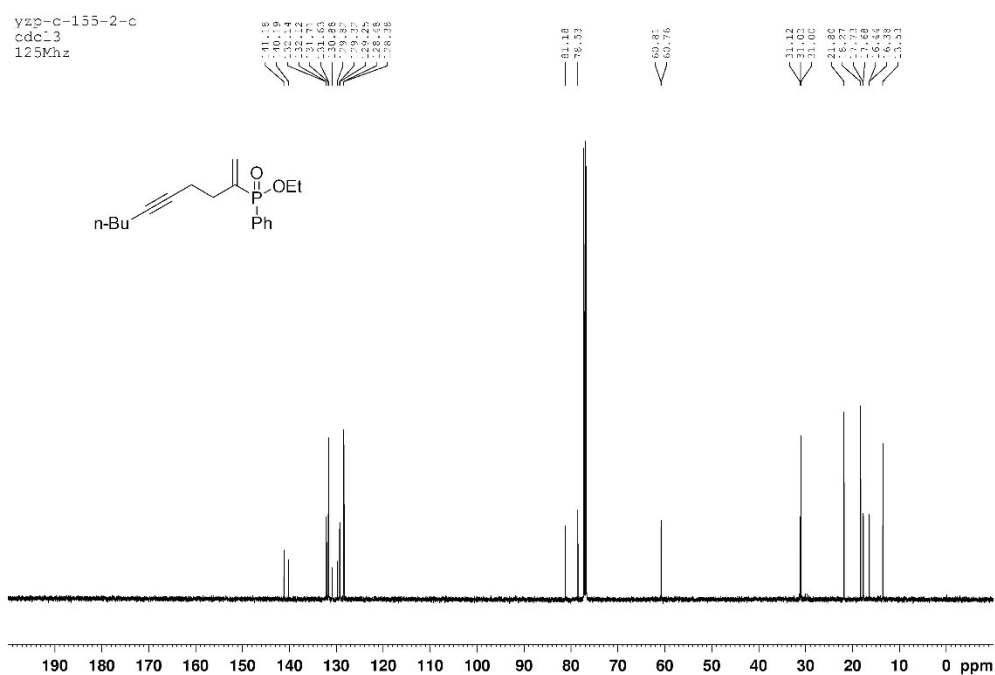

### Methyl phenyl(1-phenylvinyl)phosphinate (3ab)

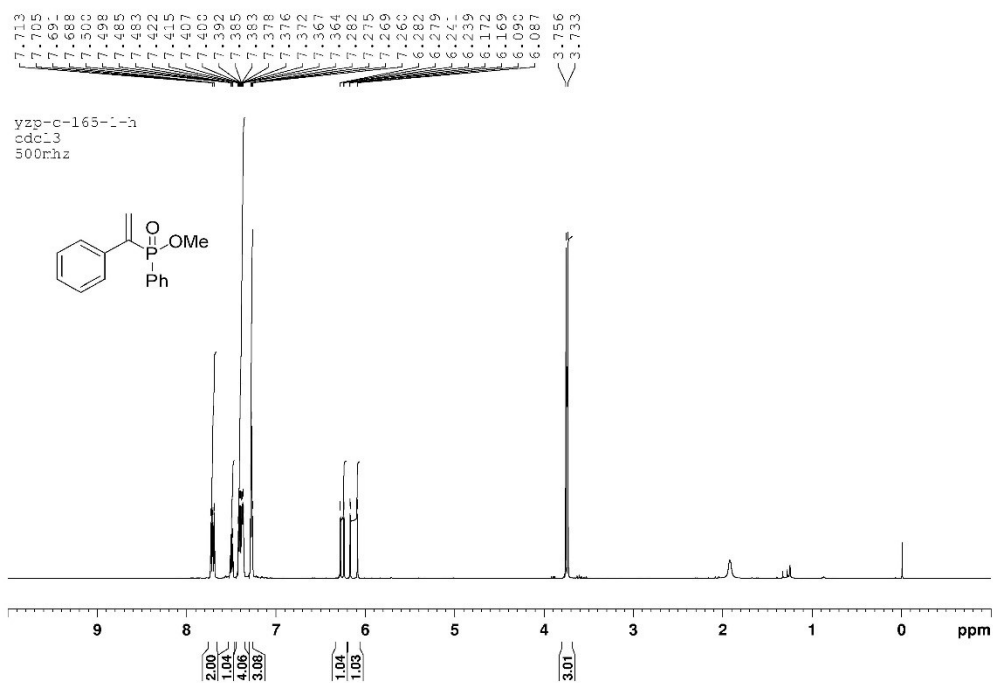

yzp-c-165-1-p  
cdcl3  
200Mhz

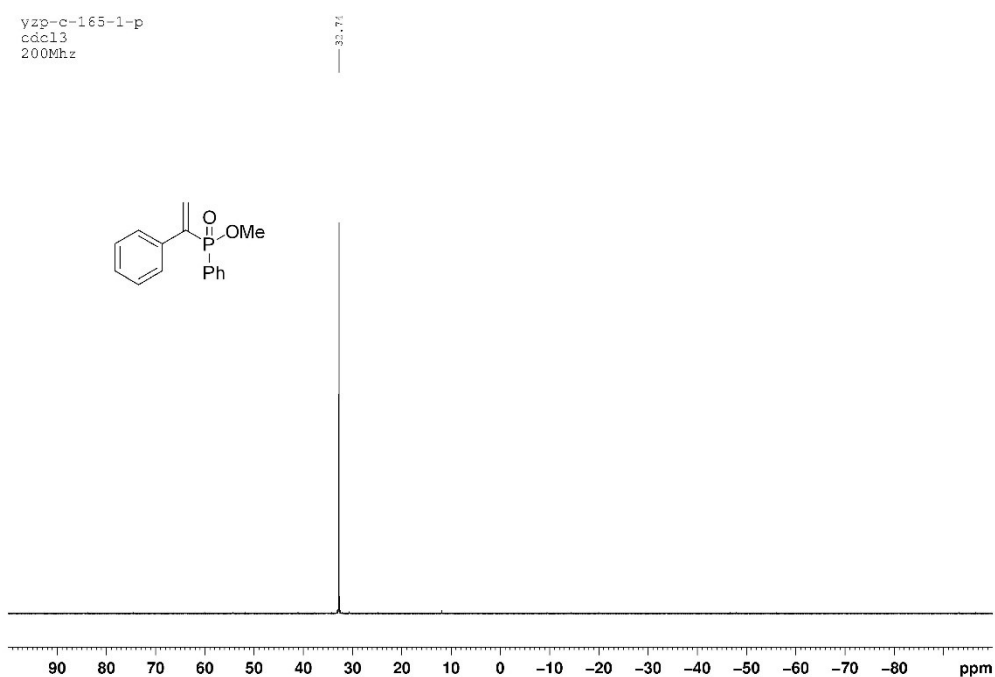

yzp-c-165-c  
cdcl3  
125mhz

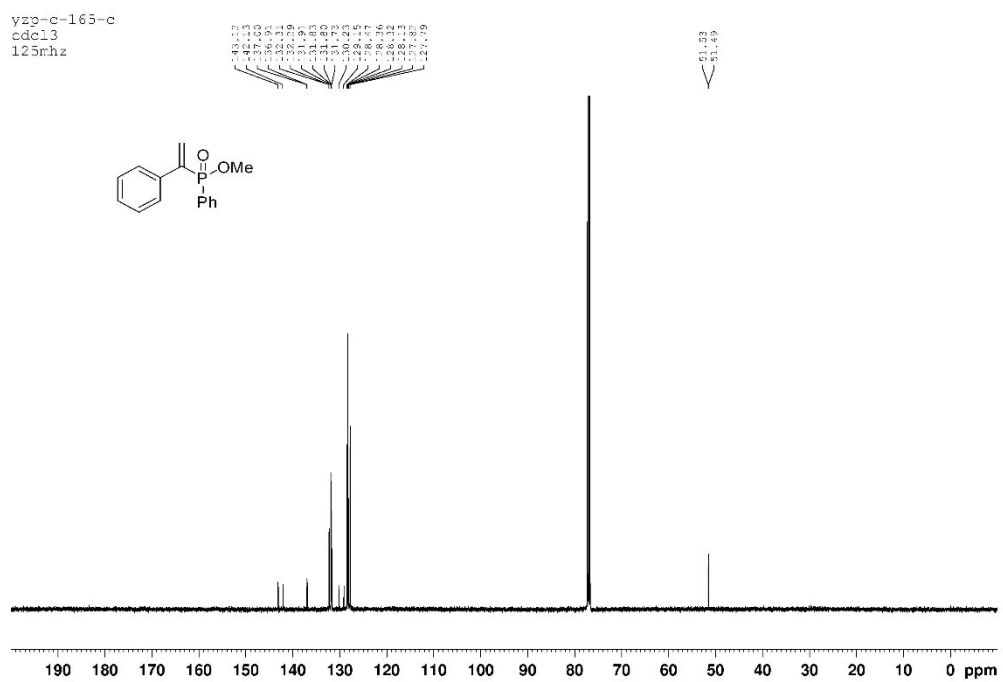

# Propyl phenyl(1-phenylvinyl) phosphinate (3ac)

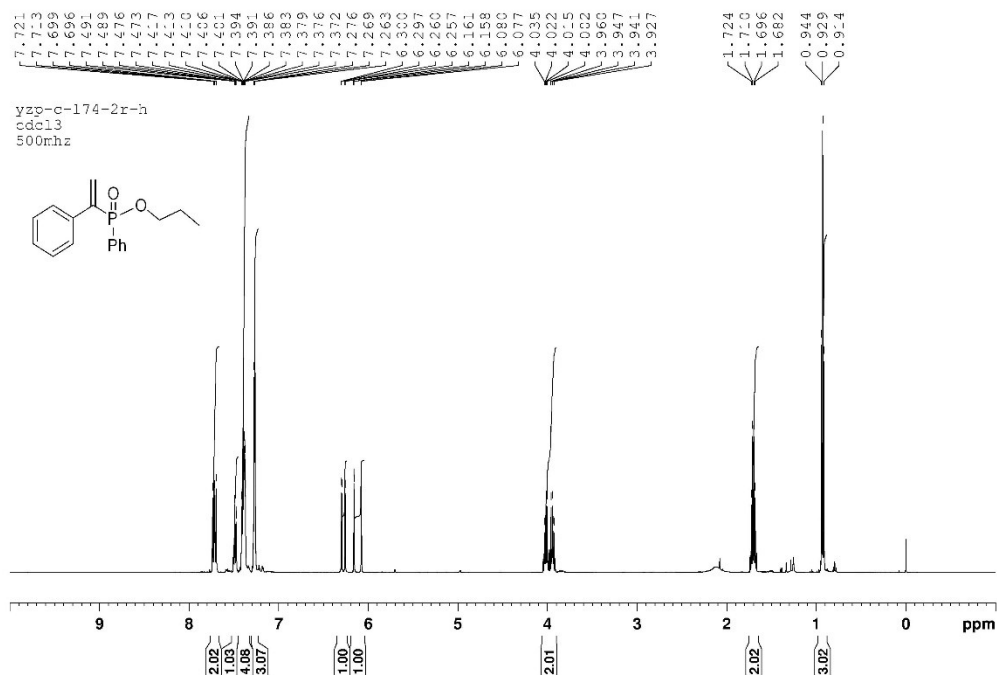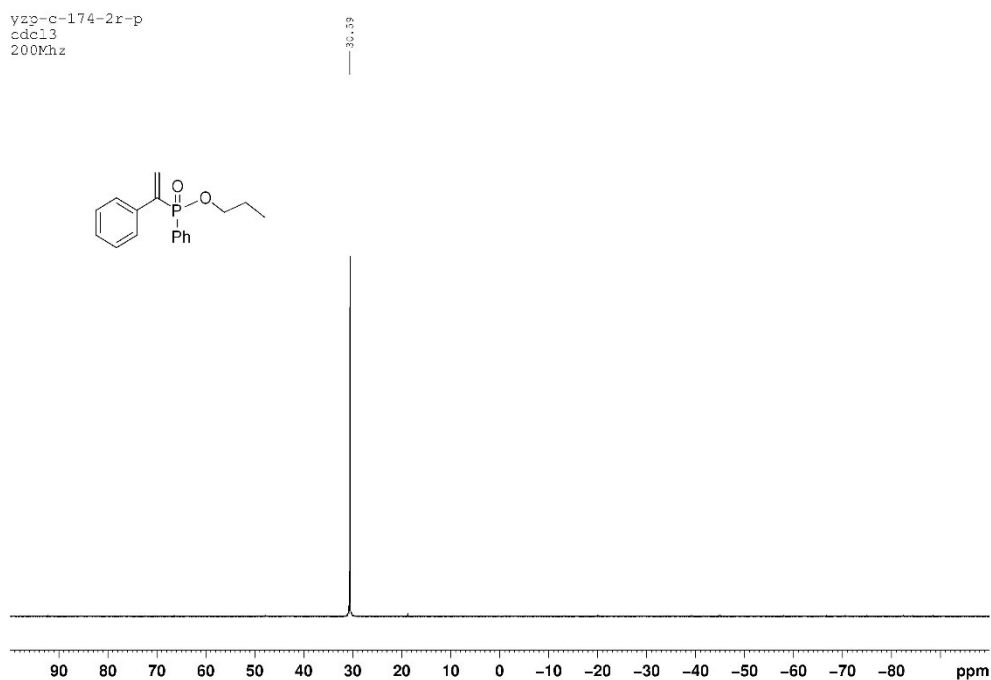

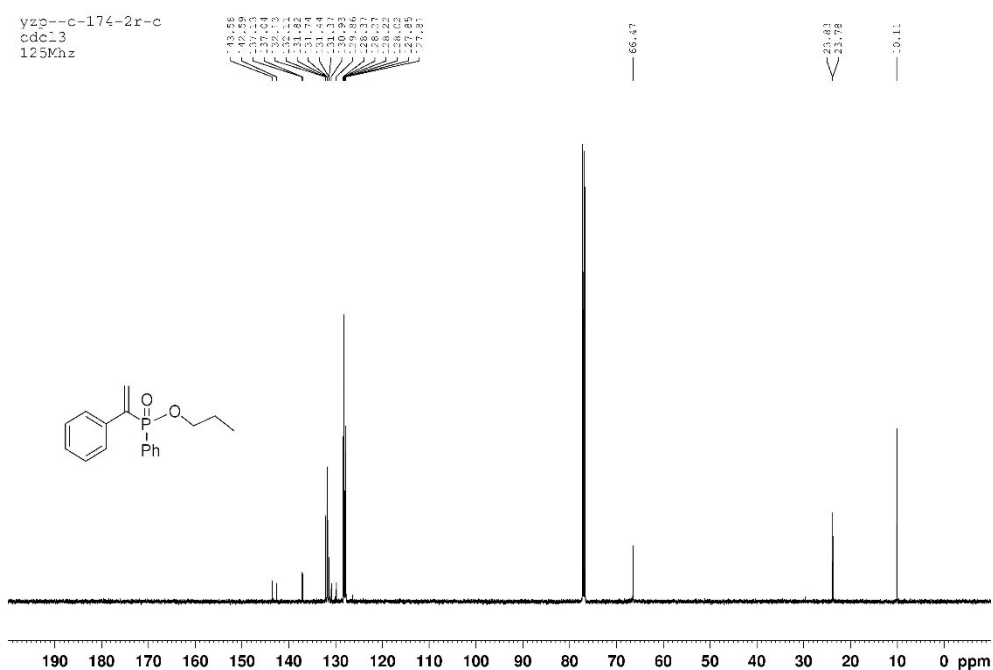

### Isopropyl phenyl(1-phenylvinyl)phosphinate (3ad)

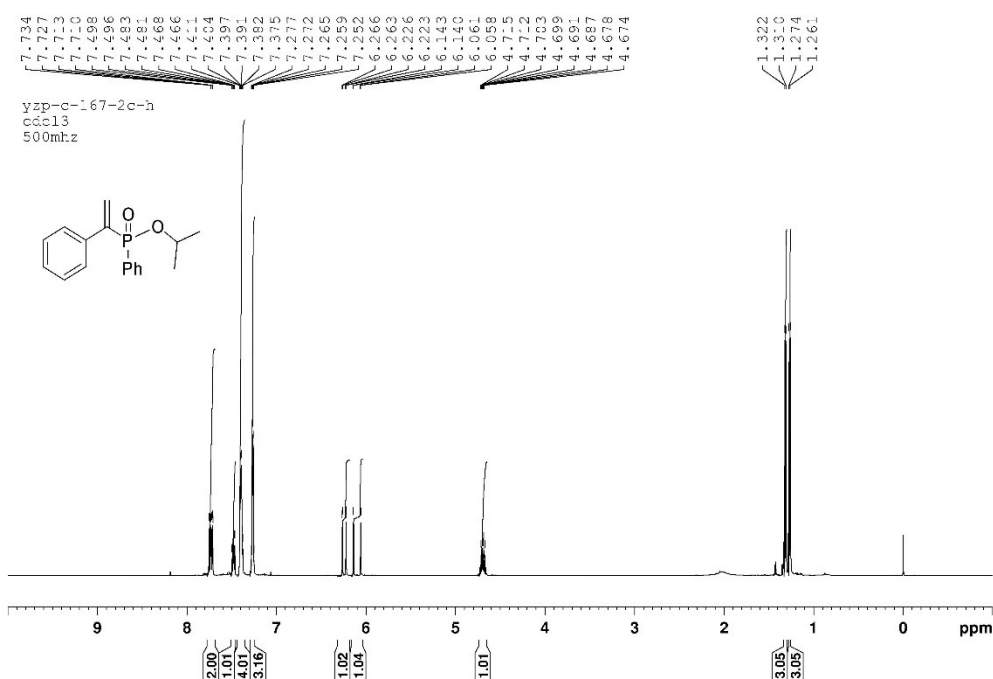



yzp-c-167-2c-p  
cdcl3  
200Mh

— 29.36

O=P(c1ccccc1)OC(c2ccccc2)c3ccccc3[illegible]

# **Ethyl (1-phenylvinyl)(*p*-tolyl)phosphinate (3ae)**

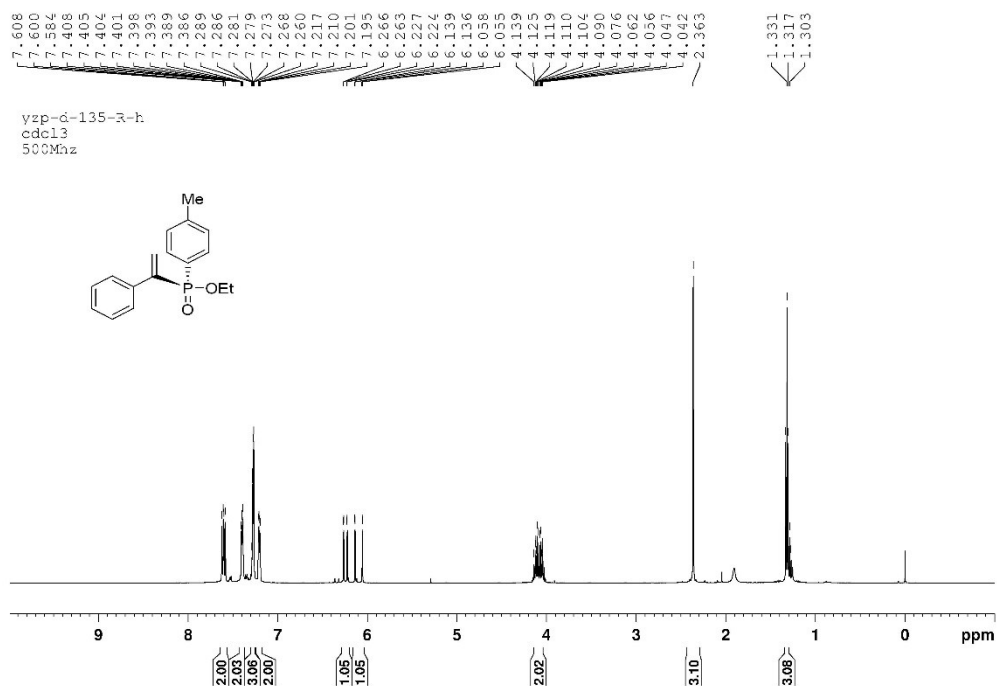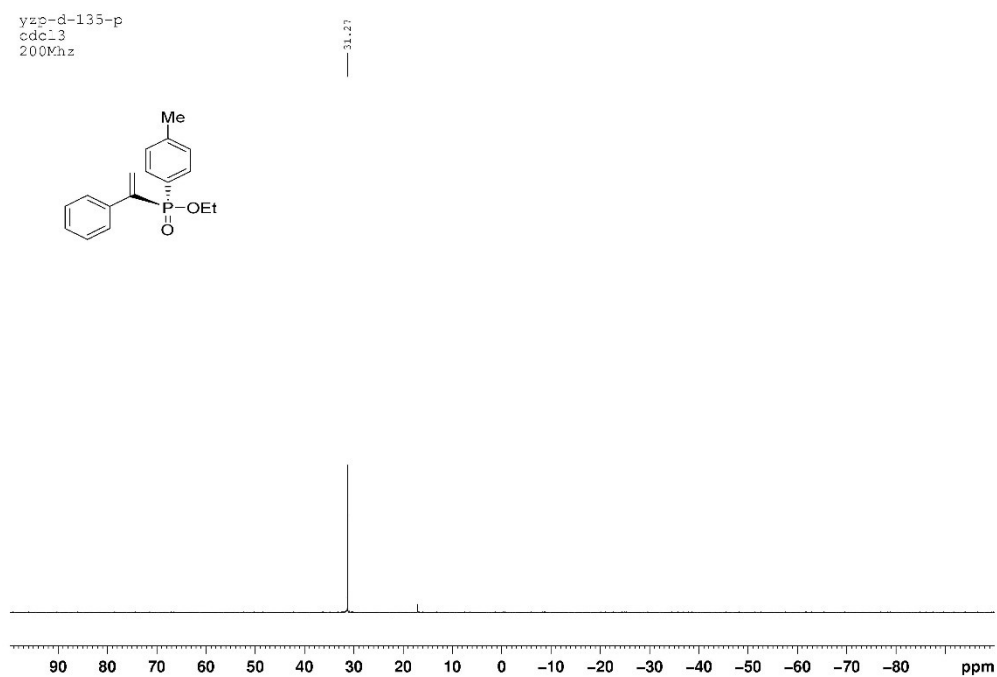

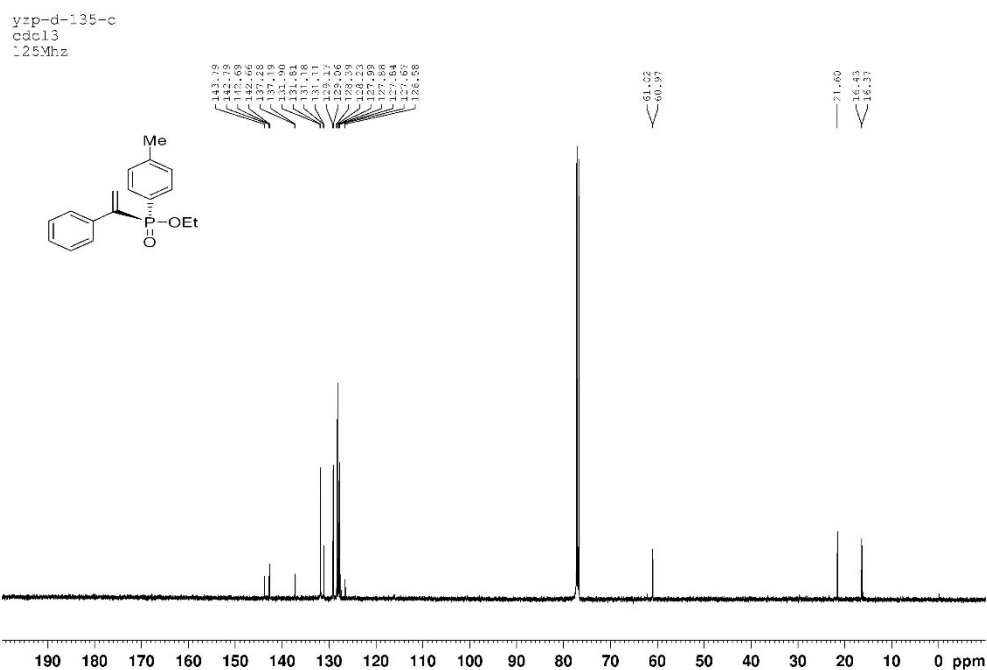

### Methyl (1-(4-(*tert*-butyl)phenyl)vinyl)(phenyl)phosphinate (3fb)

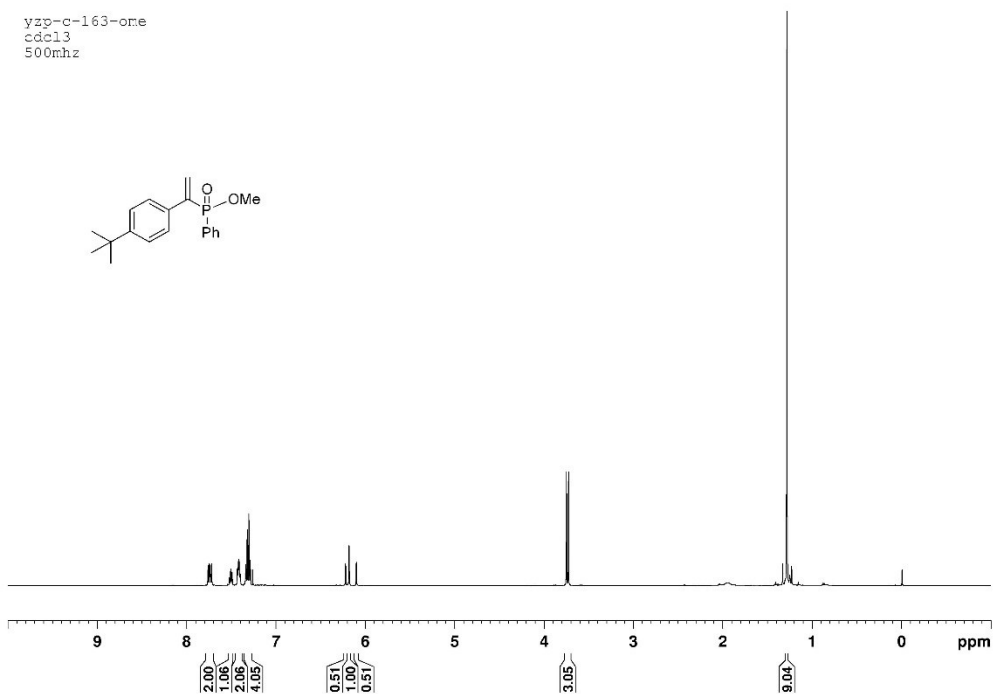

y2p-c-163-ome-p  
cdcl3  
200MHz

33.22

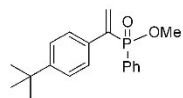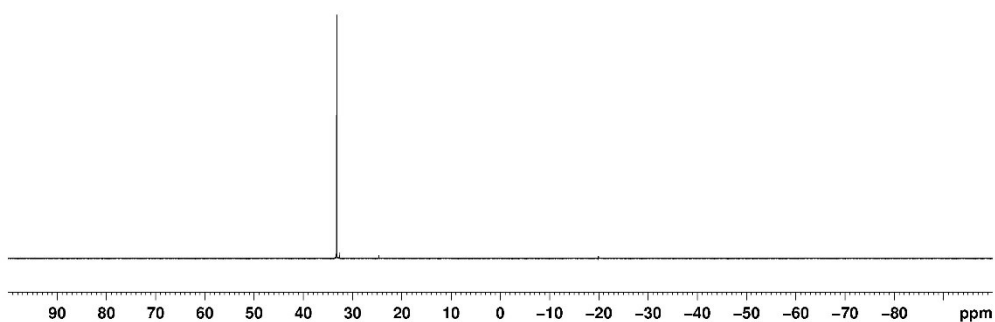

y2p-c-163-ome-c  
cdcl3  
125MHz

151.18  
147.66  
147.65  
133.90  
133.81  
133.81  
133.23  
131.89  
131.88  
131.26  
131.19  
129.42  
129.42  
128.47  
128.36  
127.36  
127.29

51.45  
51.44

34.49  
31.18

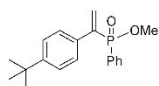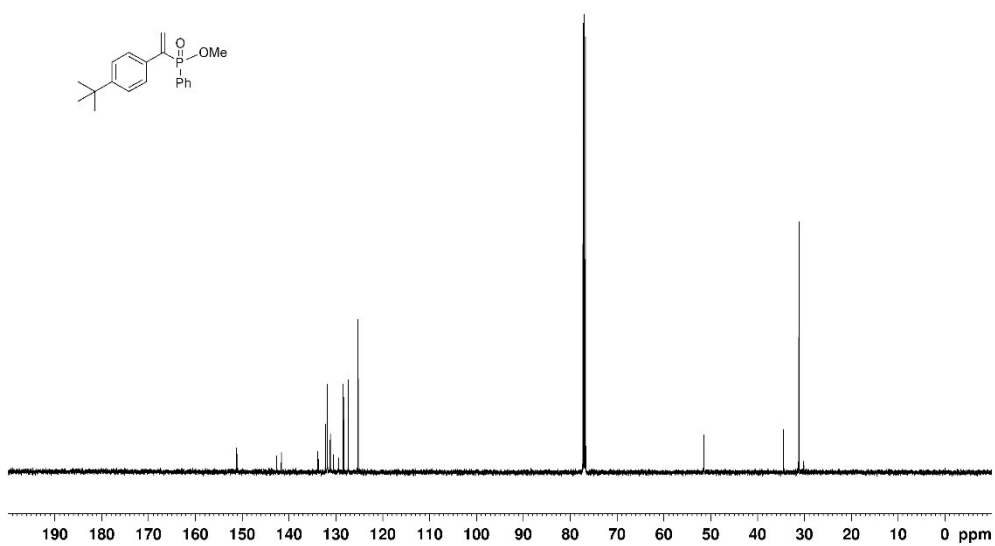

# Methyl(phenyl)(1-phenylvinyl)phosphine oxide (3af)

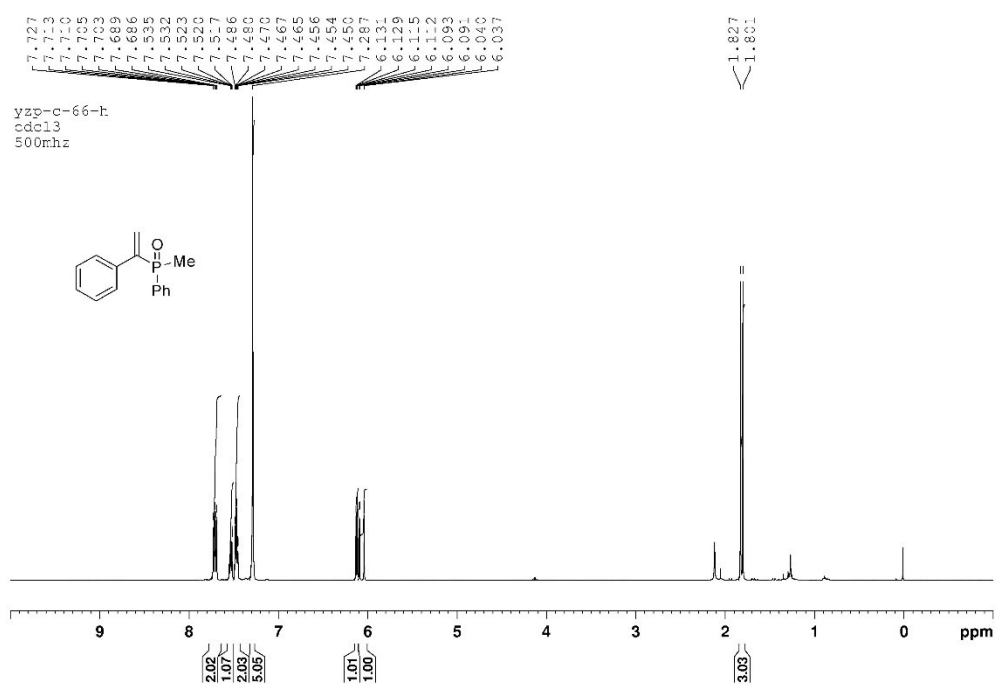



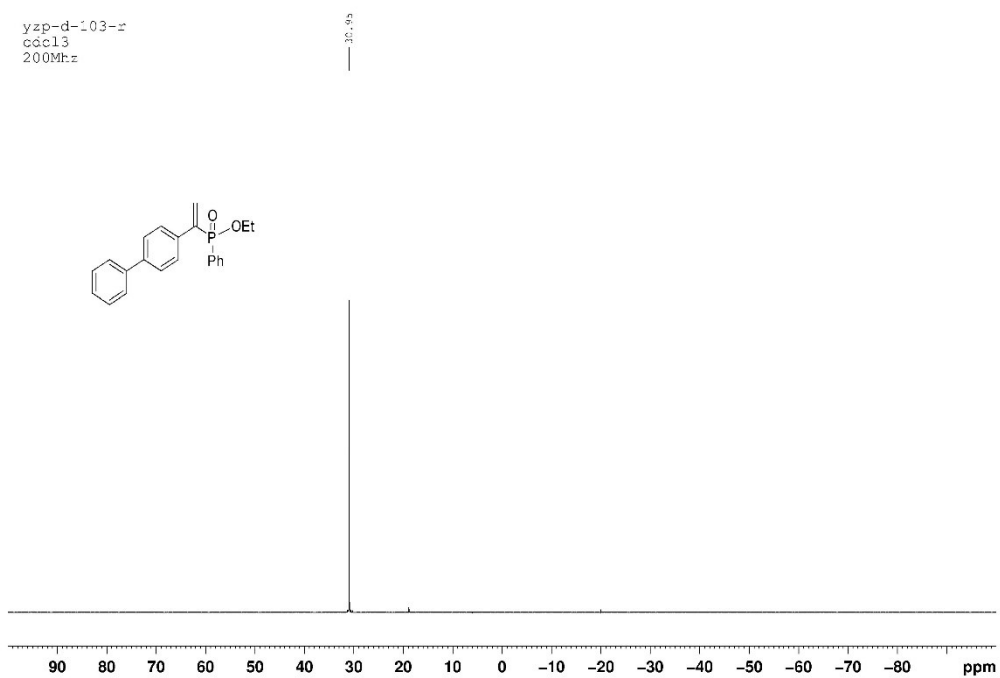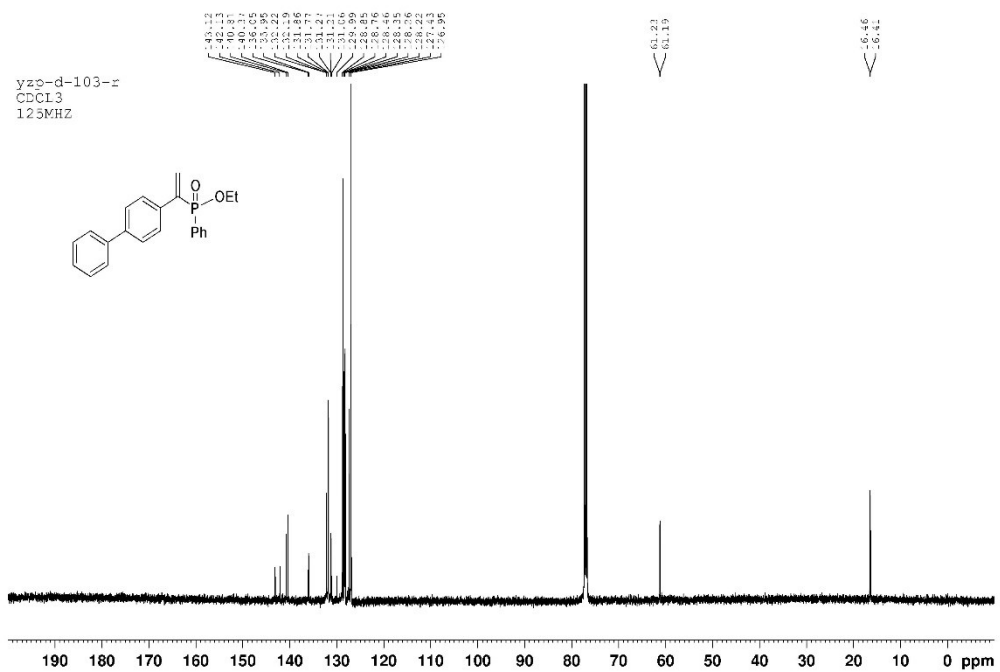

# Ethyl (1-(4-(benzo[d][1,3]dioxol-5-yl)phenyl)vinyl)(phenyl)phosphinate (5)

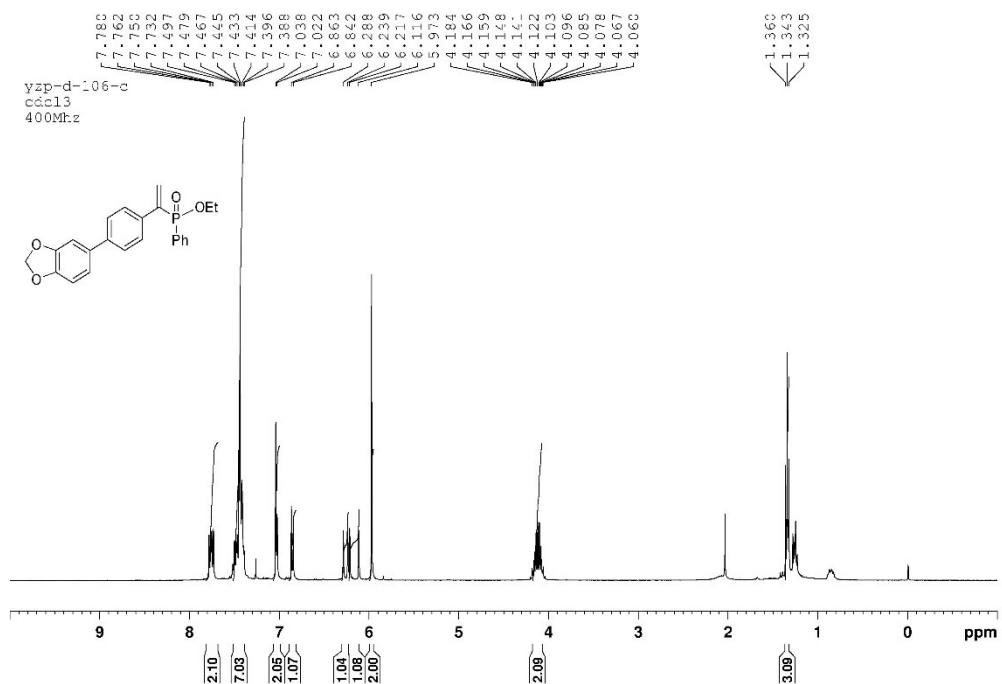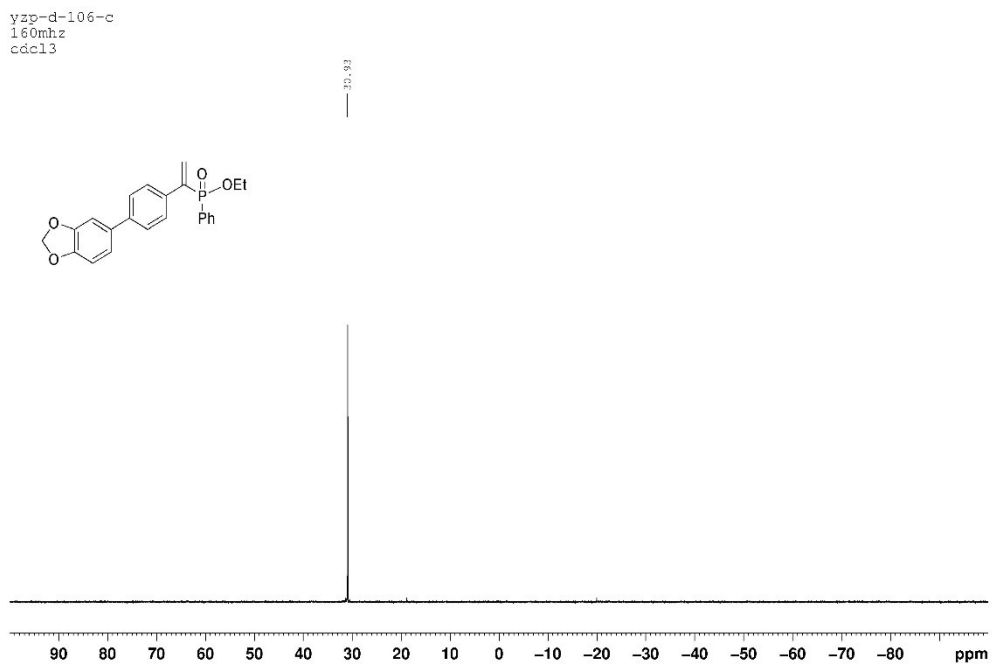



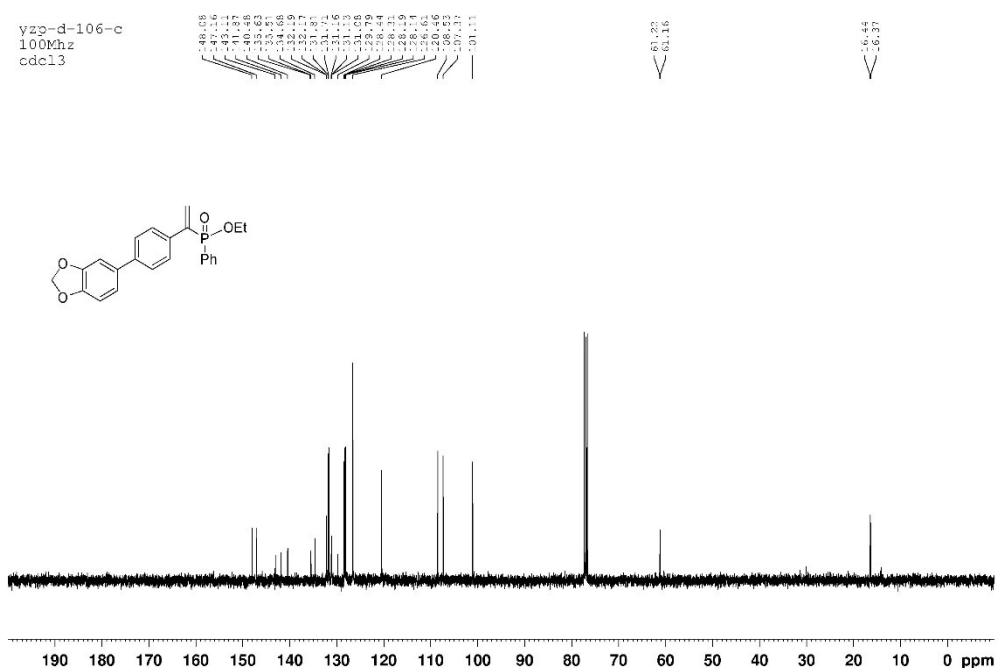

### Ethyl (2-(diphenylphosphaneyl)-1-phenylethyl)(phenyl)phosphinate (6)

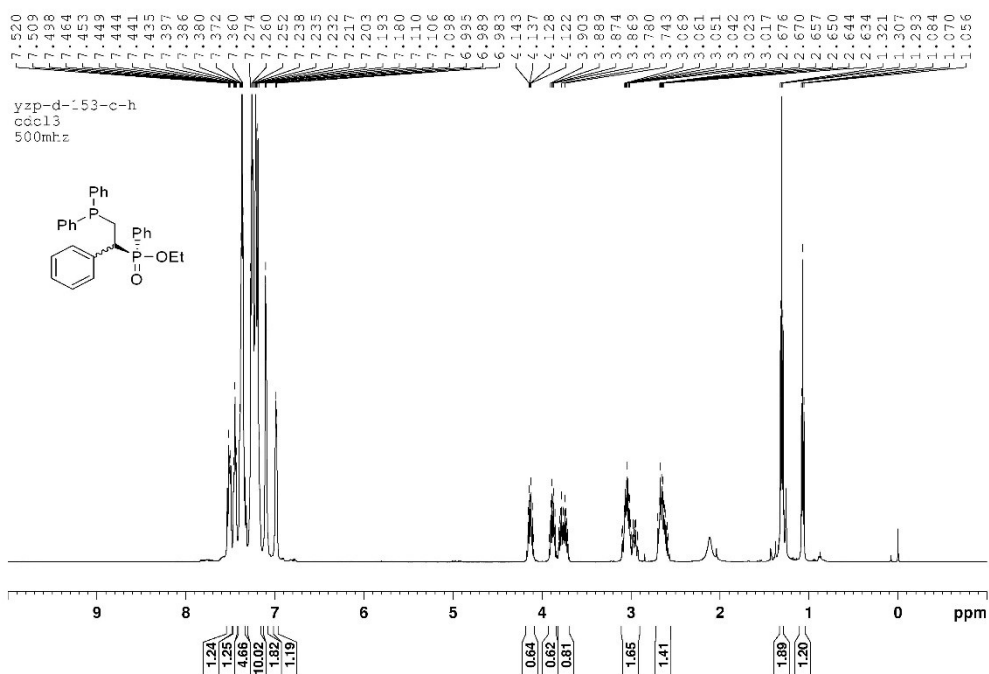



## 8. HPLC spectrum

### Ethyl phenyl(1-phenylvinyl)phosphinate (3aa)

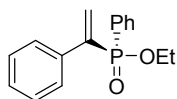

Additional Info : Peak(s) manually integrated

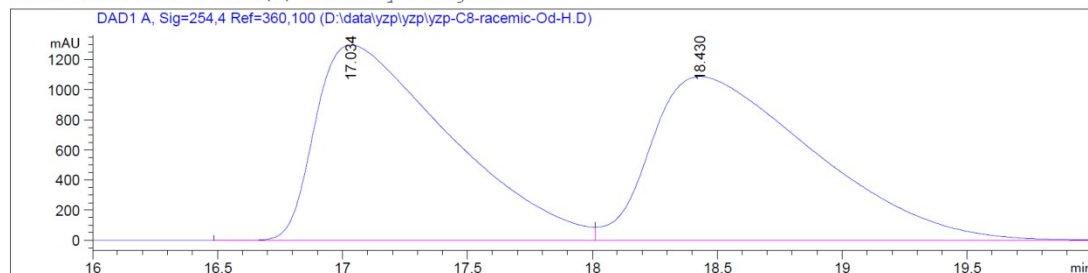

Signal 1: DAD1 A, Sig=254,4 Ref=360,100

| Peak # | RetTime [min] | Type | Width [min] | Area [mAU*s] | Height [mAU] | Area %  |
|--------|---------------|------|-------------|--------------|--------------|---------|
| 1      | 17.034        | BV   | 0.5613      | 4.83012e4    | 1300.63135   | 49.5106 |
| 2      | 18.430        | VB   | 0.6996      | 4.92561e4    | 1089.20264   | 50.4894 |

Totals : 9.75574e4 2389.83398

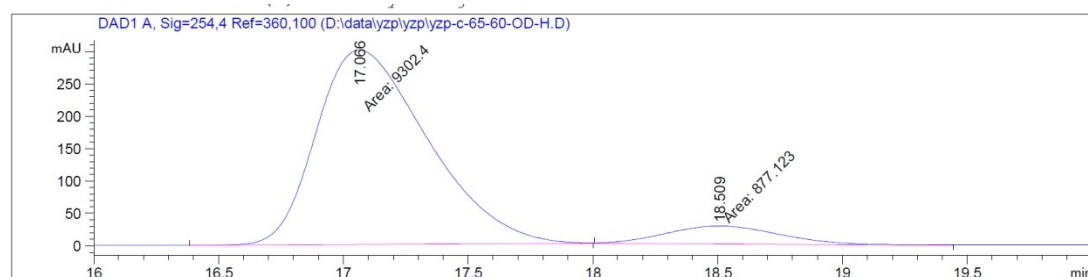

Signal 1: DAD1 A, Sig=254,4 Ref=360,100

| Peak # | RetTime [min] | Type | Width [min] | Area [mAU*s] | Height [mAU] | Area %  |
|--------|---------------|------|-------------|--------------|--------------|---------|
| 1      | 17.066        | MM   | 0.5170      | 9302.40039   | 299.89902    | 91.3835 |
| 2      | 18.509        | MM   | 0.5262      | 877.12329    | 27.78295     | 8.6165  |

Totals : 1.01795e4 327.68197

### Ethyl phenyl(1-(*p*-tolyl)vinyl)phosphinate (3ba)

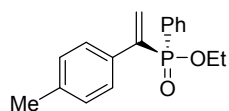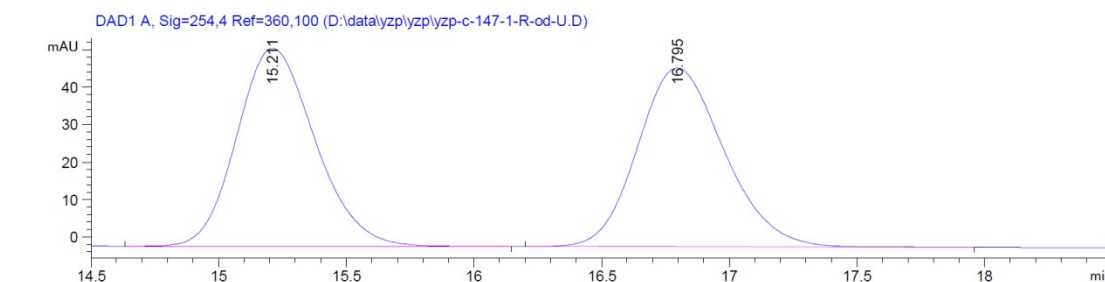

Signal 1: DAD1 A, Sig=254,4 Ref=360,100

| Peak # | RetTime [min] | Type | Width [min] | Area [mAU*s] | Height [mAU] | Area %  |
|--------|---------------|------|-------------|--------------|--------------|---------|
| 1      | 15.211        | BB   | 0.3308      | 1127.07507   | 52.85910     | 49.9613 |
| 2      | 16.795        | BB   | 0.3659      | 1128.82263   | 47.73948     | 50.0387 |

Totals : 2255.89771 100.59859

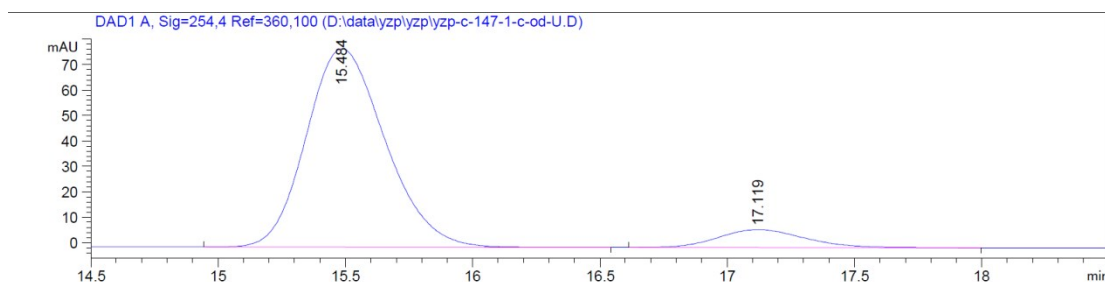

Signal 1: DAD1 A, Sig=254,4 Ref=360,100

| Peak # | RetTime [min] | Type | Width [min] | Area [mAU*s] | Height [mAU] | Area %  |
|--------|---------------|------|-------------|--------------|--------------|---------|
| 1      | 15.484        | BB   | 0.3341      | 1685.26575   | 78.00603     | 90.9952 |
| 2      | 17.119        | BB   | 0.3671      | 166.77249    | 7.07304      | 9.0048  |

Totals : 1852.03824 85.07908

### Ethyl phenyl(1-(*m*-tolyl)vinyl)phosphinate (3ca)

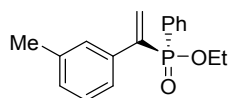

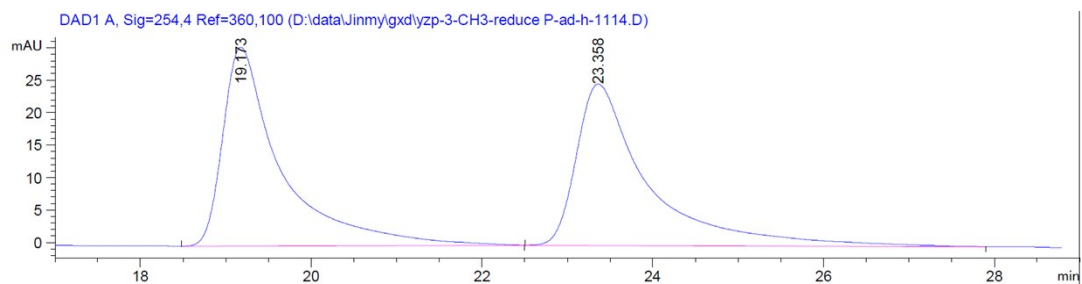

Signal 1: DAD1 A, Sig=254,4 Ref=360,100

| Peak # | RetTime [min] | Type | Width [min] | Area [mAU*s] | Height [mAU] | Area %  |
|--------|---------------|------|-------------|--------------|--------------|---------|
| 1      | 19.173        | BB   | 0.6725      | 1455.57947   | 30.62736     | 50.1816 |
| 2      | 23.358        | BB   | 0.8205      | 1445.04675   | 24.84810     | 49.8184 |

Totals : 2900.62622 55.47547

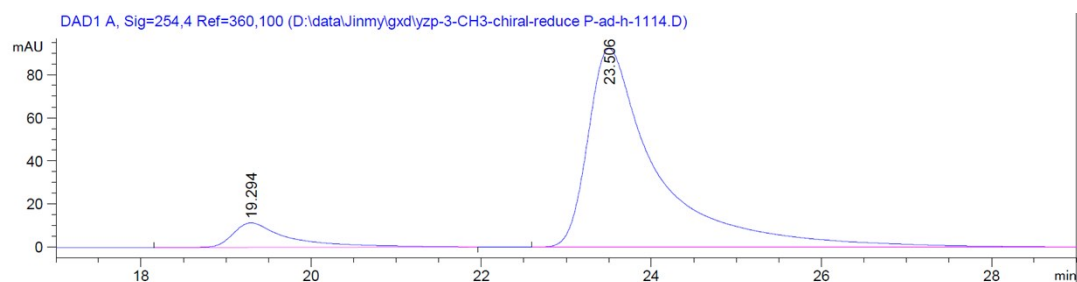

Signal 1: DAD1 A, Sig=254,4 Ref=360,100

| Peak # | RetTime [min] | Type | Width [min] | Area [mAU*s] | Height [mAU] | Area %  |
|--------|---------------|------|-------------|--------------|--------------|---------|
| 1      | 19.294        | BB   | 0.6499      | 524.17285    | 11.41032     | 9.0270  |
| 2      | 23.506        | BB   | 0.8016      | 5282.54395   | 92.31250     | 90.9730 |

Totals : 5806.71680 103.72282

### Ethyl phenyl(1-(*o*-tolyl)vinyl)phosphinate (3da)

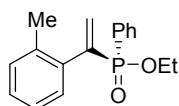

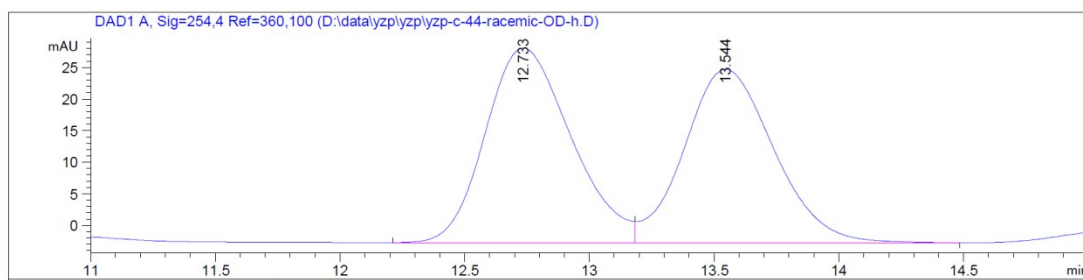

Signal 1: DAD1 A, Sig=254,4 Ref=360,100

| Peak # | RetTime [min] | Type | Width [min] | Area [mAU*s] | Height [mAU] | Area %  |
|--------|---------------|------|-------------|--------------|--------------|---------|
| 1      | 12.733        | BV   | 0.3705      | 736.65143    | 30.85783     | 51.7973 |
| 2      | 13.544        | VB   | 0.3871      | 685.52838    | 27.47429     | 48.2027 |

Totals : 1422.17981 58.33212

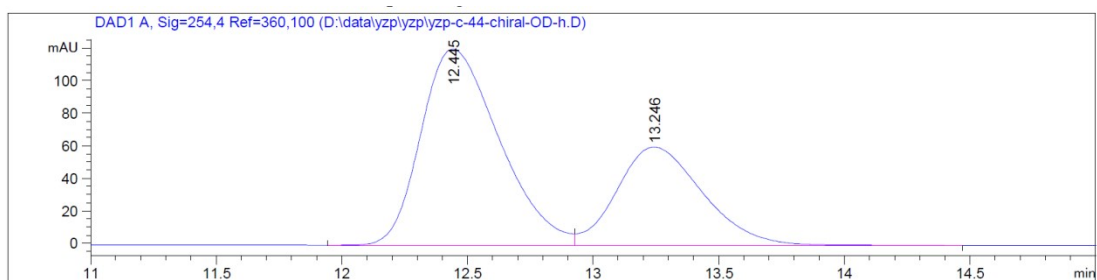

Signal 1: DAD1 A, Sig=254,4 Ref=360,100

| Peak # | RetTime [min] | Type | Width [min] | Area [mAU*s] | Height [mAU] | Area %  |
|--------|---------------|------|-------------|--------------|--------------|---------|
| 1      | 12.445        | BV   | 0.3372      | 2618.21777   | 120.62339    | 64.5660 |
| 2      | 13.246        | VB   | 0.3650      | 1436.88525   | 60.52047     | 35.4340 |

Totals : 4055.10303 181.14386

### Ethyl (1-(4-ethylphenyl)vinyl)(phenyl)phosphinate (3ea)

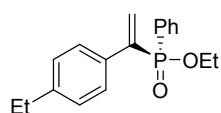

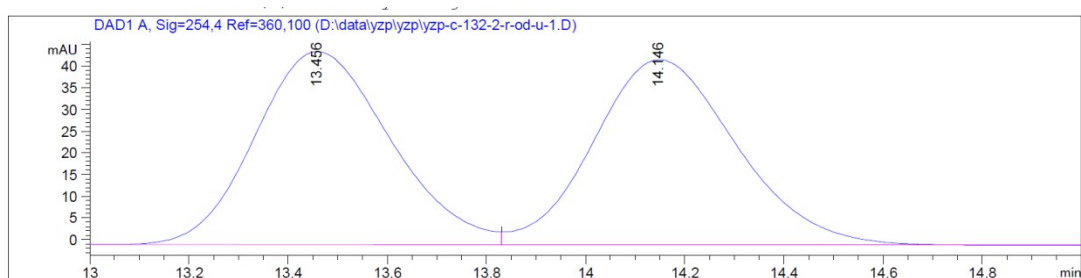

Signal 1: DAD1 A, Sig=254,4 Ref=360,100

| Peak # | RetTime [min] | Type | Width [min] | Area [mAU*s] | Height [mAU] | Area %  |
|--------|---------------|------|-------------|--------------|--------------|---------|
| 1      | 13.456        | BV   | 0.2957      | 848.08154    | 44.63076     | 49.6177 |
| 2      | 14.146        | VB   | 0.3108      | 861.14893    | 42.79587     | 50.3823 |

Totals : 1709.23047 87.42663

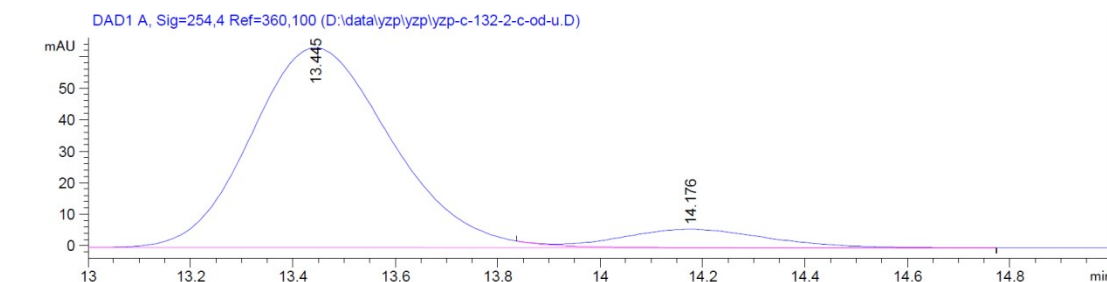

Signal 1: DAD1 A, Sig=254,4 Ref=360,100

| Peak # | RetTime [min] | Type | Width [min] | Area [mAU*s] | Height [mAU] | Area %  |
|--------|---------------|------|-------------|--------------|--------------|---------|
| 1      | 13.445        | BV R | 0.2952      | 1213.60986   | 63.44499     | 91.3723 |
| 2      | 14.176        | VB E | 0.2987      | 114.59372    | 5.84656      | 8.6277  |

Totals : 1328.20358 69.29155

### Ethyl (1-(4-(*tert*-butyl)phenyl)vinyl)(phenyl)phosphinate (3fa)

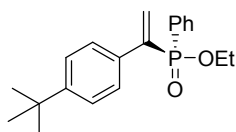



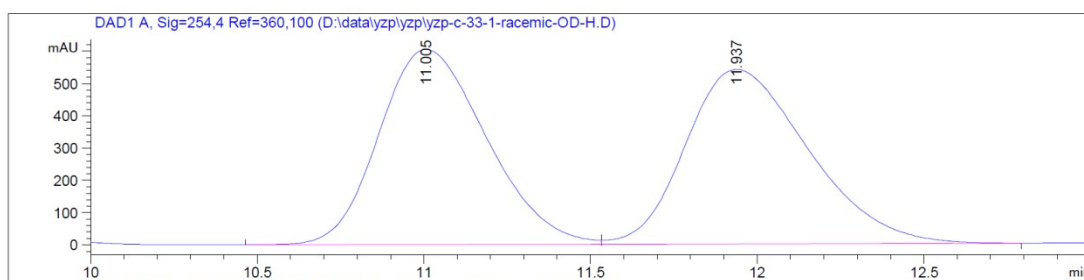

| Peak # | RetTime [min] | Type | Width [min] | Area [mAU*s] | Height [mAU] | Area %  |
|--------|---------------|------|-------------|--------------|--------------|---------|
| 1      | 11.005        | BV   | 0.3510      | 1.35163e4    | 604.23236    | 49.4166 |
| 2      | 11.937        | VB   | 0.3967      | 1.38354e4    | 540.29620    | 50.5834 |

Totals : 2.73517e4 1144.52856

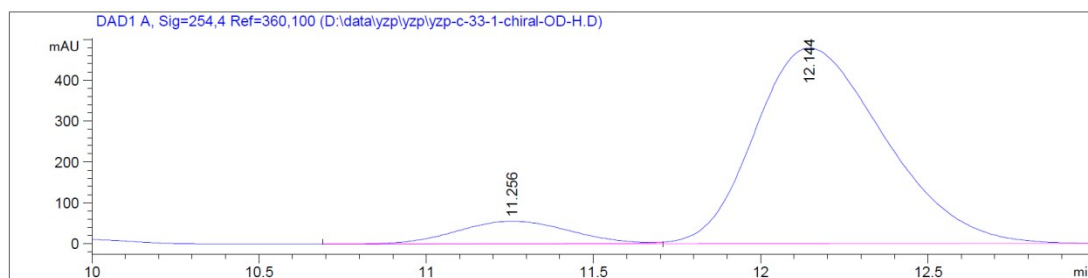

Signal 1: DAD1 A, Sig=254,4 Ref=360,100

| Peak # | RetTime [min] | Type | Width [min] | Area [mAU*s] | Height [mAU] | Area %  |
|--------|---------------|------|-------------|--------------|--------------|---------|
| 1      | 11.256        | BV E | 0.3731      | 1313.57458   | 55.69807     | 9.2287  |
| 2      | 12.144        | VB R | 0.4210      | 1.29200e4    | 478.50732    | 90.7713 |

Totals : 1.42336e4 534.20539

### Ethyl (1-(4-pentylphenyl)vinyl)(phenyl)phosphinate (3ga)

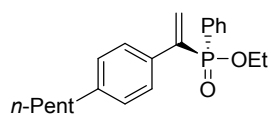



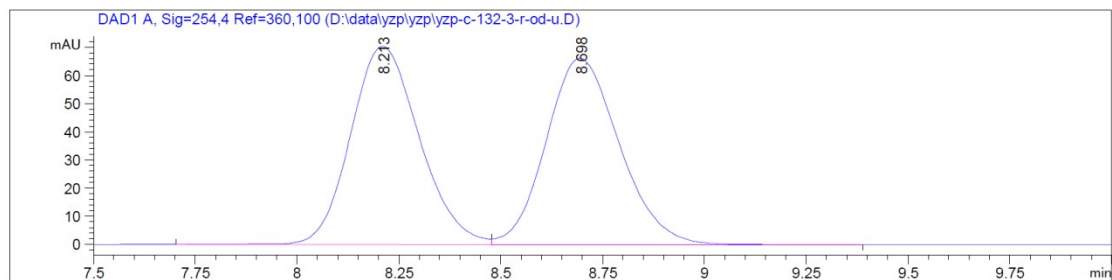

Signal 1: DAD1 A, Sig=254,4 Ref=360,100

| Peak # | RetTime [min] | Type | Width [min] | Area [mAU*s] | Height [mAU] | Area %  |
|--------|---------------|------|-------------|--------------|--------------|---------|
| 1      | 8.213         | BV   | 0.1809      | 827.99847    | 70.53882     | 49.8606 |
| 2      | 8.698         | VB   | 0.1944      | 832.62897    | 66.32990     | 50.1394 |

Totals : 1660.62744 136.86871

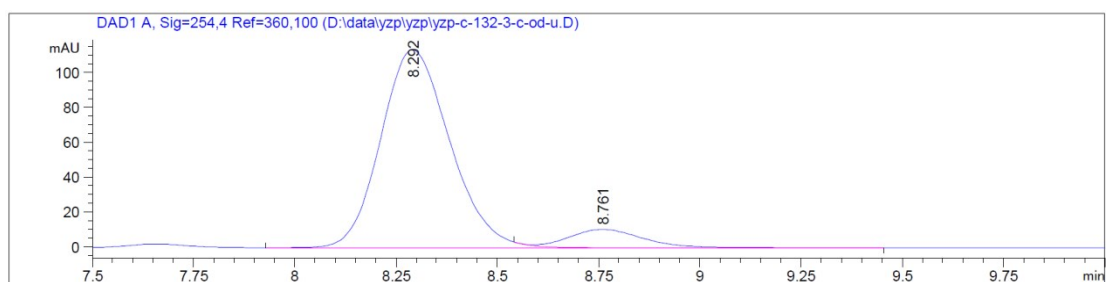

Signal 1: DAD1 A, Sig=254,4 Ref=360,100

| Peak # | RetTime [min] | Type | Width [min] | Area [mAU*s] | Height [mAU] | Area %  |
|--------|---------------|------|-------------|--------------|--------------|---------|
| 1      | 8.292         | BV R | 0.1823      | 1349.61511   | 113.81870    | 90.9758 |
| 2      | 8.761         | VB E | 0.1961      | 133.87355    | 10.54477     | 9.0242  |

Totals : 1483.48866 124.36347

### Ethyl (1-(4-fluorophenyl)vinyl)(phenyl)phosphinate (3ha)

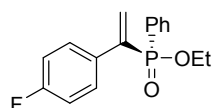

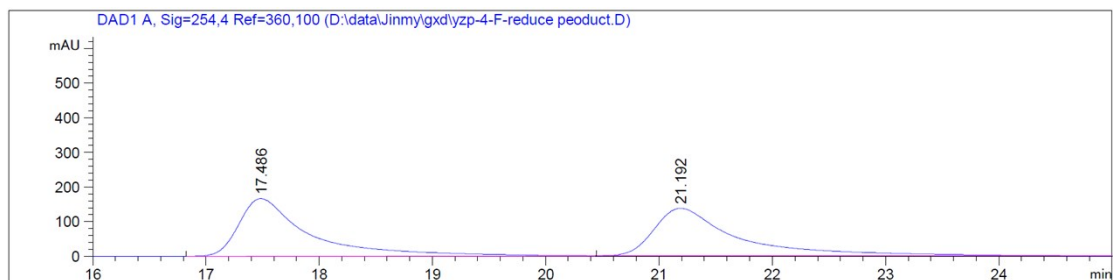

Signal 1: DAD1 A, Sig=254,4 Ref=360,100

| Peak # | RetTime [min] | Type | Width [min] | Area [mAU*s] | Height [mAU] | Area %  |
|--------|---------------|------|-------------|--------------|--------------|---------|
| 1      | 17.486        | BB   | 0.6041      | 7085.03564   | 165.96121    | 50.0418 |
| 2      | 21.192        | BBA  | 0.7303      | 7073.19629   | 137.01465    | 49.9582 |

Totals : 1.41582e4 302.97586

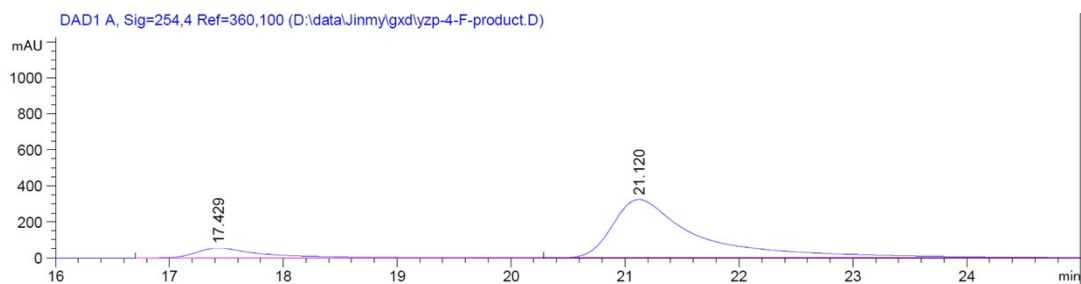

Signal 1: DAD1 A, Sig=254,4 Ref=360,100

| Peak # | RetTime [min] | Type | Width [min] | Area [mAU*s] | Height [mAU] | Area %  |
|--------|---------------|------|-------------|--------------|--------------|---------|
| 1      | 17.429        | BB   | 0.5972      | 2296.09277   | 54.53732     | 11.8369 |
| 2      | 21.120        | BBA  | 0.7435      | 1.71017e4    | 324.16965    | 88.1631 |

Totals : 1.93978e4 378.70697

### Ethyl (1-(4-chlorophenyl)vinyl)(phenyl)phosphinate (3ia)

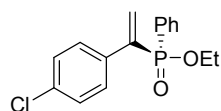

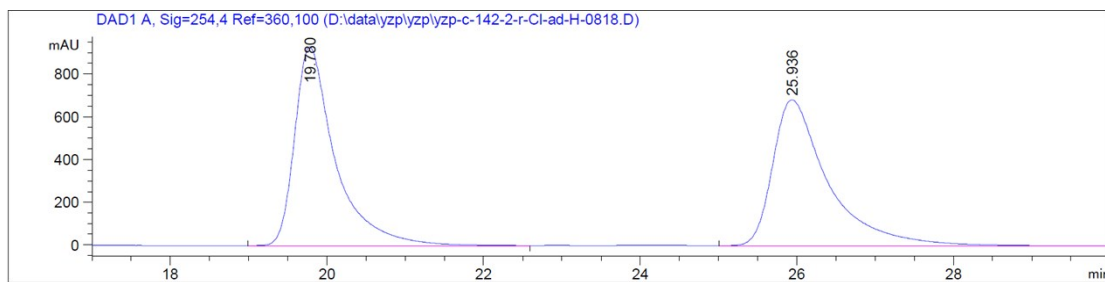

Signal 1: DAD1 A, Sig=254,4 Ref=360,100

| Peak # | RetTime [min] | Type | Width [min] | Area [mAU*s] | Height [mAU] | Area %  |
|--------|---------------|------|-------------|--------------|--------------|---------|
| 1      | 19.780        | BB   | 0.5283      | 3.35288e4    | 930.75446    | 49.9538 |
| 2      | 25.936        | BBA  | 0.7156      | 3.35908e4    | 683.27417    | 50.0462 |

Totals : 6.71197e4 1614.02863

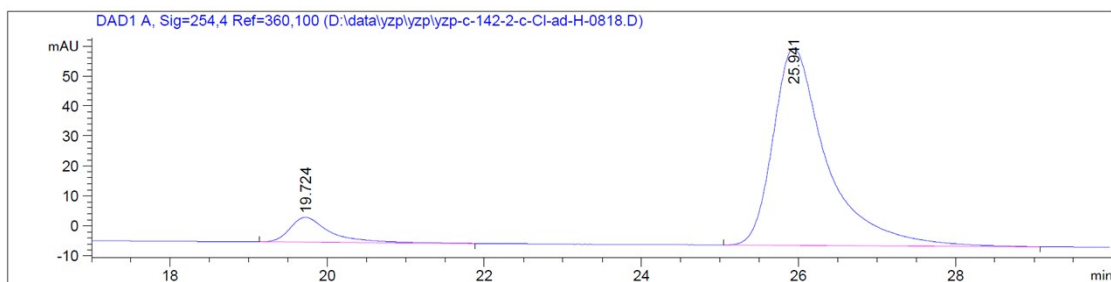

Signal 1: DAD1 A, Sig=254,4 Ref=360,100

| Peak # | RetTime [min] | Type | Width [min] | Area [mAU*s] | Height [mAU] | Area %  |
|--------|---------------|------|-------------|--------------|--------------|---------|
| 1      | 19.724        | BB   | 0.5084      | 294.05746    | 8.27934      | 8.5991  |
| 2      | 25.941        | BB   | 0.6977      | 3125.58203   | 65.86158     | 91.4009 |

Totals : 3419.63950 74.14091

### Ethyl (1-(4-bromophenyl)vinyl)(phenyl)phosphinate (3ja)

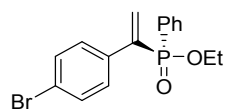

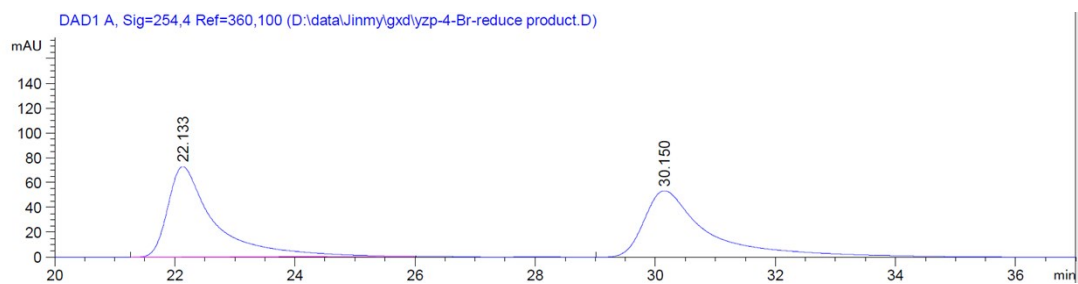

Signal 1: DAD1 A, Sig=254,4 Ref=360,100

| Peak # | RetTime [min] | Type | Width [min] | Area [mAU*s] | Height [mAU] | Area %  |
|--------|---------------|------|-------------|--------------|--------------|---------|
| 1      | 22.133        | BB   | 0.7671      | 3936.78735   | 73.00545     | 49.5685 |
| 2      | 30.150        | BB   | 1.0514      | 4005.33057   | 53.62398     | 50.4315 |

Totals : 7942.11792 126.62943

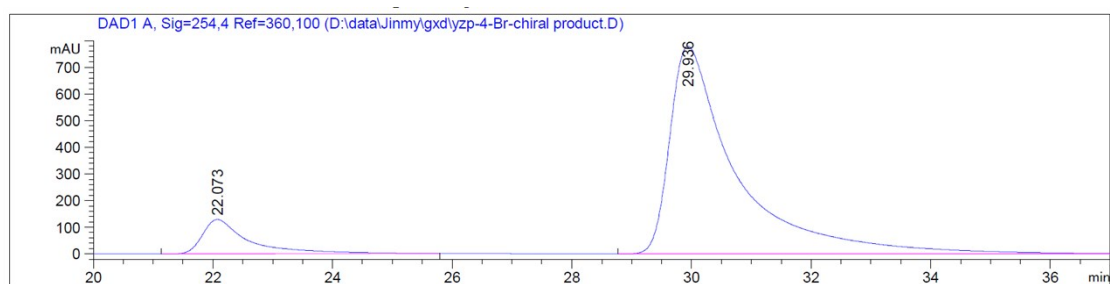

Signal 1: DAD1 A, Sig=254,4 Ref=360,100

| Peak # | RetTime [min] | Type | Width [min] | Area [mAU*s] | Height [mAU] | Area %  |
|--------|---------------|------|-------------|--------------|--------------|---------|
| 1      | 22.073        | BB   | 0.7676      | 6949.57031   | 128.77031    | 10.2714 |
| 2      | 29.936        | BB   | 1.0923      | 6.07102e4    | 779.75720    | 89.7286 |

Totals : 6.76598e4 908.52751

### Ethyl phenyl(1-(4-(trifluoromethyl)phenyl)vinyl)phosphinate (3ka)

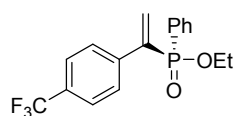

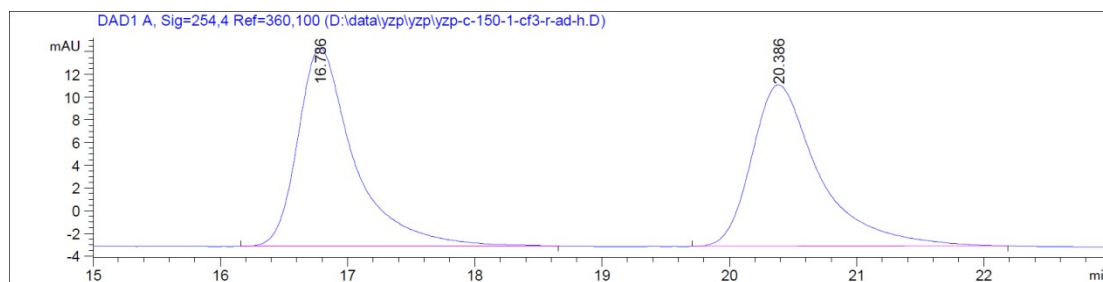

Signal 1: DAD1 A, Sig=254,4 Ref=360,100

| Peak # | RetTime [min] | Type | Width [min] | Area [mAU*s] | Height [mAU] | Area %  |
|--------|---------------|------|-------------|--------------|--------------|---------|
| 1      | 16.786        | BB   | 0.4495      | 539.09833    | 17.49617     | 50.6946 |
| 2      | 20.386        | BB   | 0.5484      | 524.32599    | 14.21295     | 49.3054 |

Totals : 1063.42432 31.70912

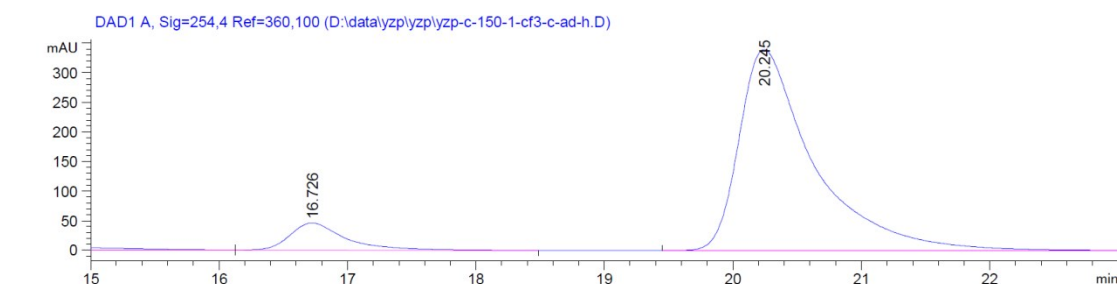

Signal 1: DAD1 A, Sig=254,4 Ref=360,100

| Peak # | RetTime [min] | Type | Width [min] | Area [mAU*s] | Height [mAU] | Area %  |
|--------|---------------|------|-------------|--------------|--------------|---------|
| 1      | 16.726        | BB   | 0.4421      | 1374.91882   | 45.82354     | 9.1003  |
| 2      | 20.245        | BB   | 0.5856      | 1.37336e4    | 339.73163    | 90.8997 |

Totals : 1.51086e4 385.55517

### Ethyl (1-(4-methoxyphenyl)vinyl)(phenyl)phosphinate (3la)

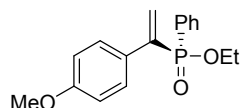

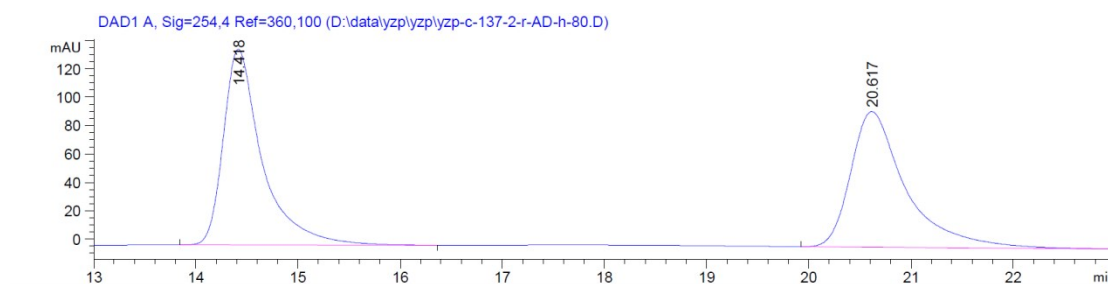

Signal 1: DAD1 A, Sig=254,4 Ref=360,100

| Peak # | RetTime [min] | Type | Width [min] | Area [mAU*s] | Height [mAU] | Area %  |
|--------|---------------|------|-------------|--------------|--------------|---------|
| 1      | 14.418        | BB   | 0.3871      | 3628.31055   | 137.82220    | 50.2696 |
| 2      | 20.617        | BBA  | 0.5522      | 3589.38574   | 95.55950     | 49.7304 |

Totals : 7217.69629 233.38171

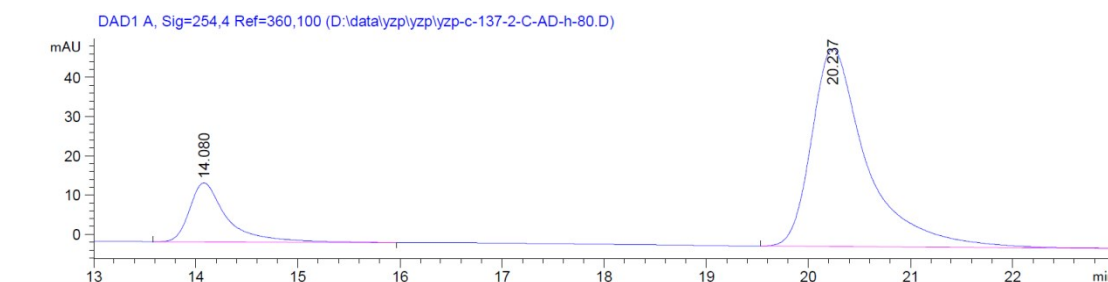

Signal 1: DAD1 A, Sig=254,4 Ref=360,100

| Peak # | RetTime [min] | Type | Width [min] | Area [mAU*s] | Height [mAU] | Area %  |
|--------|---------------|------|-------------|--------------|--------------|---------|
| 1      | 14.080        | BB   | 0.3740      | 384.34708    | 15.04927     | 16.8566 |
| 2      | 20.237        | BB   | 0.5545      | 1895.75647   | 50.43964     | 83.1434 |

Totals : 2280.10355 65.48891

### Ethyl (1-(3-methoxyphenyl)vinyl)(phenyl)phosphinate (3ma)

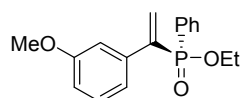



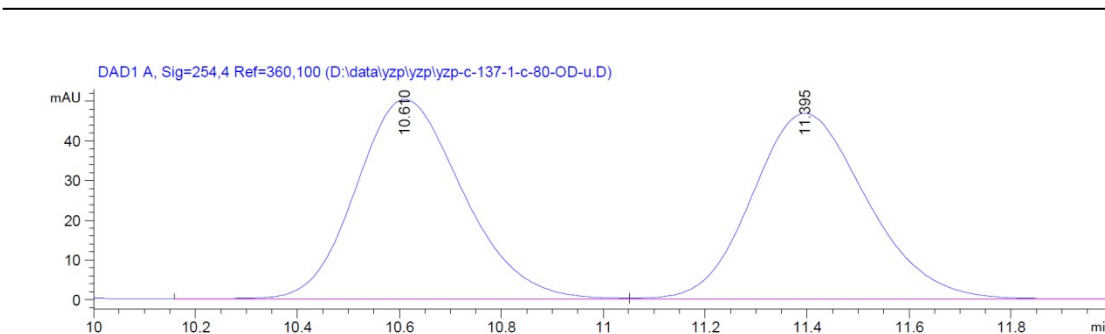

Signal 1: DAD1 A, Sig=254,4 Ref=360,100

| Peak # | RetTime [min] | Type | Width [min] | Area [mAU*s] | Height [mAU] | Area %  |
|--------|---------------|------|-------------|--------------|--------------|---------|
| 1      | 10.610        | BV   | 0.2257      | 730.76105    | 50.23415     | 50.0569 |
| 2      | 11.395        | VB   | 0.2421      | 729.09918    | 46.70588     | 49.9431 |

Totals : 1459.86023 96.94004

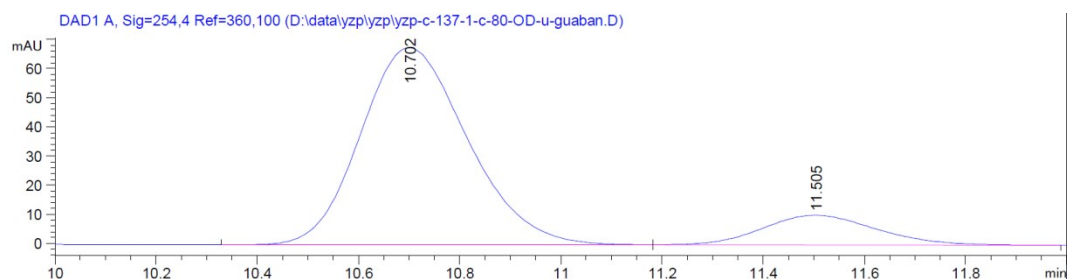

Signal 1: DAD1 A, Sig=254,4 Ref=360,100

| Peak # | RetTime [min] | Type | Width [min] | Area [mAU*s] | Height [mAU] | Area %  |
|--------|---------------|------|-------------|--------------|--------------|---------|
| 1      | 10.702        | BB   | 0.2294      | 994.26141    | 67.68888     | 86.2171 |
| 2      | 11.505        | BB   | 0.2406      | 158.94597    | 10.15432     | 13.7829 |

Totals : 1153.20738 77.84320

### Ethyl (1-(3-chlorophenyl)vinyl)(phenyl)phosphinate (3na)

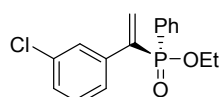

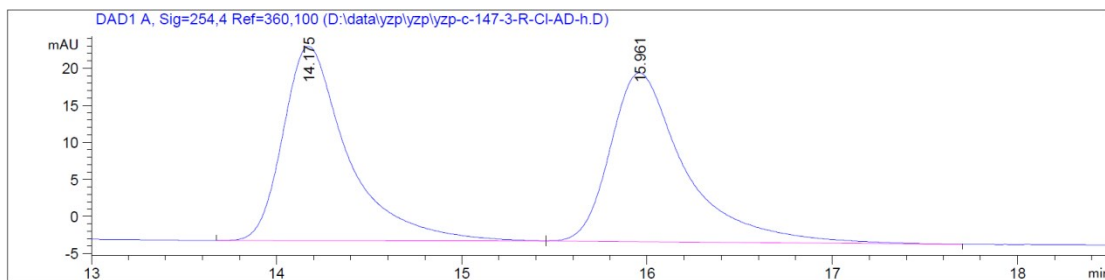

Signal 1: DAD1 A, Sig=254,4 Ref=360,100

| Peak # | RetTime [min] | Type | Width [min] | Area [mAU*s] | Height [mAU] | Area %  |
|--------|---------------|------|-------------|--------------|--------------|---------|
| 1      | 14.175        | BB   | 0.3578      | 637.51459    | 26.20414     | 49.9793 |
| 2      | 15.961        | BB   | 0.4132      | 638.04175    | 22.74858     | 50.0207 |

Totals : 1275.55634 48.95271

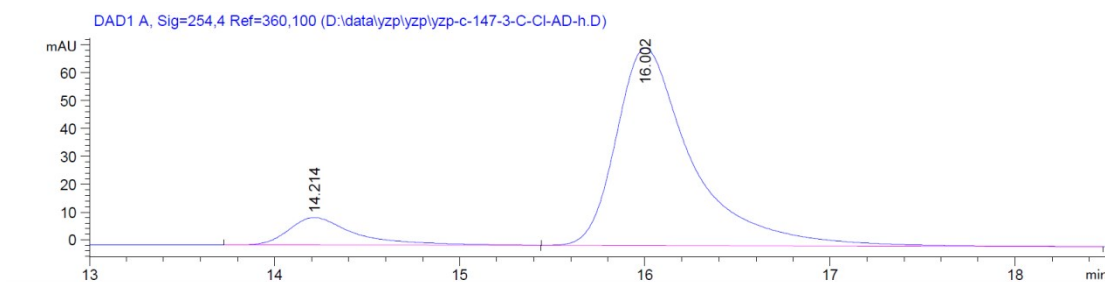

Signal 1: DAD1 A, Sig=254,4 Ref=360,100

| Peak # | RetTime [min] | Type | Width [min] | Area [mAU*s] | Height [mAU] | Area %  |
|--------|---------------|------|-------------|--------------|--------------|---------|
| 1      | 14.214        | BB   | 0.3644      | 244.77248    | 9.83293      | 10.8374 |
| 2      | 16.002        | BB   | 0.4179      | 2013.81152   | 70.79815     | 89.1626 |

Totals : 2258.58400 80.63108

### Ethyl phenyl(1-(thiophen-2-yl)vinyl)phosphinate (3oa)

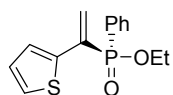



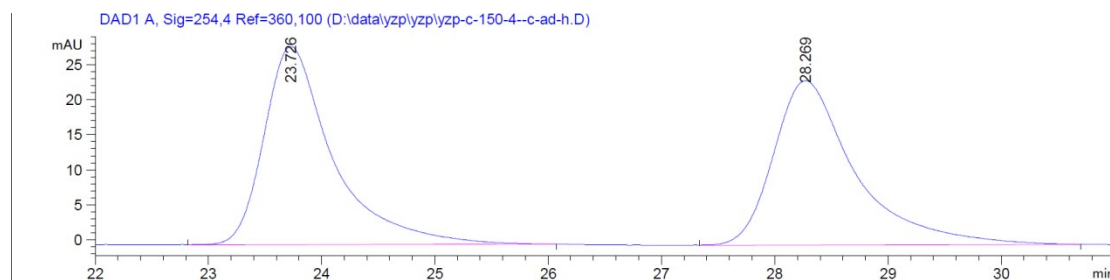

Signal 1: DAD1 A, Sig=254,4 Ref=360,100

| Peak # | RetTime [min] | Type | Width [min] | Area [mAU*s] | Height [mAU] | Area %  |
|--------|---------------|------|-------------|--------------|--------------|---------|
| 1      | 23.726        | BB   | 0.6240      | 1199.77063   | 28.33216     | 50.4731 |
| 2      | 28.269        | BB   | 0.7346      | 1177.27844   | 23.49385     | 49.5269 |

Totals : 2377.04907 51.82601

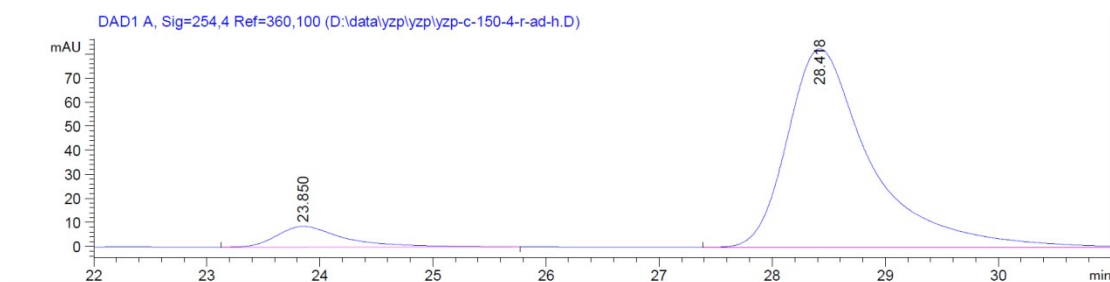

Signal 1: DAD1 A, Sig=254,4 Ref=360,100

| Peak # | RetTime [min] | Type | Width [min] | Area [mAU*s] | Height [mAU] | Area %  |
|--------|---------------|------|-------------|--------------|--------------|---------|
| 1      | 23.850        | BB   | 0.6010      | 362.60214    | 8.61544      | 7.8429  |
| 2      | 28.418        | BB   | 0.7536      | 4260.73926   | 82.62840     | 92.1571 |

Totals : 4623.34140 91.24384

### Ethyl phenyl(1-(pyridin-3-yl)vinyl)phosphinate (3pa)

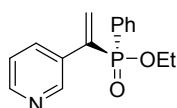

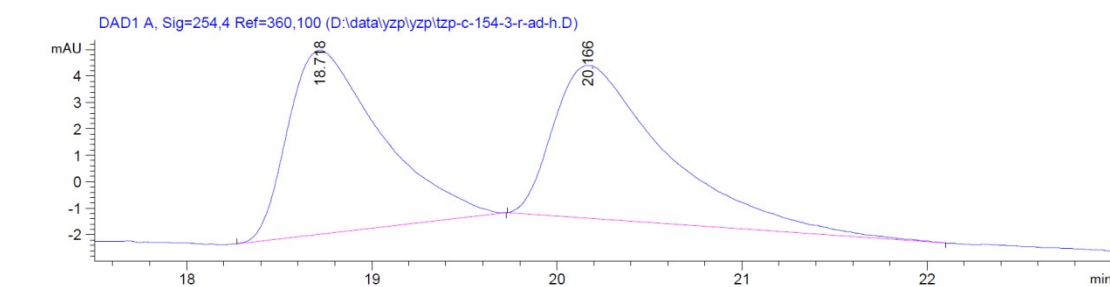

Signal 1: DAD1 A, Sig=254,4 Ref=360,100

| Peak # | RetTime [min] | Type | Width [min] | Area [mAU*s] | Height [mAU] | Area %  |
|--------|---------------|------|-------------|--------------|--------------|---------|
| 1      | 18.718        | BB   | 0.4868      | 242.45108    | 6.95281      | 49.7336 |
| 2      | 20.166        | BB   | 0.5886      | 245.04849    | 5.77976      | 50.2664 |

Totals : 487.49957 12.73257

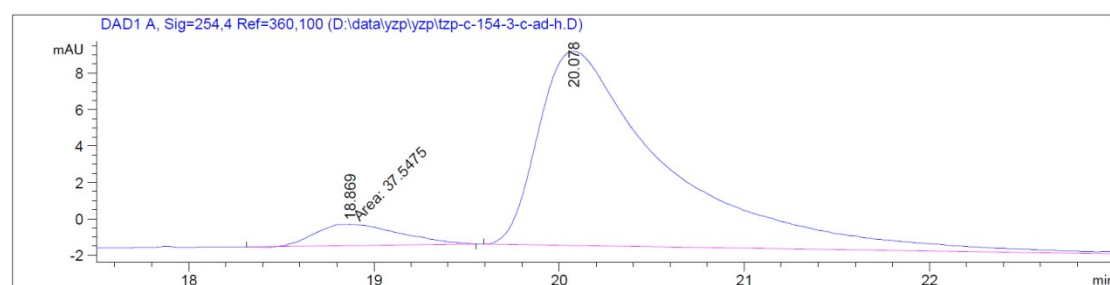

Signal 1: DAD1 A, Sig=254,4 Ref=360,100

| Peak # | RetTime [min] | Type | Width [min] | Area [mAU*s] | Height [mAU] | Area %  |
|--------|---------------|------|-------------|--------------|--------------|---------|
| 1      | 18.869        | MM   | 0.5303      | 37.54748     | 1.18003      | 6.7609  |
| 2      | 20.078        | BB   | 0.6762      | 517.81714    | 10.67050     | 93.2391 |

Totals : 555.36462 11.85053

### Ethyl (Z)-(1,2-diphenylvinyl)(phenyl)phosphinate (3qa)

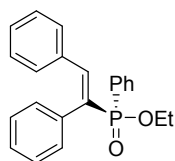

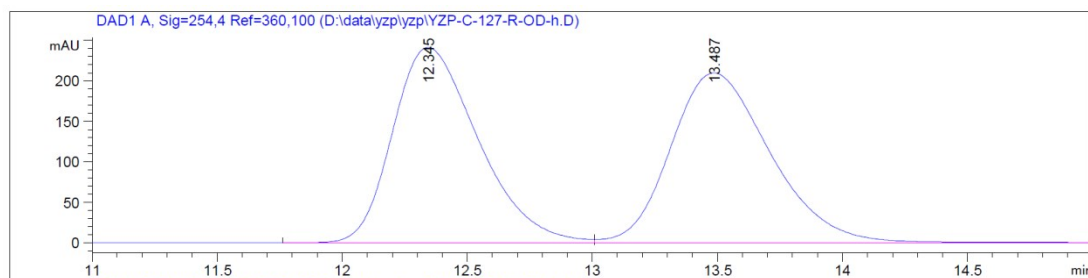

Signal 1: DAD1 A, Sig=254,4 Ref=360,100

| Peak # | RetTime [min] | Type | Width [min] | Area [mAU*s] | Height [mAU] | Area %  |
|--------|---------------|------|-------------|--------------|--------------|---------|
| 1      | 12.345        | BV   | 0.3669      | 5725.15137   | 241.20590    | 49.6995 |
| 2      | 13.487        | VB   | 0.4265      | 5794.37842   | 209.63976    | 50.3005 |

Totals : 1.15195e4 450.84566

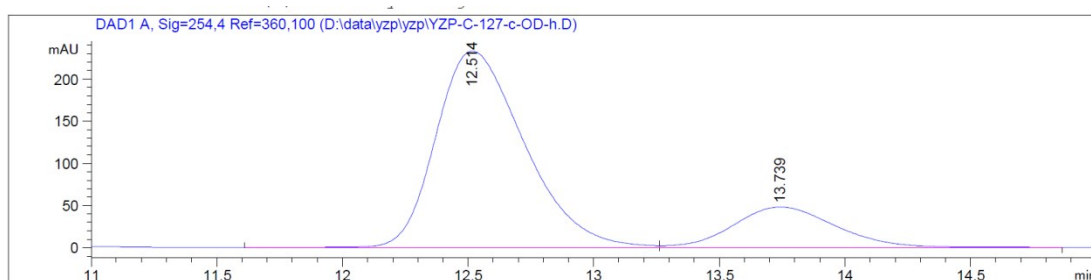

Signal 1: DAD1 A, Sig=254,4 Ref=360,100

| Peak # | RetTime [min] | Type | Width [min] | Area [mAU*s] | Height [mAU] | Area %  |
|--------|---------------|------|-------------|--------------|--------------|---------|
| 1      | 12.514        | BV   | 0.3776      | 5703.88672   | 232.99278    | 80.8349 |
| 2      | 13.739        | VB   | 0.4371      | 1352.33093   | 47.93449     | 19.1651 |

Totals : 7056.21765 280.92727

### Ethyl phenyl(4-phenylbut-1-en-2-yl)phosphinate (3ra)

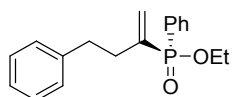

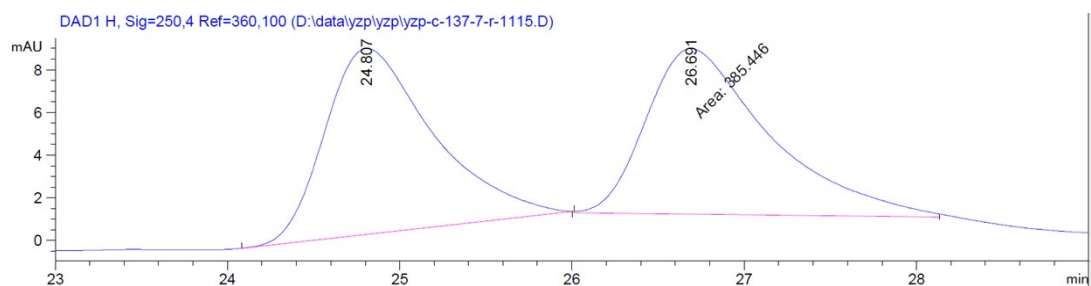

Signal 8: DAD1 H, Sig=250,4 Ref=360,100

| Peak # | RetTime [min] | Type | Width [min] | Area [mAU*s] | Height [mAU] | Area %  |
|--------|---------------|------|-------------|--------------|--------------|---------|
| 1      | 24.807        | BB   | 0.6532      | 379.97043    | 8.70611      | 49.6423 |
| 2      | 26.691        | MM   | 0.8276      | 385.44553    | 7.76210      | 50.3577 |

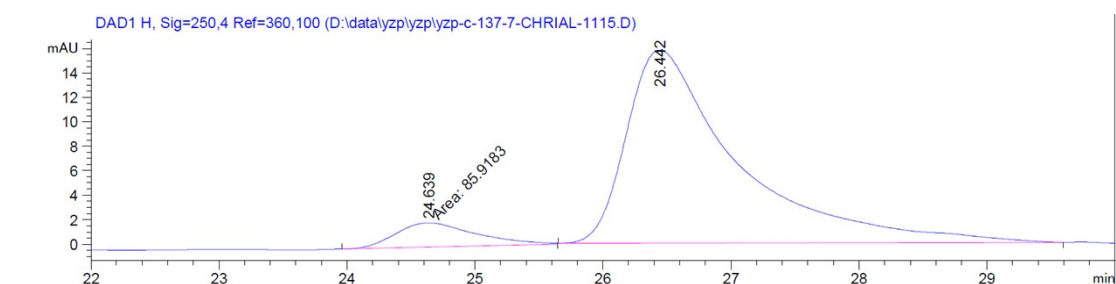

Signal 8: DAD1 H, Sig=250,4 Ref=360,100

| Peak # | RetTime [min] | Type | Width [min] | Area [mAU*s] | Height [mAU] | Area %  |
|--------|---------------|------|-------------|--------------|--------------|---------|
| 1      | 24.639        | MM   | 0.7256      | 85.91833     | 1.97359      | 8.2975  |
| 2      | 26.442        | BB   | 0.8468      | 949.55420    | 15.80893     | 91.7025 |

Totals : 1035.47253 17.78252

### Ethyl (1-(cyclohex-1-en-1-yl)vinyl)(phenyl)phosphinate (3sa)

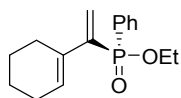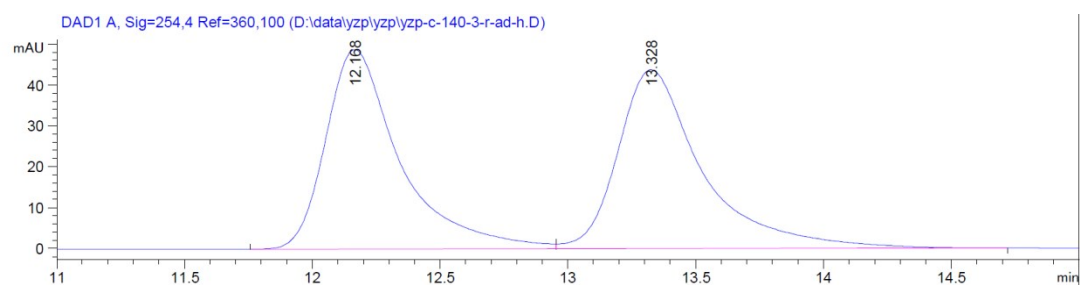

Signal 1: DAD1 A, Sig=254,4 Ref=360,100

| Peak # | RetTime [min] | Type | Width [min] | Area [mAU*s] | Height [mAU] | Area %  |
|--------|---------------|------|-------------|--------------|--------------|---------|
| 1      | 12.168        | BV   | 0.2981      | 987.60193    | 48.80626     | 49.4378 |
| 2      | 13.328        | VB   | 0.3393      | 1010.06213   | 43.75435     | 50.5622 |

Totals : 1997.66406 92.56062

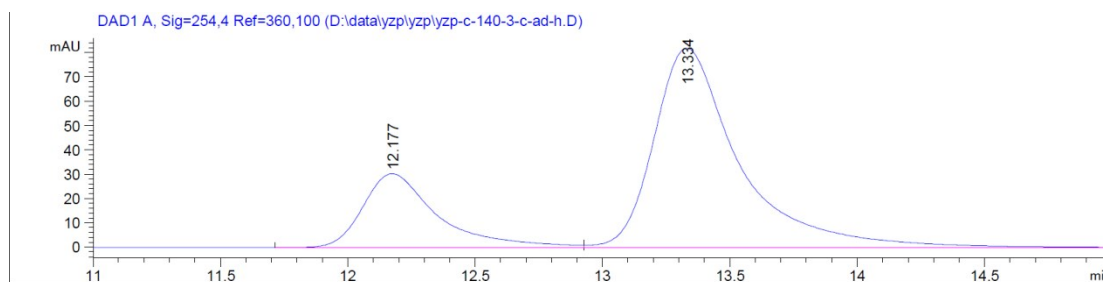

Signal 1: DAD1 A, Sig=254,4 Ref=360,100

| Peak # | RetTime [min] | Type | Width [min] | Area [mAU*s] | Height [mAU] | Area %  |
|--------|---------------|------|-------------|--------------|--------------|---------|
| 1      | 12.177        | BV   | 0.3024      | 620.33344    | 30.36318     | 24.4034 |
| 2      | 13.334        | VB   | 0.3431      | 1921.66394   | 82.09179     | 75.5966 |

Totals : 2541.99738 112.45497

### Ethyl dec-1-en-5-yn-2-yl(phenyl)phosphinate (3ta)

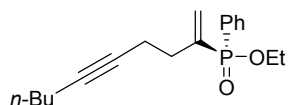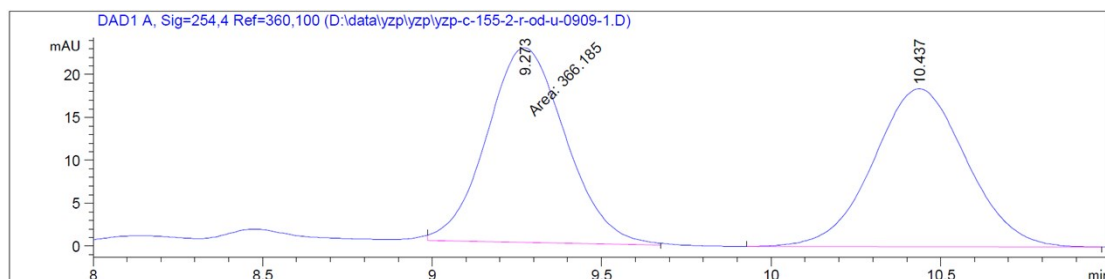

Signal 1: DAD1 A, Sig=254,4 Ref=360,100

| Peak # | RetTime [min] | Type | Width [min] | Area [mAU*s] | Height [mAU] | Area %  |
|--------|---------------|------|-------------|--------------|--------------|---------|
| 1      | 9.273         | FM   | 0.2693      | 366.18530    | 22.66425     | 50.9785 |
| 2      | 10.437        | BB   | 0.2954      | 352.12766    | 18.38955     | 49.0215 |

Totals : 718.31296 41.05380

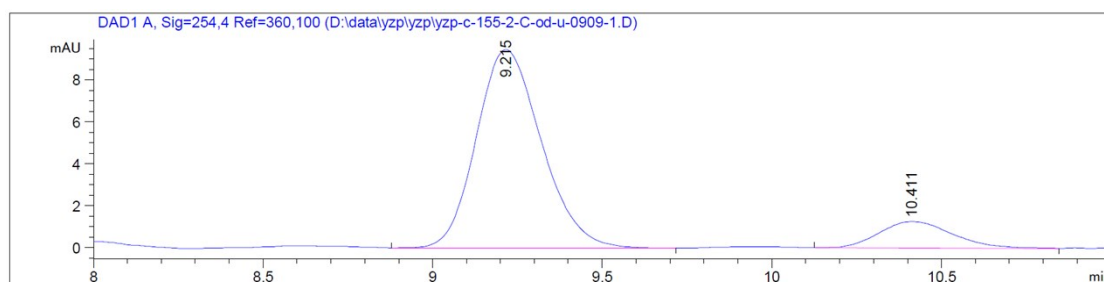

Signal 1: DAD1 A, Sig=254,4 Ref=360,100

| Peak # | RetTime [min] | Type | Width [min] | Area [mAU*s] | Height [mAU] | Area %  |
|--------|---------------|------|-------------|--------------|--------------|---------|
| 1      | 9.215         | BB   | 0.2056      | 126.38673    | 9.47484      | 86.9516 |
| 2      | 10.411        | BB   | 0.2295      | 18.96622     | 1.26053      | 13.0484 |

Totals : 145.35295 10.73537

### Methyl phenyl(1-phenylvinyl)phosphinate (3ab)

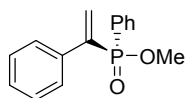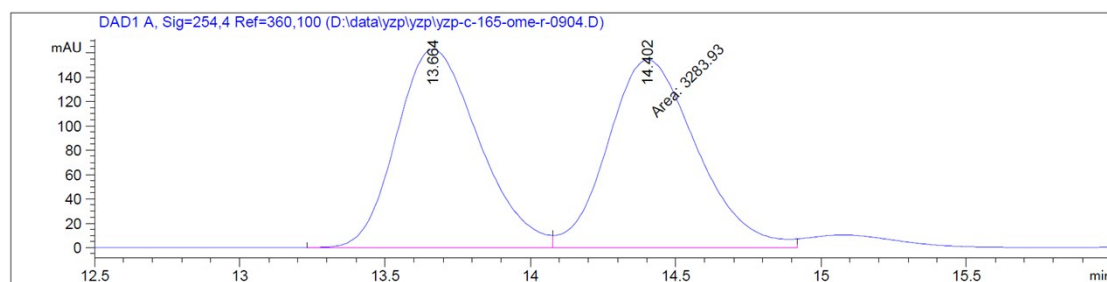



Signal 1: DAD1 A, Sig=254,4 Ref=360,100

| Peak # | RetTime [min] | Type | Width [min] | Area [mAU*s] | Height [mAU] | Area %  |
|--------|---------------|------|-------------|--------------|--------------|---------|
| 1      | 13.664        | BV   | 0.3039      | 3208.71436   | 162.84334    | 49.4208 |
| 2      | 14.402        | MF   | 0.3550      | 3283.92749   | 154.18130    | 50.5792 |

Totals : 6492.64185 317.02464

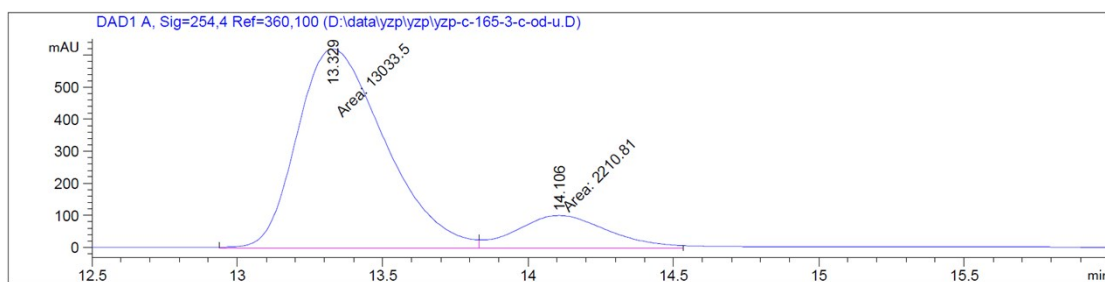

Signal 1: DAD1 A, Sig=254,4 Ref=360,100

| Peak # | RetTime [min] | Type | Width [min] | Area [mAU*s] | Height [mAU] | Area %  |
|--------|---------------|------|-------------|--------------|--------------|---------|
| 1      | 13.329        | MF   | 0.3494      | 1.30335e4    | 621.63159    | 85.4974 |
| 2      | 14.106        | FM   | 0.3633      | 2210.81201   | 101.41106    | 14.5026 |

Totals : 1.52443e4 723.04265

### Propyl phenyl(1-phenylvinyl)phosphinate (3ac)

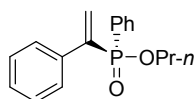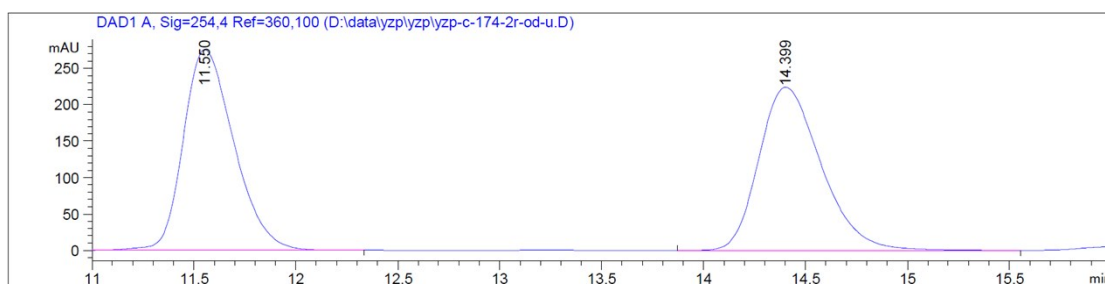

Signal 1: DAD1 A, Sig=254,4 Ref=360,100

| Peak # | RetTime [min] | Type | Width [min] | Area [mAU*s] | Height [mAU] | Area %  |
|--------|---------------|------|-------------|--------------|--------------|---------|
| 1      | 11.550        | BB   | 0.2652      | 4757.17090   | 275.84192    | 49.9634 |
| 2      | 14.399        | BB   | 0.3277      | 4764.14355   | 224.41707    | 50.0366 |

Totals : 9521.31445 500.25899

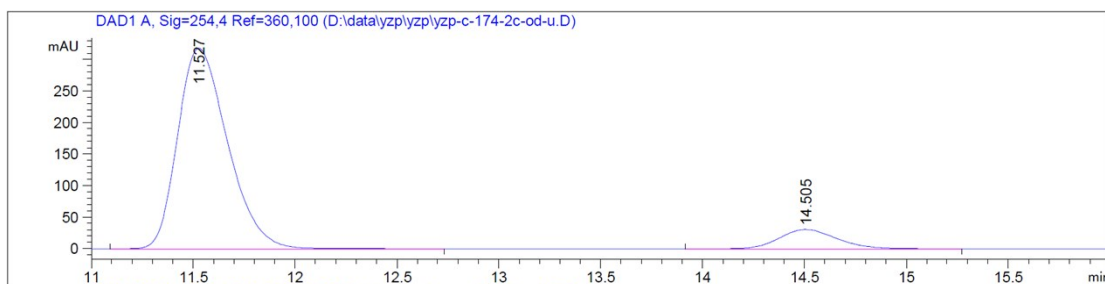

Signal 1: DAD1 A, Sig=254,4 Ref=360,100

| Peak # | RetTime [min] | Type | Width [min] | Area [mAU*s] | Height [mAU] | Area %  |
|--------|---------------|------|-------------|--------------|--------------|---------|
| 1      | 11.527        | BB   | 0.2624      | 5408.20215   | 318.08746    | 89.9798 |
| 2      | 14.505        | BB   | 0.3037      | 602.26172    | 30.58710     | 10.0202 |

Totals : 6010.46387 348.67456

### Isopropyl phenyl(1-phenylvinyl)phosphinate (3ad)

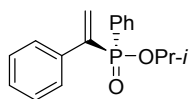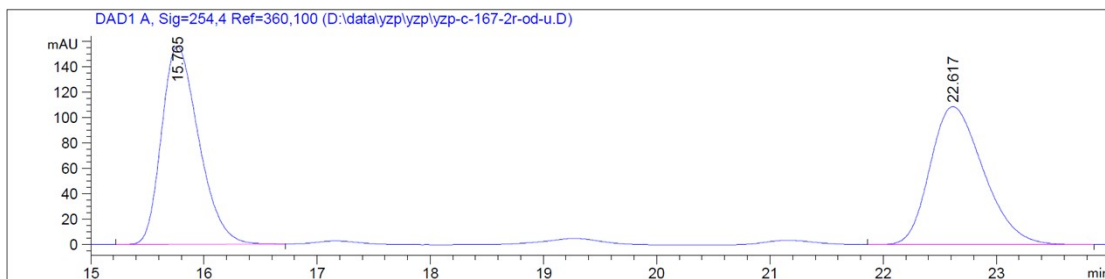



Signal 1: DAD1 A, Sig=254,4 Ref=360,100

| Peak # | RetTime [min] | Type | Width [min] | Area [mAU*s] | Height [mAU] | Area %  |
|--------|---------------|------|-------------|--------------|--------------|---------|
| 1      | 15.765        | BB   | 0.3517      | 3556.52637   | 156.15768    | 49.9463 |
| 2      | 22.617        | BB   | 0.5104      | 3564.17554   | 108.75292    | 50.0537 |

Totals : 7120.70190 264.91061

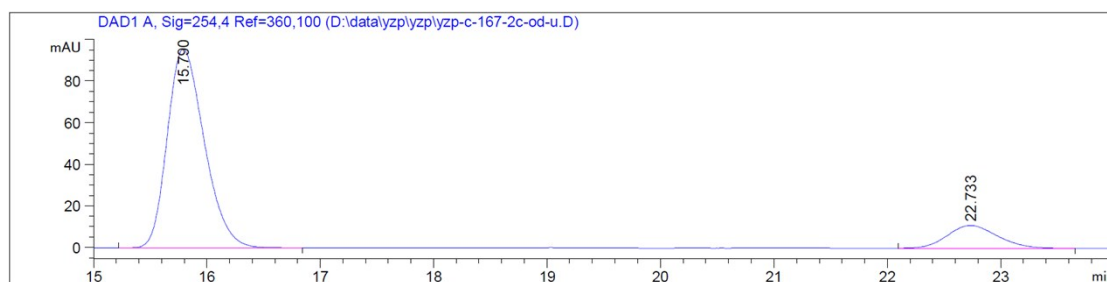

Signal 1: DAD1 A, Sig=254,4 Ref=360,100

| Peak # | RetTime [min] | Type | Width [min] | Area [mAU*s] | Height [mAU] | Area %  |
|--------|---------------|------|-------------|--------------|--------------|---------|
| 1      | 15.790        | BB   | 0.3524      | 2167.35767   | 95.61871     | 86.4514 |
| 2      | 22.733        | BB   | 0.4723      | 339.66675    | 10.99948     | 13.5486 |

Totals : 2507.02441 106.61819

### Ethyl (1-phenylvinyl)(*p*-tolyl)phosphinate (3ae)

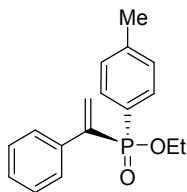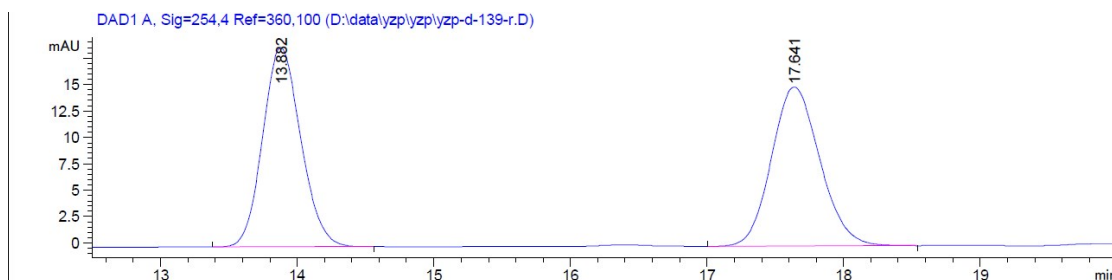

Signal 1: DAD1 A, Sig=254,4 Ref=360,100

| Peak # | RetTime [min] | Type | Width [min] | Area [mAU*s] | Height [mAU] | Area %  |
|--------|---------------|------|-------------|--------------|--------------|---------|
| 1      | 13.882        | BB   | 0.2997      | 365.34946    | 18.88466     | 49.6452 |
| 2      | 17.641        | BB   | 0.3792      | 370.57196    | 15.05156     | 50.3548 |

Totals : 735.92142 33.93622

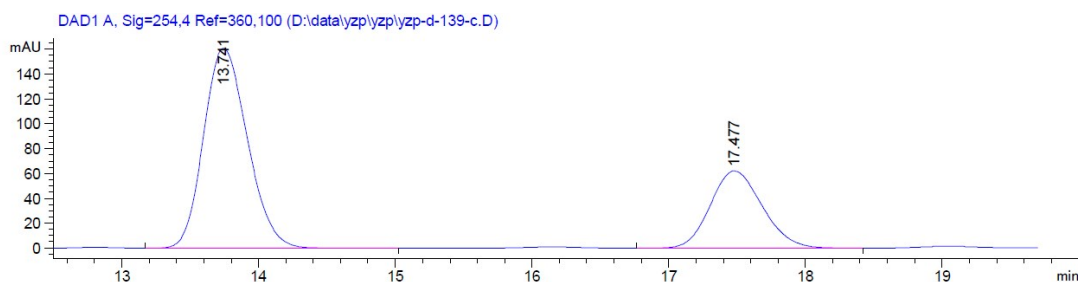

Signal 1: DAD1 A, Sig=254,4 Ref=360,100

| Peak # | RetTime [min] | Type | Width [min] | Area [mAU*s] | Height [mAU] | Area %  |
|--------|---------------|------|-------------|--------------|--------------|---------|
| 1      | 13.741        | BB   | 0.3495      | 3580.47192   | 160.94972    | 68.5631 |
| 2      | 17.477        | BB   | 0.4102      | 1641.68225   | 62.15380     | 31.4369 |

Totals : 5222.15417 223.10352

### Methyl (1-(4-(tert-butyl)phenyl)vinyl)(phenyl)phosphinate (3fb)

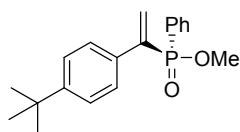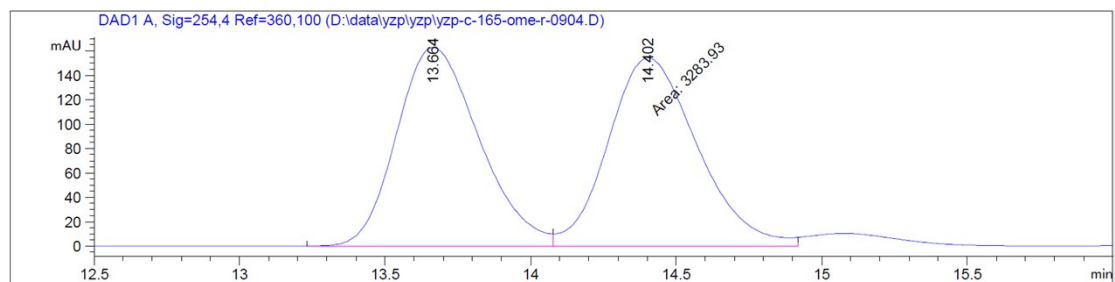

Signal 1: DAD1 A, Sig=254,4 Ref=360,100

| Peak # | RetTime [min] | Type | Width [min] | Area [mAU*s] | Height [mAU] | Area %  |
|--------|---------------|------|-------------|--------------|--------------|---------|
| 1      | 13.664        | BV   | 0.3039      | 3208.71436   | 162.84334    | 49.4208 |
| 2      | 14.402        | MF   | 0.3550      | 3283.92749   | 154.18130    | 50.5792 |

Totals : 6492.64185 317.02464

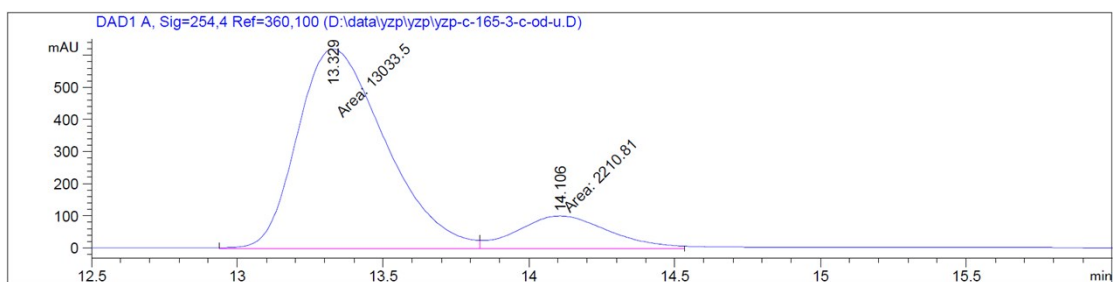

Signal 1: DAD1 A, Sig=254,4 Ref=360,100

| Peak # | RetTime [min] | Type | Width [min] | Area [mAU*s] | Height [mAU] | Area %  |
|--------|---------------|------|-------------|--------------|--------------|---------|
| 1      | 13.329        | MF   | 0.3494      | 1.30335e4    | 621.63159    | 85.4974 |
| 2      | 14.106        | FM   | 0.3633      | 2210.81201   | 101.41106    | 14.5026 |

Totals : 1.52443e4 723.04265

### Methyl(phenyl)(1-phenylvinyl)phosphine oxide (3af)

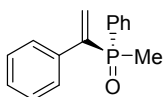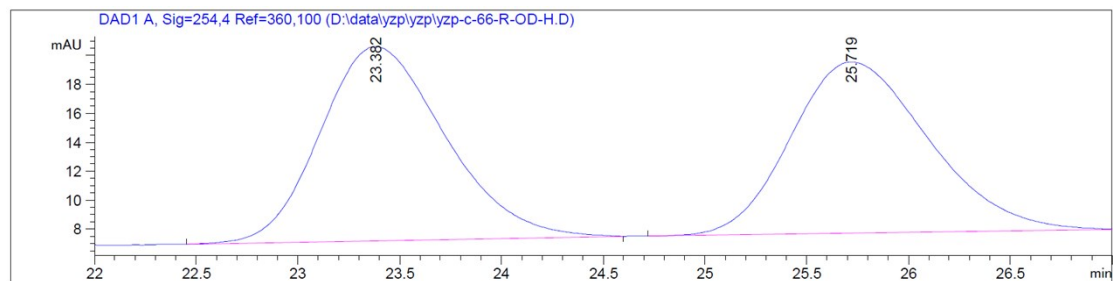

Signal 1: DAD1 A, Sig=254,4 Ref=360,100

| Peak # | RetTime [min] | Type | Width [min] | Area [mAU*s] | Height [mAU] | Area %  |
|--------|---------------|------|-------------|--------------|--------------|---------|
| 1      | 23.382        | BB   | 0.6469      | 572.43549    | 13.44032     | 50.6044 |
| 2      | 25.719        | BB   | 0.7180      | 558.76111    | 11.85214     | 49.3956 |

Totals : 1131.19659 25.29246

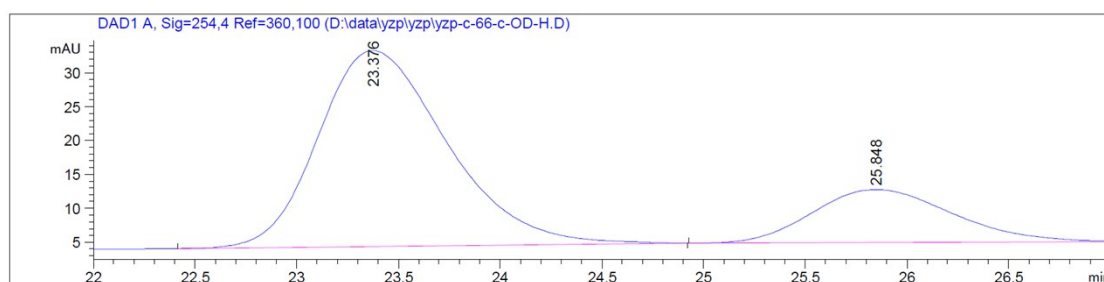

Signal 1: DAD1 A, Sig=254,4 Ref=360,100

| Peak # | RetTime [min] | Type | Width [min] | Area [mAU*s] | Height [mAU] | Area %  |
|--------|---------------|------|-------------|--------------|--------------|---------|
| 1      | 23.376        | BB   | 0.6754      | 1274.11572   | 28.95158     | 77.2414 |
| 2      | 25.848        | BB   | 0.6960      | 375.40952    | 7.82153      | 22.7586 |

Totals : 1649.52524 36.77311

### Ethyl (1-([1,1'-biphenyl]-4-yl)vinyl)(phenyl)phosphinate (4)

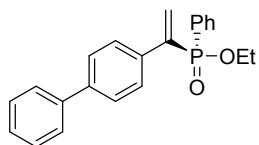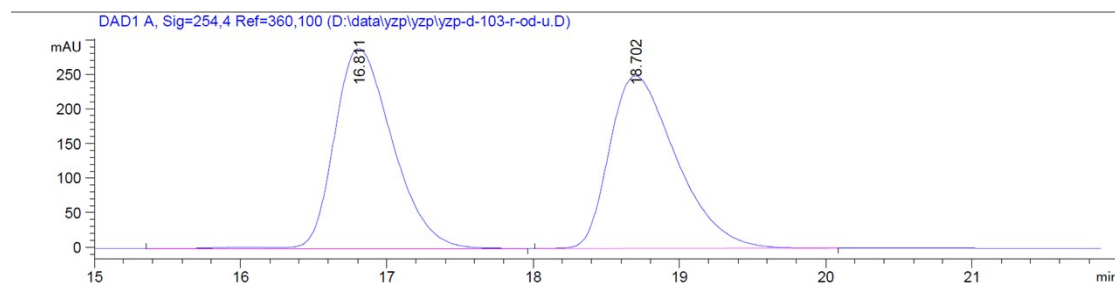

Signal 1: DAD1 A, Sig=254,4 Ref=360,100

| Peak # | RetTime [min] | Type | Width [min] | Area [mAU*s] | Height [mAU] | Area %  |
|--------|---------------|------|-------------|--------------|--------------|---------|
| 1      | 16.811        | BB   | 0.4277      | 7969.07227   | 289.00461    | 50.2286 |
| 2      | 18.702        | BB   | 0.4877      | 7896.53174   | 249.20995    | 49.7714 |

Totals : 1.58656e4 538.21455

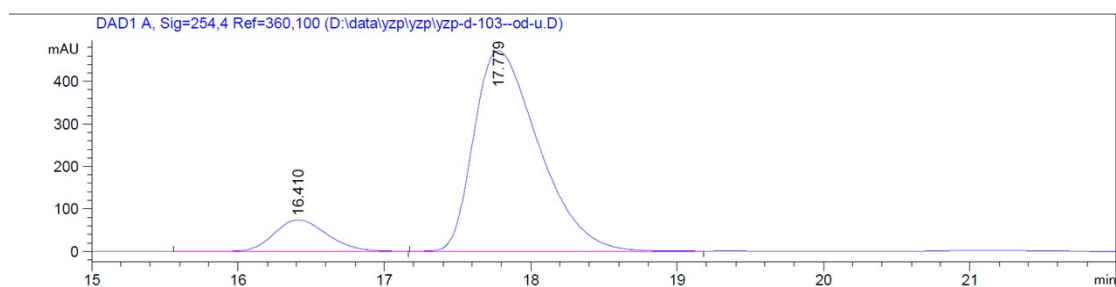

Signal 1: DAD1 A, Sig=254,4 Ref=360,100

| Peak # | RetTime [min] | Type | Width [min] | Area [mAU*s] | Height [mAU] | Area %  |
|--------|---------------|------|-------------|--------------|--------------|---------|
| 1      | 16.410        | BB   | 0.3914      | 1863.21716   | 74.09490     | 11.3717 |
| 2      | 17.779        | BB   | 0.4746      | 1.45215e4    | 472.37955    | 88.6283 |

Totals : 1.63847e4 546.47445

### Ethyl (1-(4-(benzo[d][1,3]dioxol-5-yl)phenyl)vinyl)(phenyl)phosphinate (5)

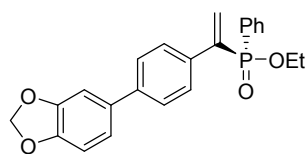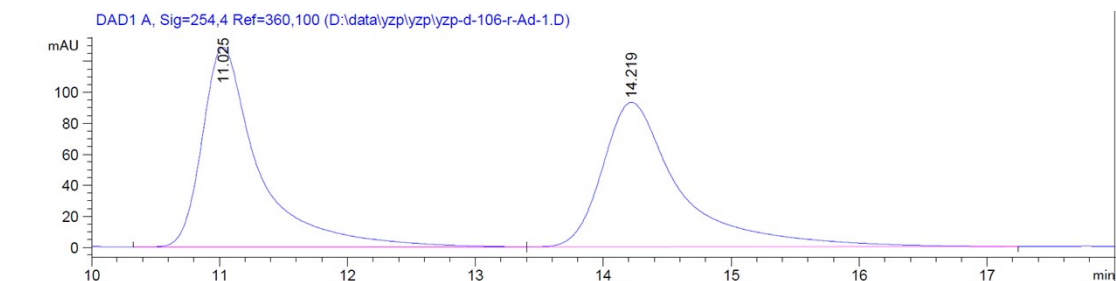

Signal 1: DAD1 A, Sig=254,4 Ref=360,100

| Peak # | RetTime [min] | Type | Width [min] | Area [mAU*s] | Height [mAU] | Area %  |
|--------|---------------|------|-------------|--------------|--------------|---------|
| 1      | 11.025        | BB   | 0.4453      | 3969.77563   | 128.89926    | 50.1733 |
| 2      | 14.219        | BB   | 0.6134      | 3942.35986   | 93.22731     | 49.8267 |

Totals : 7912.13550 222.12657

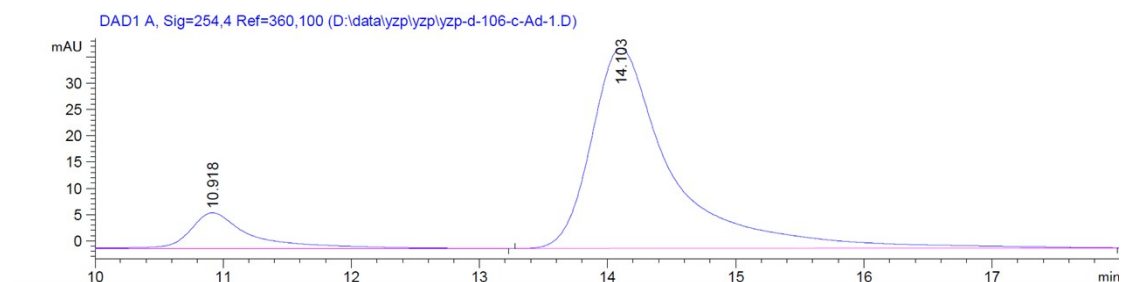

Signal 1: DAD1 A, Sig=254,4 Ref=360,100

| Peak # | RetTime [min] | Type | Width [min] | Area [mAU*s] | Height [mAU] | Area %  |
|--------|---------------|------|-------------|--------------|--------------|---------|
| 1      | 10.918        | BB   | 0.4691      | 223.26852    | 6.76452      | 11.8293 |
| 2      | 14.103        | BB   | 0.6301      | 1664.15625   | 38.06036     | 88.1707 |

Totals : 1887.42477 44.82488

### Ethyl (Z)-(1,2-diphenylvinyl)(phenyl)phosphinate (3qa)

Synthesized by Heck Reaction from **3aa**

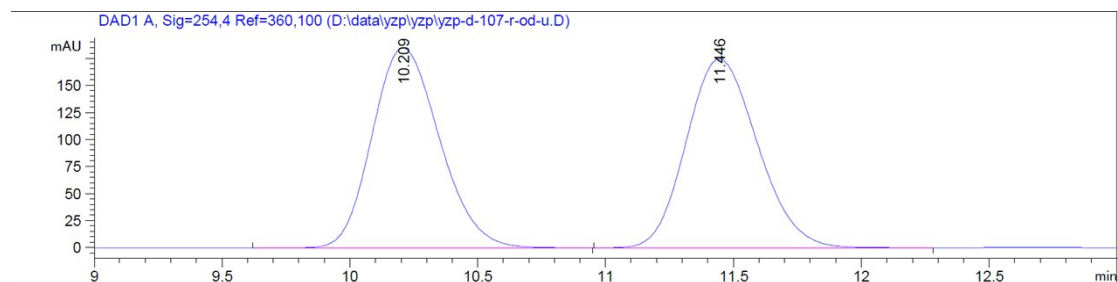



Signal 1: DAD1 A, Sig=254,4 Ref=360,100

| Peak # | RetTime [min] | Type | Width [min] | Area [mAU*s] | Height [mAU] | Area %  |
|--------|---------------|------|-------------|--------------|--------------|---------|
| 1      | 10.209        | BB   | 0.2879      | 3391.75781   | 185.00055    | 50.0071 |
| 2      | 11.446        | BB   | 0.3043      | 3390.79492   | 174.78204    | 49.9929 |

Totals : 6782.55273 359.78259

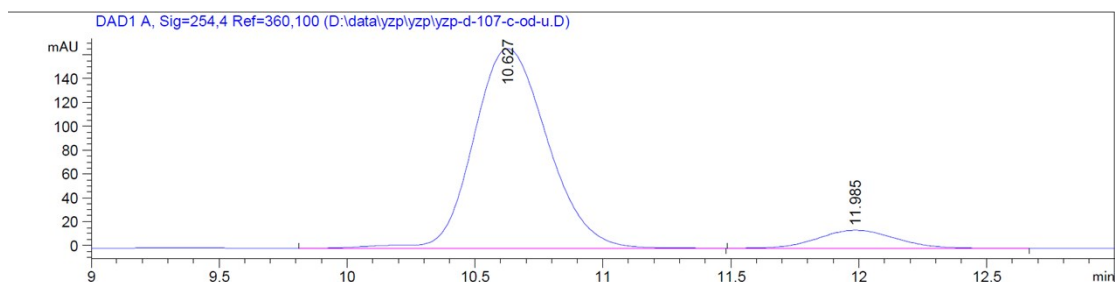

Signal 1: DAD1 A, Sig=254,4 Ref=360,100

| Peak # | RetTime [min] | Type | Width [min] | Area [mAU*s] | Height [mAU] | Area %  |
|--------|---------------|------|-------------|--------------|--------------|---------|
| 1      | 10.627        | BB   | 0.3133      | 3352.64258   | 167.64192    | 91.3298 |
| 2      | 11.985        | BB   | 0.3279      | 318.27710    | 15.10228     | 8.6702  |

Totals : 3670.91968 182.74420

### Ethyl (2-(diphenylphosphaneyl)-1-phenylethyl)(phenyl)phosphinate (6)

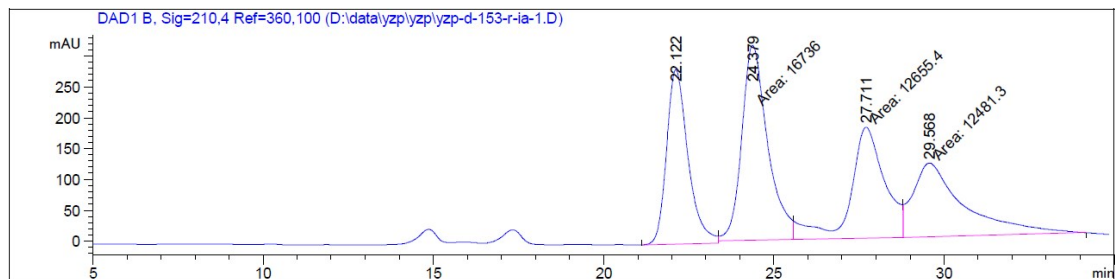

Signal 2: DAD1 B, Sig=210,4 Ref=360,100

| Peak # | RetTime [min] | Type | Width [min] | Area [mAU*s] | Height [mAU] | Area %  |
|--------|---------------|------|-------------|--------------|--------------|---------|
| 1      | 22.122        | BV   | 0.6636      | 1.24106e4    | 283.02176    | 22.8626 |
| 2      | 24.379        | MF   | 0.8836      | 1.67360e4    | 315.67279    | 30.8309 |
| 3      | 27.711        | FM   | 1.1735      | 1.26554e4    | 179.73544    | 23.3137 |
| 4      | 29.568        | MM   | 1.7431      | 1.24813e4    | 119.34130    | 22.9928 |

Totals : 5.42833e4 897.77129

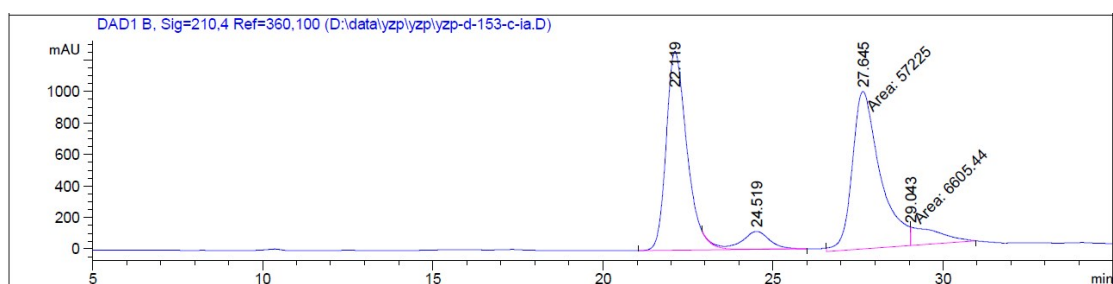

Signal 2: DAD1 B, Sig=210,4 Ref=360,100

| Peak # | RetTime [min] | Type | Width [min] | Area [mAU*s] | Height [mAU] | Area %  |
|--------|---------------|------|-------------|--------------|--------------|---------|
| 1      | 22.119        | BV R | 0.6486      | 5.40321e4    | 1264.40503   | 43.4386 |
| 2      | 24.519        | VB E | 0.8350      | 6524.84131   | 114.46527    | 5.2456  |
| 3      | 27.645        | MF   | 0.9533      | 5.72250e4    | 1000.44855   | 46.0054 |
| 4      | 29.043        | FM   | 0.9372      | 6605.43604   | 117.47057    | 5.3104  |

Totals : 1.24387e5 2496.78942

## 9. X-ray crystal structure of 4

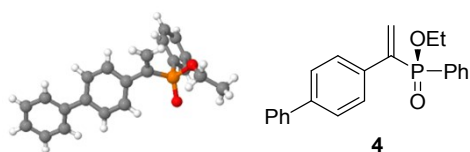

**Table S3**

|                     |                                                  |
|---------------------|--------------------------------------------------|
| Identification code | cxy1119_0m                                       |
| Empirical formula   | C <sub>22</sub> H <sub>21</sub> O <sub>2</sub> P |
| Formula weight      | 348.36                                           |
| Temperature/K       | 100                                              |
| Crystal system      | monoclinic                                       |



|                       |                 |
|-----------------------|-----------------|
| Space group           | P2 <sub>1</sub> |
| a/Å                   | 6.0977(4)       |
| b/Å                   | 8.3134(6)       |
| c/Å                   | 18.1062(12)     |
| $\alpha$ /°           | 90              |
| $\beta$ /°            | 97.792(2)       |
| $\gamma$ /°           | 90              |
| Volume/Å <sup>3</sup> | 909.38(11)      |

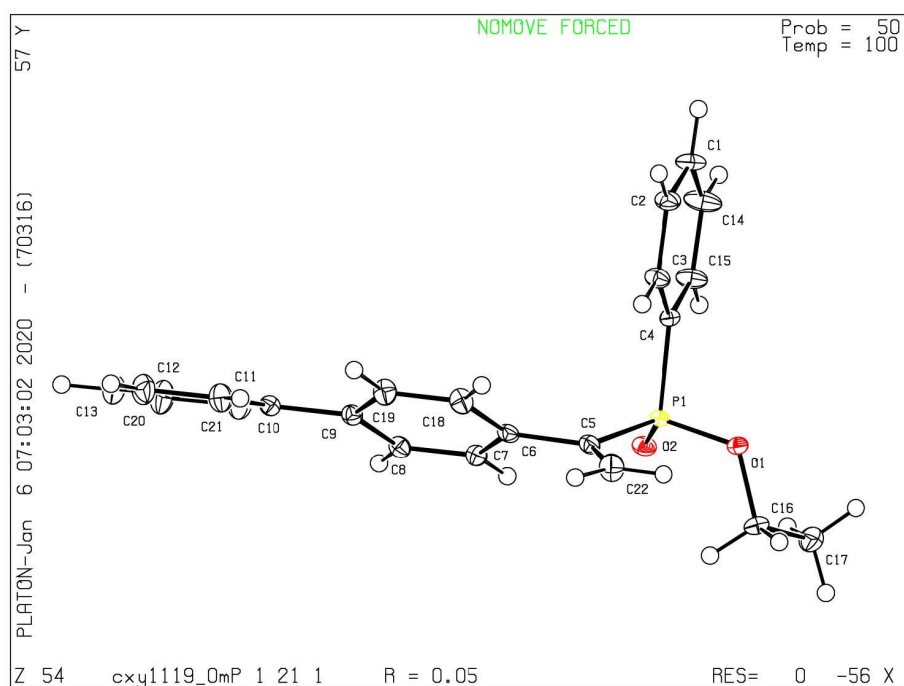

Supplement: d0sc01049a1.pdf [file d0sc01049a1.pdf]
